# Supplementary material for: Heritable components of the human fecal microbiome are associated with visceral fat
Source: Genome Biol. 2016 Sep 26;17:189. doi: 10.1186/s13059-016-1052-7 (PMC5036307; doi:10.1186/s13059-016-1052-7)
Supplement: Additional file 1: — Supplementary Tables. Table S1. OTUs showing at least moderate (A >0.2) heritability in the extended TwinsUK 16S dataset. Each variance component, additive genetics (A, or heritability), shared environment (C) and unique environment (E) shown along with upper and lower 95 % confidence intervals. Average relative abundance of the OTUs in the overall dataset is also shown. Table S2. 149 Bonferroni-significant OTU-adiposity associations. OTU-adiposity results are obtained from linear mixed effects regression models and include the original results (OTU-Adiposity) and results after adjustment for BMI (OTU-Adiposity BMI-adjusted). We also provide the OTU heritability and average OTU abundance in the cohort. The last two columns show the OTU results from the within MZ twin-pair difference analyses (MZ Diff Beta), and whether the MZ results were concordant with the linear mixed effects results. Reported phenotypes are visceral fat (VFM), subcutaneous fat (SFM), android/gynoid ratio (AGR), BMI, waist/hip ratio (WHR) and % trunk fat (pTF). Table S3. Genus-level associations with adiposity, where the collapsed taxonomy OTU genus was significantly associated with adiposity. Reported phenotypes are visceral fat (VFM), subcutaneous fat (SFM), android/gynoid ratio (AGR) and BMI. Table S4. Replication of TwinsUK (TUK-D) results in three independent cohorts, the American Gut (AG), the Flemish Gut Flora Project (FGFP) and the expanded TwinsUK dataset (TUK-R). The table lists the 97 OTUs forming 149 significant adiposity associations in TwinsUK and their association with BMI in both the replication and discovery samples. In addition, the table outlines the results of two meta-analyses that were performed across the studies, the first of just the independent cohorts, and the second including the discovery cohort. Finally, the last section of the table shows which OTUs were replicated in at least one of the replication cohorts. Table S5. Human genomic analyses at adiposity-related cand [file 13059_2016_1052_MOESM1_ESM.xlsx]

## Sheet: Supplementary Table 1
Supplementary Table 1. OTUs showing at least moderate (A >0.2) heritability in the extended TwinsUK 16S dataset. Each variance component, additive genetics (A, or heritability), shared environment (C) and unique environment (E) are shown along with with upper and lower 95% confidence intervals. Average relative abundance of the OTUs in the overall dataset is also shown.
OTU	Taxonomy	A	A-CI-Upper	A-CI-Lower	C	C-CI-Upper	C-CI-Lower	E	E-CI-Upper	E-CI-Lower	Prevalence (% Subjects OTU present in)	Average Relative Abundance
290241	k__Bacteria; p__Firmicutes; c__Clostridia; o__Clostridiales; f__Clostridiaceae; g__Clostridium; s__perfringens	0.427315	0.494125	0.322441	5.32e-14	0.0766648	NA	0.572685	0.645033	0.505875	28.7992	6.38e-05
352014	k__Bacteria; p__Firmicutes; c__Clostridia; o__Clostridiales; f__Ruminococcaceae; g__Oscillospira; s__	0.3643	0.434673	0.239911	2.53e-11	0.0961741	NA	0.6357	0.673434	0.565327	25.7974	5.17e-05
4434334	k__Bacteria; p__Firmicutes; c__Clostridia; o__Clostridiales; f__Clostridiaceae; g__; s__	0.361994	0.43241	0.231721	1.1e-11	0.0994709	NA	0.638006	0.713195	0.56759	95.4034	0.00461364
215468	k__Bacteria; p__Firmicutes; c__Clostridia; o__Clostridiales; f__Ruminococcaceae; g__; s__	0.354753	0.426187	0.199604	1.96e-15	0.120364	NA	0.645247	0.721529	0.573813	34.7092	3.01e-05
4468466	k__Bacteria; p__Firmicutes; c__Clostridia; o__Clostridiales; f__Ruminococcaceae; g__; s__	0.33919	0.410612	0.14866	1.35e-12	0.15222	NA	0.66081	0.736814	0.589388	88.5553	0.00203009
368490	k__Bacteria; p__Firmicutes; c__Bacilli; o__Turicibacterales; f__Turicibacteraceae; g__Turicibacter; s__	0.33879	0.411878	0.260969	1.27e-18	0.102593	NA	0.66121	0.739031	0.588122	75.0469	0.0007671
147100	k__Bacteria; p__Firmicutes; c__Clostridia; o__Clostridiales; f__Ruminococcaceae; g__; s__	0.336149	0.409079	0.226844	2.68e-12	0.0774874	NA	0.663851	0.741295	0.590921	49.7186	7.64e-05
836693	k__Bacteria; p__Firmicutes; c__Clostridia; o__SHA-98; f__; g__; s__	0.332094	0.402706	0.111503	4.41e-10	0.180525	NA	0.667906	0.742874	0.597294	51.8762	9.57e-05
304779	k__Bacteria; p__Firmicutes; c__Clostridia; o__Clostridiales; f__Clostridiaceae; g__Clostridium; s__perfringens	0.323777	0.396054	0.14995	2.13e-11	0.137547	NA	0.676223	0.752868	0.603946	53.3771	6.33e-05
540055	k__Bacteria; p__Firmicutes; c__Clostridia; o__Clostridiales; f__Ruminococcaceae; g__; s__	0.31562	0.3869	0.136475	3.37e-13	0.144977	NA	0.68438	0.759737	0.6131	67.7298	0.000626777
4336939	k__Bacteria; p__Firmicutes; c__Clostridia; o__Clostridiales; f__Ruminococcaceae; g__; s__	0.314365	0.388338	0.115704	1.8e-14	0.155823	NA	0.685635	0.764077	0.611662	50.0938	0.000527935
189820	k__Bacteria; p__Firmicutes; c__Clostridia; o__Clostridiales; f__Ruminococcaceae; g__Ruminococcus; s__	0.313508	0.388204	0.154911	1.62e-11	0.120635	NA	0.686492	0.765657	0.611796	36.1163	2.05e-05
176318	k__Bacteria; p__Firmicutes; c__Clostridia; o__Clostridiales; f__Christensenellaceae; g__; s__	0.313437	0.386537	0.124835	2.52e-13	0.149389	NA	0.686563	0.763969	0.613463	75.8912	0.00246375
New.0.CleanUp.ReferenceOTU37625	k__Bacteria; p__Firmicutes; c__Clostridia; o__Clostridiales; f__Ruminococcaceae; g__Ruminococcus; s__	0.309184	0.382209	0.157736	2.17e-14	0.117751	NA	0.690816	0.767973	0.617791	63.227	4.93e-05
306704	k__Bacteria; p__Firmicutes; c__Clostridia; o__Clostridiales; f__Clostridiaceae; g__; s__	0.304438	0.422494	0.0684813	0.0427404	0.231959	7.27e-43	0.652821	0.736055	0.577507	37.9925	0.000172226
313524	k__Bacteria; p__Firmicutes; c__Clostridia; o__Clostridiales; f__Ruminococcaceae; g__; s__	0.30237	0.375052	0.160074	1.7e-12	0.110636	NA	0.69763	0.774246	0.624948	54.5028	5.12e-05
584107	k__Bacteria; p__Firmicutes; c__Clostridia; o__Clostridiales; f__; g__; s__	0.301852	0.375625	0.223944	3.66e-15	0.13306	NA	0.698148	0.776053	0.624375	34.4278	0.000118188
4383953	k__Bacteria; p__Firmicutes; c__Clostridia; o__Clostridiales; f__Clostridiaceae; g__; s__	0.297992	0.415995	0.187558	0.0448396	0.241052	3.92e-43	0.657168	0.737093	0.584005	89.9625	0.00210984
362955	k__Bacteria; p__Firmicutes; c__Clostridia; o__Clostridiales; f__; g__; s__	0.29139	0.368694	0.210027	1.08e-14	0.0641897	NA	0.70861	0.789972	0.631306	31.6135	8.64e-05
4372528	k__Bacteria; p__Firmicutes; c__Clostridia; o__Clostridiales; f__; g__; s__	0.290702	0.362598	0.108133	6.66e-11	0.148806	NA	0.709298	0.784901	0.637402	75.6098	0.0010206
4324985	k__Bacteria; p__Firmicutes; c__Clostridia; o__Clostridiales; f__Ruminococcaceae; g__; s__	0.282926	0.360693	0.104781	9.61e-14	0.133274	NA	0.717074	0.799134	0.639307	29.0807	3.57e-05
345301	k__Bacteria; p__Firmicutes; c__Clostridia; o__Clostridiales; f__; g__; s__	0.281218	0.380154	0.0473444	7.11e-12	0.173957	NA	0.718782	0.824454	0.619846	25.7974	2.85e-05
819353	k__Bacteria; p__Firmicutes; c__Clostridia; o__Clostridiales; f__Ruminococcaceae; g__; s__	0.275747	0.348632	0.0732816	5.26e-15	0.165224	NA	0.724253	0.800728	0.651368	87.7111	0.00206996
4347159	k__Bacteria; p__Actinobacteria; c__Actinobacteria; o__Bifidobacteriales; f__Bifidobacteriaceae; g__Bifidobacterium; s__adolescentis	0.272608	0.346105	0.0770367	2.32e-13	0.158151	NA	0.727392	0.804483	0.653895	90.8068	0.00708552
190226	k__Bacteria; p__Firmicutes; c__Clostridia; o__Clostridiales; f__Lachnospiraceae; g__; s__	0.271004	0.349197	0.18901	2.2e-15	0.0710401	NA	0.728996	0.81099	0.650803	27.4859	5.27e-05
New.0.CleanUp.ReferenceOTU698	k__Bacteria; p__Firmicutes; c__Clostridia; o__Clostridiales; f__Ruminococcaceae; g__; s__	0.270788	0.346922	0.184297	1.87e-12	0.0684296	NA	0.729212	0.80906	0.653078	29.4559	1.22e-05
535955	k__Bacteria; p__Firmicutes; c__Clostridia; o__Clostridiales; f__Clostridiaceae; g__SMB53; s__	0.266332	0.399558	0.0262915	0.0586596	0.256193	4.39e-43	0.675008	0.75577	0.600438	70.4503	0.000162711
4478840	k__Bacteria; p__Firmicutes; c__Clostridia; o__Clostridiales; f__Clostridiaceae; g__; s__	0.265935	0.343755	0.0773413	7.36e-12	0.143366	NA	0.734065	0.81586	0.656245	35.272	0.000110821
New.0.ReferenceOTU307	k__Archaea; p__Euryarchaeota; c__Methanobacteria; o__Methanobacteriales; f__Methanobacteriaceae; g__Methanobrevibacter; s__	0.264166	0.379469	0.0208178	0.0358523	0.227036	NA	0.699982	0.788273	0.620533	31.8949	7.47e-05
182797	k__Bacteria; p__Firmicutes; c__Clostridia; o__Clostridiales; f__Ruminococcaceae; g__; s__	0.263744	0.339305	0.184683	3.98e-15	0.0942103	NA	0.736256	0.815317	0.660695	36.8668	0.000136446
760544	k__Bacteria; p__Firmicutes; c__Clostridia; o__Clostridiales; f__Ruminococcaceae; g__; s__	0.262386	0.337097	0.0693144	2.14e-12	0.154149	NA	0.737614	0.815873	0.662903	33.9587	5.71e-05
537219	k__Bacteria; p__Firmicutes; c__Clostridia; o__Clostridiales; f__; g__; s__	0.262063	0.339097	0.0856749	5.88e-14	0.135197	NA	0.737937	0.818748	0.660903	51.4071	6.04e-05
4398588	k__Bacteria; p__Firmicutes; c__Clostridia; o__Clostridiales; f__Ruminococcaceae; g__; s__	0.26085	0.336221	0.0930231	3.18e-13	0.123579	NA	0.73915	0.818066	0.663779	51.2195	0.000115165
178845	k__Bacteria; p__Firmicutes; c__Clostridia; o__Clostridiales; f__Ruminococcaceae; g__; s__	0.257978	0.422684	0.0241842	0.0897724	0.277632	1.19e-43	0.652249	0.734806	0.576754	60.6942	0.000832783
4330852	k__Bacteria; p__Firmicutes; c__Clostridia; o__Clostridiales; f__Ruminococcaceae; g__Oscillospira; s__	0.257511	0.335264	0.0095008	0.00158242	0.200577	NA	0.740906	0.82895	0.664735	32.5516	8.07e-05
332027	k__Bacteria; p__Firmicutes; c__Clostridia; o__Clostridiales; f__Christensenellaceae; g__; s__	0.257285	0.338242	0.172345	2.35e-15	0.0941059	NA	0.742715	0.827655	0.661758	26.9231	1.18e-05
4349261	k__Bacteria; p__Firmicutes; c__Clostridia; o__Clostridiales; f__Lachnospiraceae; g__; s__	0.255591	0.350017	0.0089211	0.0191905	0.223413	NA	0.725218	0.808447	0.649983	57.5985	0.000282833
180585	k__Bacteria; p__Firmicutes; c__Clostridia; o__Clostridiales; f__; g__; s__	0.255396	0.331849	0.121026	4.75e-14	0.0999867	NA	0.744604	0.824522	0.668151	36.3977	4.97e-05
4408801	k__Bacteria; p__Firmicutes; c__Clostridia; o__Clostridiales; f__Ruminococcaceae; g__Oscillospira; s__	0.255125	0.357735	0.0202641	0.0268979	0.229559	NA	0.717977	0.801117	0.642267	64.8218	0.00011947
4367187	k__Bacteria; p__Firmicutes; c__Clostridia; o__Clostridiales; f__Peptostreptococcaceae; g__; s__	0.254782	0.331133	0.120823	3.05e-14	0.0782472	NA	0.745218	0.825012	0.668867	42.7767	9.03e-05
3576174	k__Bacteria; p__Firmicutes; c__Clostridia; o__Clostridiales; f__Clostridiaceae; g__; s__	0.254021	0.359481	0.00745704	4.57e-13	0.174722	NA	0.745979	0.85823	0.640519	24.9531	6.43e-05
3805518	k__Bacteria; p__Firmicutes; c__Clostridia; o__Clostridiales; f__Clostridiaceae; g__SMB53; s__	0.254001	0.329925	0.115777	1.79e-15	0.1044	NA	0.745999	0.825319	0.670075	41.7448	4.78e-05
184534	k__Bacteria; p__Firmicutes; c__Clostridia; o__Clostridiales; f__Christensenellaceae; g__; s__	0.252735	0.328626	0.109257	2.45e-14	0.109195	NA	0.747265	0.826549	0.671374	41.2758	0.000597801
4410097	k__Bacteria; p__Firmicutes; c__Clostridia; o__Clostridiales; f__Christensenellaceae; g__; s__	0.251576	0.328723	0.0766831	1.81e-15	0.134486	NA	0.748424	0.829151	0.671277	28.0488	0.000198288
177134	k__Bacteria; p__Firmicutes; c__Clostridia; o__Clostridiales; f__Ruminococcaceae; g__; s__	0.251338	0.330989	0.000369936	0.00433166	0.207954	NA	0.744331	0.829866	0.669011	57.3171	6.2e-05
571642	k__Bacteria; p__Firmicutes; c__Clostridia; o__Clostridiales; f__Ruminococcaceae; g__; s__	0.25112	0.326494	0.0488071	1.51e-12	0.16147	NA	0.74888	0.827692	0.673506	61.7261	7.98e-05
3903651	k__Bacteria; p__Firmicutes; c__Clostridia; o__Clostridiales; f__Ruminococcaceae; g__Oscillospira; s__	0.250048	0.324779	0.0479188	8.18e-13	0.162904	NA	0.749952	0.828025	0.675221	88.743	0.000454677
180136	k__Bacteria; p__Firmicutes; c__Clostridia; o__Clostridiales; f__Ruminococcaceae; g__Oscillospira; s__	0.249889	0.325653	0.0329233	1.84e-13	0.173091	NA	0.750111	0.829354	0.674347	53.3771	6.66e-05
174960	k__Bacteria; p__Firmicutes; c__Clostridia; o__Clostridiales; f__Clostridiaceae; g__; s__	0.249791	0.32851	0.0725546	1.59e-12	0.133598	NA	0.750209	0.832654	0.67149	31.0507	8.64e-06
1504042	k__Bacteria; p__Firmicutes; c__Clostridia; o__Clostridiales; f__Ruminococcaceae; g__Oscillospira; s__	0.249461	0.323614	0.0227825	9.51e-11	0.185331	NA	0.750539	0.828007	0.676386	94.7467	0.000672967
538322	k__Bacteria; p__Firmicutes; c__Clostridia; o__Clostridiales; f__Ruminococcaceae; g__Oscillospira; s__	0.247951	0.323804	0.019481	3.51e-11	0.182673	NA	0.752049	0.831374	0.676196	68.4803	8.83e-05
4453501	k__Bacteria; p__Firmicutes; c__Clostridia; o__Clostridiales; f__Veillonellaceae; g__Veillonella; s__dispar	0.247783	0.32368	0.0788957	4.13e-12	0.131945	NA	0.752217	0.831485	0.67632	71.0131	0.000398796
182044	k__Bacteria; p__Firmicutes; c__Clostridia; o__Clostridiales; f__Ruminococcaceae; g__; s__	0.246514	0.322823	0.0524565	1.45e-12	0.152803	NA	0.753486	0.833235	0.677177	50.9381	0.000339875
337285	k__Bacteria; p__Firmicutes; c__Clostridia; o__Clostridiales; f__; g__; s__	0.246341	0.326204	0.0661431	2.34e-14	0.134062	NA	0.753659	0.83731	0.673796	31.2383	2.77e-05
3195723	k__Bacteria; p__Firmicutes; c__Clostridia; o__Clostridiales; f__Ruminococcaceae; g__Oscillospira; s__	0.246004	0.32086	0.0659586	5.62e-15	0.143838	NA	0.753996	0.832104	0.67914	67.7298	0.000144442
4370941	k__Bacteria; p__Firmicutes; c__Clostridia; o__Clostridiales; f__Ruminococcaceae; g__; s__	0.245757	0.321811	0.0142264	5.51e-12	0.188959	NA	0.754243	0.833765	0.678189	59.9437	6.42e-05
4350477	k__Bacteria; p__Firmicutes; c__Clostridia; o__Clostridiales; f__; g__; s__	0.245474	0.326735	0.160597	1.8e-14	0.0722318	NA	0.754526	0.839396	0.673265	48.9681	0.000103066
4477696	k__Bacteria; p__Proteobacteria; c__Gammaproteobacteria; o__Pasteurellales; f__Pasteurellaceae; g__Haemophilus; s__parainfluenzae	0.244931	0.357446	4.19e-43	0.0348738	0.234046	NA	0.720195	0.805164	0.642552	86.2101	0.00280651
184940	k__Bacteria; p__Firmicutes; c__Clostridia; o__Clostridiales; f__Christensenellaceae; g__; s__	0.244828	0.323374	0.0569338	9.4e-12	0.143122	NA	0.755172	0.837351	0.676626	42.1201	5.29e-05
New.0.CleanUp.ReferenceOTU14950	k__Bacteria; p__Firmicutes; c__Clostridia; o__Clostridiales; f__Christensenellaceae; g__; s__	0.244202	0.32269	0.0705625	2.02e-13	0.131364	NA	0.755798	0.837868	0.67731	34.6154	2.9e-05
177047	k__Bacteria; p__Firmicutes; c__Clostridia; o__Clostridiales; f__Lachnospiraceae	0.240815	0.343265	2.97e-43	0.0254821	0.227756	NA	0.733703	0.818413	0.656734	66.9794	0.000109827
185558	k__Bacteria; p__Firmicutes; c__Clostridia; o__Clostridiales; f__; g__; s__	0.238652	0.31668	0.157371	9.89e-15	0.0867336	NA	0.761348	0.842629	0.68332	47.1857	5.71e-05
4465124	k__Bacteria; p__Firmicutes; c__Clostridia; o__Clostridiales; f__Clostridiaceae; g__Clostridium; s__	0.238587	0.314776	0.0336711	1.01e-11	0.162877	NA	0.761413	0.840912	0.685221	85.272	0.00231379
1945397	k__Bacteria; p__Firmicutes; c__Clostridia; o__Clostridiales; f__; g__; s__	0.236979	0.315875	0.154821	2.28e-19	0.0794888	NA	0.763021	0.845179	0.684125	31.7073	0.000135514
192385	k__Bacteria; p__Firmicutes; c__Clostridia; o__Clostridiales; f__Christensenellaceae; g__; s__	0.235773	0.312837	0.0886547	6.98e-13	0.125678	NA	0.764227	0.844549	0.687163	33.5835	2.39e-05
2724175	k__Bacteria; p__Firmicutes; c__Clostridia; o__Clostridiales; f__Lachnospiraceae	0.235604	0.311285	0.156746	3.37e-16	0.152428	NA	0.764396	0.843254	0.688715	70.7317	0.00186602
4437359	k__Bacteria; p__Firmicutes; c__Clostridia; o__Clostridiales; f__Ruminococcaceae; g__Oscillospira; s__	0.233465	0.309557	0.0155349	5.32e-11	0.174531	NA	0.766535	0.845853	0.690443	82.0826	0.000752968
4402903	k__Bacteria; p__Firmicutes; c__Clostridia; o__Clostridiales; f__Christensenellaceae; g__; s__	0.232966	0.309113	0.0658481	5.27e-12	0.130892	NA	0.767034	0.846312	0.690887	73.0769	0.00192432
4300690	k__Bacteria; p__Firmicutes; c__Clostridia; o__Clostridiales; f__Ruminococcaceae; g__; s__	0.232171	0.381587	1.12e-43	0.07343	0.271654	3.82e-43	0.694399	0.776235	0.618402	71.9512	0.00243993
3973322	k__Bacteria; p__Firmicutes; c__Clostridia; o__Clostridiales; f__; g__; s__	0.231112	0.32212	9.94e-44	0.0118576	0.209608	NA	0.757031	0.847098	0.677883	64.4465	0.000186026
232030	k__Bacteria; p__Firmicutes; c__Clostridia; o__Clostridiales; f__Lachnospiraceae; g__Coprococcus; s__	0.230808	0.308454	0.102308	2.27e-15	0.093965	NA	0.769192	0.84995	0.691546	26.5478	5.48e-05
New.0.CleanUp.ReferenceOTU34809	k__Bacteria; p__Firmicutes; c__Clostridia; o__Clostridiales; f__Ruminococcaceae; g__; s__	0.22806	0.303183	0.00833855	3.26e-14	0.178862	NA	0.77194	0.850101	0.696817	25.0469	1.46e-05
198248	k__Bacteria; p__Firmicutes; c__Clostridia; o__Clostridiales; f__Ruminococcaceae; g__; s__	0.227782	0.307067	0.145342	3.98e-17	0.0839586	NA	0.772218	0.854658	0.692933	38.5553	0.000165352
308544	k__Bacteria; p__Firmicutes; c__Clostridia; o__Clostridiales; f__Lachnospiraceae; g__Blautia; s__	0.2267	0.301614	5.13e-44	2.74e-11	0.198288	NA	0.7733	0.851243	0.698386	93.7148	0.000203145
72820	k__Bacteria; p__Actinobacteria; c__Actinobacteria; o__Bifidobacteriales; f__Bifidobacteriaceae; g__Bifidobacterium; s__longum	0.225931	0.302988	0.016686	1.34e-12	0.165643	NA	0.774069	0.854298	0.697012	90.8068	0.00255192
4466707	k__Bacteria; p__Firmicutes; c__Clostridia; o__Clostridiales; f__Lachnospiraceae; g__Coprococcus; s__	0.224145	0.302683	0.102882	3.75e-12	0.0861135	NA	0.775855	0.857424	0.697317	30.6754	0.000158254
350503	k__Bacteria; p__Firmicutes; c__Clostridia; o__Clostridiales; f__Ruminococcaceae; g__; s__	0.223637	0.304379	1.65e-43	0.00223018	0.199219	NA	0.774133	0.865038	0.695619	62.2889	0.00115262
177515	k__Bacteria; p__Firmicutes; c__Clostridia; o__Clostridiales; f__Lachnospiraceae; g__Roseburia; s__	0.222343	0.299452	0.0393432	8.79e-13	0.164622	NA	0.777657	0.857879	0.700548	95.4034	0.00314337
218710	k__Bacteria; p__Firmicutes; c__Clostridia; o__Clostridiales; f__; g__; s__	0.222279	0.301399	0.06174	1.97e-14	0.120431	NA	0.777721	0.860043	0.698601	43.9024	3.32e-05
178183	k__Bacteria; p__Firmicutes; c__Clostridia; o__Clostridiales	0.221175	0.298782	8.77e-44	2.07e-12	0.17976	NA	0.778825	0.859603	0.701218	48.6867	5.94e-05
174611	k__Bacteria; p__Firmicutes; c__Clostridia; o__Clostridiales; f__Ruminococcaceae; g__Faecalibacterium; s__prausnitzii	0.220665	0.297377	1.75e-43	2.55e-13	0.181129	NA	0.779335	0.859125	0.702623	80.9568	0.00153352
593422	k__Bacteria; p__Firmicutes; c__Clostridia; o__Clostridiales; f__; g__; s__	0.219758	0.298031	0.0680594	7.08e-14	0.114335	NA	0.780242	0.861566	0.701969	32.9268	2.13e-05
561607	k__Bacteria; p__Firmicutes; c__Clostridia; o__Clostridiales; f__Ruminococcaceae; g__; s__	0.219395	0.299706	0.0483383	4.12e-16	0.127405	NA	0.780605	0.864205	0.700294	38.0863	9.95e-05
4443846	k__Bacteria; p__Firmicutes; c__Clostridia; o__Clostridiales; f__Lachnospiraceae; g__[Ruminococcus]	0.219193	0.294944	0.140582	1.09e-14	0.130664	NA	0.780807	0.859417	0.705056	71.0131	0.000129227
4375889	k__Bacteria; p__Firmicutes; c__Clostridia; o__Clostridiales; f__Ruminococcaceae; g__; s__	0.218817	0.295184	4.45e-43	1.94e-12	0.179567	NA	0.781183	0.860556	0.704816	54.878	4.62e-05
360890	k__Bacteria; p__Firmicutes; c__Clostridia; o__Clostridiales; f__; g__; s__	0.218594	0.308452	3.39e-43	0.012533	0.213643	NA	0.768873	0.855134	0.691548	63.9775	0.000335261
338301	k__Bacteria; p__Firmicutes; c__Clostridia; o__Clostridiales; f__; g__; s__	0.218091	0.294541	0.0666001	3.73e-12	0.116519	NA	0.781909	0.861222	0.705459	38.3677	0.000206206
302300	k__Bacteria; p__Firmicutes; c__Clostridia; o__Clostridiales; f__Ruminococcaceae; g__; s__	0.2176	0.33095	1.01e-43	0.032963	0.228261	NA	0.749437	0.837695	0.669047	31.1445	1.43e-05
178478	k__Bacteria; p__Bacteroidetes; c__Bacteroidia; o__Bacteroidales; f__Bacteroidaceae; g__Bacteroides; s__	0.215423	0.292871	0.017668	1.03e-14	0.155782	NA	0.784577	0.865035	0.707129	71.576	0.000301383
296717	k__Bacteria; p__Firmicutes; c__Clostridia; o__Clostridiales; f__; g__; s__	0.215221	0.317768	4.95e-44	5.28e-12	0.213638	NA	0.784779	0.892718	0.682232	25.0469	8.27e-06
182643	k__Bacteria; p__Firmicutes; c__Clostridia; o__Clostridiales; f__Clostridiaceae; g__Clostridium; s__	0.214767	0.292286	0.0668953	2.37e-14	0.112452	NA	0.785233	0.865646	0.707714	67.8236	0.000470588
307113	k__Bacteria; p__Firmicutes; c__Clostridia; o__Clostridiales; f__Lachnospiraceae; g__; s__	0.21351	0.292314	6.58e-43	4.52e-09	0.193567	NA	0.78649	0.868508	0.707686	83.0206	0.000100403
310979	k__Bacteria; p__Firmicutes; c__Clostridia; o__Clostridiales; f__; g__; s__	0.213171	0.290847	0.132277	6.35e-14	0.120056	NA	0.786829	0.867406	0.709153	67.0732	4.16e-05
128297	k__Bacteria; p__Firmicutes; c__Clostridia; o__Clostridiales; f__Ruminococcaceae; g__; s__	0.212984	0.291659	0.117509	5.45e-14	0.114257	NA	0.787016	0.868657	0.708341	38.9306	7.64e-05
4431545	k__Bacteria; p__Firmicutes; c__Clostridia; o__Clostridiales; f__Ruminococcaceae; g__; s__	0.212852	0.289388	0.0169772	6.99e-14	0.156354	NA	0.787148	0.866566	0.710612	61.1632	7.3e-05
292758	k__Bacteria; p__Firmicutes; c__Clostridia; o__Clostridiales; f__; g__; s__	0.212771	0.290859	1.16e-44	2.24e-09	0.194459	NA	0.787229	0.868545	0.709141	56.848	0.000503565
178712	k__Bacteria; p__Firmicutes; c__Clostridia; o__Clostridiales; f__; g__; s__	0.212682	0.302212	3.84e-43	0.0105926	0.206324	NA	0.776725	0.865727	0.697789	40.3377	9.28e-05
New.0.CleanUp.ReferenceOTU15088	k__Bacteria; p__Firmicutes; c__Clostridia; o__Clostridiales; f__Ruminococcaceae; g__; s__	0.21183	0.289398	0.131227	4.96e-16	0.191439	NA	0.78817	0.868773	0.710602	54.9719	0.000176258
194597	k__Bacteria; p__Firmicutes; c__Clostridia; o__Clostridiales; f__; g__; s__	0.211182	0.289823	0.0259752	3.4e-14	0.142995	NA	0.788818	0.870475	0.710177	77.3921	0.00545842
564320	k__Bacteria; p__Firmicutes; c__Clostridia; o__Clostridiales; f__Ruminococcaceae; g__; s__	0.211094	0.291131	0.0821733	3.02e-14	0.0916469	NA	0.788906	0.871905	0.708869	45.2158	7.09e-05
4449427	k__Bacteria; p__Firmicutes; c__Clostridia; o__Clostridiales; f__Lachnospiraceae; g__Dorea; s__	0.210065	0.286493	0.0917723	3.39e-15	0.119883	NA	0.789935	0.869099	0.713507	89.6811	0.00161658
297792	k__Bacteria; p__Firmicutes; c__Clostridia; o__Clostridiales; f__Ruminococcaceae; g__; s__	0.209882	0.388999	5.02e-43	0.0979703	0.281541	2.99e-44	0.692148	0.781498	0.610309	32.2702	2.66e-05
180216	k__Bacteria; p__Firmicutes; c__Clostridia; o__Clostridiales; f__Lachnospiraceae; g__; s__	0.209074	0.408754	5.57e-43	0.133557	0.328324	5.39e-43	0.657369	0.734393	0.586059	25.2345	0.000261478
194297	k__Bacteria; p__Firmicutes; c__Clostridia; o__Clostridiales; f__Ruminococcaceae; g__Ruminococcus; s__	0.20877	0.285503	0.129154	2.79e-13	0.167397	NA	0.79123	0.870819	0.714497	65.3846	0.000936444
197890	k__Bacteria; p__Firmicutes; c__Clostridia; o__Clostridiales; f__Ruminococcaceae; g__Oscillospira; s__	0.207933	0.284935	0.128192	4.7e-15	0.113686	NA	0.792067	0.871808	0.715065	60.6004	6.54e-05
845444	k__Bacteria; p__Firmicutes; c__Clostridia; o__Clostridiales; f__Ruminococcaceae; g__; s__	0.207767	0.286006	0.0200192	2.92e-11	0.146171	NA	0.792233	0.873395	0.713994	35.1782	0.000113563
322505	k__Bacteria; p__Firmicutes; c__Clostridia; o__Clostridiales; f__Lachnospiraceae; g__; s__	0.207493	0.300105	3.08e-46	0.0149389	0.212809	NA	0.777568	0.863563	0.699898	31.7073	0.000117748
292735	k__Bacteria; p__Firmicutes; c__Clostridia; o__Clostridiales; f__Lachnospiraceae; g__Blautia; s__	0.206137	0.333619	6.72e-43	0.0518251	0.254081	2.04e-43	0.742038	0.82252	0.666381	96.8105	0.000362789
290974	k__Bacteria; p__Firmicutes; c__Clostridia; o__Clostridiales; f__Clostridiaceae; g__Clostridium; s__	0.205256	0.283725	1.58e-43	8.5e-13	0.188753	NA	0.794744	0.876215	0.716275	38.8368	1.77e-05
338105	k__Bacteria; p__Firmicutes; c__Clostridia; o__Clostridiales; f__Christensenellaceae; g__; s__	0.205206	0.309904	NA	0.0242429	0.216401	NA	0.770551	0.859472	0.690097	34.8968	2.69e-05
1110312	k__Bacteria; p__Firmicutes; c__Clostridia; o__Clostridiales; f__; g__; s__	0.204822	0.283334	0.123515	1.42e-16	0.109131	NA	0.795178	0.876485	0.716666	33.3021	0.000149232
2714942	k__Bacteria; p__Firmicutes; c__Clostridia; o__Clostridiales; f__Lachnospiraceae; g__[Ruminococcus]; s__gnavus	0.204703	0.281505	0.0125626	2.01e-12	0.153087	NA	0.795297	0.874861	0.718495	32.2702	6.46e-05
9710	k__Bacteria; p__Proteobacteria; c__Gammaproteobacteria; o__Enterobacteriales; f__Enterobacteriaceae	0.203649	0.283403	3.06e-43	3e-12	0.171087	NA	0.796351	0.879154	0.716597	27.2045	1.43e-05
168439	k__Bacteria; p__Firmicutes; c__Clostridia; o__Clostridiales; f__Ruminococcaceae; g__Oscillospira; s__	0.203528	0.338912	1.13e-43	0.0586007	0.256631	3.45e-43	0.737871	0.819637	0.661088	35.8349	0.00019275
New.0.CleanUp.ReferenceOTU6169	k__Bacteria; p__Firmicutes; c__Clostridia; o__Clostridiales; f__Ruminococcaceae; g__Oscillospira; s__	0.2026	0.28334	6.17e-44	7.09e-13	0.183068	NA	0.7974	0.881304	0.71666	26.5478	7.77e-06
216010	k__Bacteria; p__Firmicutes; c__Clostridia; o__Clostridiales; f__[Mogibacteriaceae]; g__; s__	0.202206	0.280081	0.0108141	1.59e-13	0.150479	NA	0.797794	0.87848	0.719919	40.9006	4.48e-05
New.0.ReferenceOTU68	k__Bacteria; p__Proteobacteria; c__Gammaproteobacteria; o__Enterobacteriales; f__Enterobacteriaceae; g__; s__	0.201774	0.281449	4.87e-44	4.96e-10	0.186133	NA	0.798226	0.880954	0.718551	27.3921	2.12e-05
359445	k__Bacteria; p__Firmicutes; c__Clostridia; o__Clostridiales; f__Ruminococcaceae; g__; s__	0.201704	0.282121	0.0512247	1.58e-13	0.110639	NA	0.798296	0.881616	0.717879	30.863	2.02e-05
365385	k__Bacteria; p__Actinobacteria; c__Actinobacteria; o__Bifidobacteriales; f__Bifidobacteriaceae; g__Bifidobacterium	0.200944	0.282385	0.0663096	2.6e-12	0.0951892	NA	0.799056	0.883401	0.717615	30.2064	0.000228838
4424239	k__Bacteria; p__Firmicutes; c__Bacilli; o__Lactobacillales; f__Streptococcaceae; g__Streptococcus; s__	0.200329	0.299023	NA	0.0204709	0.215491	NA	0.779201	0.865098	0.700977	68.5741	0.000169184
553611	k__Bacteria; p__Actinobacteria; c__Actinobacteria; o__Bifidobacteriales; f__Bifidobacteriaceae; g__Bifidobacterium; s__	0.200168	0.292336	NA	0.012773	0.20432	NA	0.787059	0.876097	0.707664	33.9587	0.000102406
191651	k__Bacteria; p__Firmicutes; c__Clostridia; o__Clostridiales; f__Ruminococcaceae; g__; s__	0.200001	0.288244	NA	0.00874037	0.19939	NA	0.791259	0.881244	0.711758	39.3058	1.72e-05

## Sheet: Supplementary Table 2
Supplementary Table 2. 149 Bonferonni-significant OTU-adiposity associations. OTU-adiposity results are obtained from linear mixed effects regression models, and include the original results (OTU-Adiposity) and results after adjustment for BMI (OTU-Adiposity BMI-adjusted). We also provide the OTU heritability and average OTU abundance in the cohort. The last two columns show the OTU results from …
OTU	Taxonomy	Phenotype	OTU-Adiposity				OTU-Adiposity BMI-adjusted			OTU h2	Average Abundance	MZ Diff Beta	Beta Direction Concordant
			P Value	Std Err	Estimate	FDR	P Value	Std Err	Estimate
372146	k__Bacteria; p__Firmicutes; c__Clostridia; o__Clostridiales; f__Ruminococcaceae; g__Oscillospira; s__	VFM	1.93e-12	0.0222061	-0.158055	4.12e-09	9.35e-07	0.0152556	-0.07559	0.161324	1.24e-05	-0.0779125	Yes
352014	k__Bacteria; p__Firmicutes; c__Clostridia; o__Clostridiales; f__Ruminococcaceae; g__Oscillospira; s__	VFM	1.91e-11	0.0233608	-0.158919	2.04e-08	1.84e-06	0.0158368	-0.0760633	0.3643	5.17e-05	-0.11072	Yes
4468466	k__Bacteria; p__Firmicutes; c__Clostridia; o__Clostridiales; f__Ruminococcaceae; g__; s__	VFM	7.26e-11	0.0231959	-0.153124	5.16e-08	8.52e-08	0.015527	-0.0838012	0.33919	0.00203009	-0.039146	Yes
372146	k__Bacteria; p__Firmicutes; c__Clostridia; o__Clostridiales; f__Ruminococcaceae; g__Oscillospira; s__	SFM	1.66e-10	0.0223109	-0.143921	3.53e-07	2.24e-05	0.0128295	-0.0549465	0.161324	1.24e-05	-0.154595	Yes
2835813	k__Bacteria; p__Firmicutes; c__Clostridia; o__Clostridiales; f__Ruminococcaceae; g__; s__	VFM	2.64e-10	0.0224127	-0.142806	1.41e-07	5.39e-05	0.0152244	-0.061708	0.117672	9.65e-05	-0.0805853	Yes
4370941	k__Bacteria; p__Firmicutes; c__Clostridia; o__Clostridiales; f__Ruminococcaceae; g__; s__	VFM	4.09e-10	0.0228465	-0.143953	1.48e-07	2.65e-08	0.0154606	-0.0865786	0.245757	6.42e-05	-0.099989	Yes
147100	k__Bacteria; p__Firmicutes; c__Clostridia; o__Clostridiales; f__Ruminococcaceae; g__; s__	VFM	4.15e-10	0.0232312	-0.146607	1.48e-07	1.61e-05	0.0156688	-0.0679413	0.336149	7.64e-05	0.00626568	No
New.0.CleanUp.ReferenceOTU33470	k__Bacteria; p__Firmicutes; c__Clostridia; o__Clostridiales; f__Ruminococcaceae; g__Ruminococcus; s__	VFM	6.46e-10	0.0222449	-0.138755	1.82e-07	2.14e-06	0.0151911	-0.0723299	0.191503	2.04e-05	-0.0759536	Yes
300870	k__Bacteria; p__Firmicutes; c__Clostridia; o__Clostridiales; f__Ruminococcaceae; g__; s__	VFM	6.82e-10	0.0227673	-0.141552	1.82e-07	6.28e-06	0.0154782	-0.0702947	0.184628	2.67e-05	-0.0756965	Yes
372146	k__Bacteria; p__Firmicutes; c__Clostridia; o__Clostridiales; f__Ruminococcaceae; g__Oscillospira; s__	AGR	7.95e-10	0.0202538	-0.125687	1.7e-06	3.42e-05	0.017798	-0.0743539	0.161324	1.24e-05	-0.182157	Yes
4349261	k__Bacteria; p__Firmicutes; c__Clostridia; o__Clostridiales; f__Lachnospiraceae; g__; s__	VFM	9.18e-10	0.0228679	-0.141306	2.18e-07	0.000159048	0.0155459	-0.0588839	0.255591	0.000282833	-0.087267	Yes
3014082	k__Bacteria; p__Firmicutes; c__Clostridia; o__Clostridiales; f__Lachnospiraceae	VFM	1.26e-09	0.0226819	0.138973	2.69e-07	4.2e-10	0.0152095	0.0958813	0.121673	0.000168165	0.0427596	Yes
3014082	k__Bacteria; p__Firmicutes; c__Clostridia; o__Clostridiales; f__Lachnospiraceae	AGR	2.52e-09	0.0207531	0.124811	2.69e-06	1.85e-08	0.0179189	0.101609	0.121673	0.000168165	0.197122	Yes
4398588	k__Bacteria; p__Firmicutes; c__Clostridia; o__Clostridiales; f__Ruminococcaceae; g__; s__	VFM	3.41e-09	0.0225996	-0.134527	6.62e-07	0.000987369	0.0152989	-0.0505247	0.26085	0.000115165	-0.114758	Yes
310979	k__Bacteria; p__Firmicutes; c__Clostridia; o__Clostridiales; f__; g__; s__	VFM	4.3e-09	0.0225262	-0.133673	7.65e-07	1.01e-05	0.0152336	-0.0678481	0.213171	4.16e-05	-0.165403	Yes
581201	k__Bacteria; p__Firmicutes; c__Clostridia; o__Clostridiales; f__Ruminococcaceae; g__; s__	VFM	4.85e-09	0.0232094	-0.136936	7.97e-07	1.64e-05	0.0156674	-0.067757	0.13114	0.000127378	0.0317793	Yes
352014	k__Bacteria; p__Firmicutes; c__Clostridia; o__Clostridiales; f__Ruminococcaceae; g__Oscillospira; s__	SFM	6.95e-09	0.0234816	-0.137232	7.41e-06	3.41e-05	0.0132315	-0.0550677	0.3643	5.17e-05	-0.103972	Yes
44151	k__Bacteria; p__Firmicutes; c__Clostridia; o__Clostridiales; f__Ruminococcaceae; g__; s__	VFM	1.68e-08	0.0225224	-0.12786	2.57e-06	2.34e-05	0.0153101	-0.0651008	0.130021	3.24e-05	-0.121922	Yes
3195723	k__Bacteria; p__Firmicutes; c__Clostridia; o__Clostridiales; f__Ruminococcaceae; g__Oscillospira; s__	VFM	1.96e-08	0.0226511	-0.128333	2.64e-06	0.0247365	0.0154366	-0.0347363	0.246004	0.000144442	0.0427539	No
4433737	k__Bacteria; p__Firmicutes; c__Clostridia; o__Clostridiales; f__Lachnospiraceae; g__; s__	VFM	2.16e-08	0.0222493	0.125392	2.64e-06	0.00297391	0.0151882	0.0452549	0.115925	9.95e-06	0.0759834	Yes
New.0.CleanUp.ReferenceOTU26796	k__Bacteria; p__Firmicutes; c__Clostridia; o__Clostridiales; f__Lachnospiraceae; g__Lachnospira; s__	VFM	2.33e-08	0.0226541	-0.1274	2.64e-06	8.8e-06	0.0153353	-0.0684718	0.0341262	3.35e-05	-0.0285788	Yes
297792	k__Bacteria; p__Firmicutes; c__Clostridia; o__Clostridiales; f__Ruminococcaceae; g__; s__	VFM	2.39e-08	0.0236075	-0.132883	2.64e-06	4.23e-05	0.0158108	-0.0650458	0.209882	2.66e-05	0.00649802	No
300374	k__Bacteria; p__Firmicutes; c__Clostridia; o__Clostridiales; f__Ruminococcaceae; g__Oscillospira; s__	VFM	2.41e-08	0.0232804	-0.13157	2.64e-06	9.76e-07	0.0155566	-0.0766575	0.184971	4.87e-05	-0.0476374	Yes
189924	k__Bacteria; p__Firmicutes; c__Clostridia; o__Clostridiales; f__Ruminococcaceae; g__; s__	VFM	2.47e-08	0.0224277	-0.126762	2.64e-06	5.69e-05	0.0151828	-0.0615959	0.118994	4.79e-05	-0.0184537	Yes
4153054	k__Bacteria; p__Firmicutes; c__Clostridia; o__Clostridiales; f__Ruminococcaceae; g__; s__	VFM	2.9e-08	0.0226083	-0.126372	2.87e-06	5.53e-05	0.0152369	-0.0617032	0.160684	0.000600406	-0.119806	Yes
180585	k__Bacteria; p__Firmicutes; c__Clostridia; o__Clostridiales; f__; g__; s__	VFM	3.22e-08	0.02315	-0.129214	2.87e-06	6.01e-05	0.0155936	-0.0627974	0.255396	4.97e-05	0.0188828	No
538322	k__Bacteria; p__Firmicutes; c__Clostridia; o__Clostridiales; f__Ruminococcaceae; g__Oscillospira; s__	VFM	3.22e-08	0.0230061	-0.128207	2.87e-06	0.000124705	0.0155297	-0.0598272	0.247951	8.83e-05	-0.0329421	Yes
345301	k__Bacteria; p__Firmicutes; c__Clostridia; o__Clostridiales; f__; g__; s__	VFM	3.23e-08	0.0229768	-0.127886	2.87e-06	9.64e-05	0.0155512	-0.0608477	0.281218	2.85e-05	-0.0304777	Yes
4465124	k__Bacteria; p__Firmicutes; c__Clostridia; o__Clostridiales; f__Clostridiaceae; g__Clostridium; s__	VFM	3.8e-08	0.0227287	-0.126314	3.14e-06	0.00164698	0.0154656	-0.0490559	0.238587	0.00231379	0.00416196	No
4421273	k__Bacteria; p__Firmicutes; c__Clostridia; o__Clostridiales; f__Ruminococcaceae; g__Oscillospira; s__	VFM	3.83e-08	0.0230905	-0.128481	3.14e-06	9.12e-07	0.0155463	-0.0767195	0.044413	5.36e-05	0.00975525	No
313524	k__Bacteria; p__Firmicutes; c__Clostridia; o__Clostridiales; f__Ruminococcaceae; g__; s__	VFM	4.04e-08	0.0231684	-0.128184	3.19e-06	0.00705304	0.0156921	-0.0423818	0.30237	5.12e-05	-0.0439193	Yes
553080	k__Bacteria; p__Firmicutes; c__Clostridia; o__Clostridiales; f__; g__; s__	VFM	4.48e-08	0.0232238	-0.128177	3.35e-06	0.00177172	0.0156885	-0.0491672	0.196068	0.000334622	-0.048174	Yes
289734	k__Bacteria; p__Firmicutes; c__Clostridia; o__Clostridiales; f__Lachnospiraceae; g__; s__	VFM	4.55e-08	0.0228806	0.125854	3.35e-06	1.38e-08	0.0156227	0.089297	0.188009	0.00999317	0.0828987	Yes
4377149	k__Bacteria; p__Firmicutes; c__Clostridia; o__Clostridiales; f__; g__; s__	VFM	4.74e-08	0.0227652	-0.12677	3.38e-06	1.65e-06	0.0153361	-0.0742513	0.0276282	0.000352048	-0.000864386	Yes
180136	k__Bacteria; p__Firmicutes; c__Clostridia; o__Clostridiales; f__Ruminococcaceae; g__Oscillospira; s__	VFM	5.21e-08	0.0232114	-0.127231	3.59e-06	1.06e-06	0.0155195	-0.0761437	0.249889	6.66e-05	-0.0633563	Yes
4402903	k__Bacteria; p__Firmicutes; c__Clostridia; o__Clostridiales; f__Christensenellaceae; g__; s__	VFM	6.3e-08	0.0228552	-0.125177	4.21e-06	3.86e-05	0.0153048	-0.063248	0.232966	0.00192432	-0.0316393	Yes
178845	k__Bacteria; p__Firmicutes; c__Clostridia; o__Clostridiales; f__Ruminococcaceae; g__; s__	VFM	6.91e-08	0.0238935	-0.130503	4.47e-06	0.000743084	0.0159992	-0.0542973	0.257978	0.000832783	0.019069	No
352014	k__Bacteria; p__Firmicutes; c__Clostridia; o__Clostridiales; f__Ruminococcaceae; g__Oscillospira; s__	AGR	7.26e-08	0.0215743	-0.11716	3.34e-05	0.000604571	0.0188795	-0.0650308	0.3643	5.17e-05	-0.146198	Yes
New.0.CleanUp.ReferenceOTU33470	k__Bacteria; p__Firmicutes; c__Clostridia; o__Clostridiales; f__Ruminococcaceae; g__Ruminococcus; s__	AGR	7.46e-08	0.0203865	-0.110326	3.34e-05	5.78e-05	0.0178425	-0.0720456	0.191503	2.04e-05	-0.0899952	Yes
178845	k__Bacteria; p__Firmicutes; c__Clostridia; o__Clostridiales; f__Ruminococcaceae; g__; s__	AGR	7.81e-08	0.022036	-0.119336	3.34e-05	2.14e-05	0.0190163	-0.0811468	0.257978	0.000832783	-0.131398	Yes
194488	k__Bacteria; p__Firmicutes; c__Clostridia; o__Clostridiales; f__Ruminococcaceae; g__; s__	VFM	7.94e-08	0.0228954	-0.123674	4.99e-06	0.00842495	0.0155782	-0.0411843	0.131095	5.94e-05	0.0283592	No
New.0.CleanUp.ReferenceOTU9470	k__Bacteria; p__Firmicutes; c__Clostridia; o__Clostridiales; f__; g__; s__	VFM	8.56e-08	0.0229522	-0.125459	5.22e-06	2.48e-05	0.0156219	-0.0663953	2.85e-13	1.02e-05	0.0256426	No
555547	k__Bacteria; p__Firmicutes; c__Clostridia; o__Clostridiales; f__Christensenellaceae; g__; s__	VFM	1.04e-07	0.0223962	-0.119819	6.16e-06	0.000352619	0.0151914	-0.0544187	0.184002	5.97e-05	-0.0817434	Yes
4375889	k__Bacteria; p__Firmicutes; c__Clostridia; o__Clostridiales; f__Ruminococcaceae; g__; s__	VFM	1.09e-07	0.0231638	-0.123997	6.31e-06	1.59e-05	0.0156048	-0.0676219	0.218817	4.62e-05	-0.00791117	Yes
4450214	k__Bacteria; p__Firmicutes; c__Clostridia; o__Clostridiales; f__Ruminococcaceae; g__; s__	VFM	1.23e-07	0.0234182	-0.124948	6.75e-06	0.000545373	0.0157449	-0.0545718	0.156653	0.000780812	-0.022284	Yes
187917	k__Bacteria; p__Firmicutes; c__Clostridia; o__Clostridiales; f__Ruminococcaceae; g__; s__	VFM	1.24e-07	0.0231259	-0.123278	6.75e-06	7.07e-05	0.0155285	-0.0620552	0.1323	0.000169438	-0.0545845	Yes
4349261	k__Bacteria; p__Firmicutes; c__Clostridia; o__Clostridiales; f__Lachnospiraceae; g__; s__	pTF	1.24e-07	0.0226274	-0.121083	0.000264637	0.204941	0.0180739	-0.0229845	0.255591	0.000282833	0.0282832	No
194733	k__Bacteria; p__Firmicutes; c__Clostridia; o__Clostridiales; f__Lachnospiraceae; g__Blautia; s__	VFM	1.27e-07	0.0225357	0.120037	6.75e-06	5.23e-05	0.0152641	0.0620523	0.0212044	4.88e-05	-0.0196055	No
372146	k__Bacteria; p__Firmicutes; c__Clostridia; o__Clostridiales; f__Ruminococcaceae; g__Oscillospira; s__	BMI	1.61e-07	0.023175	-0.122115	0.000344436	NA	NA	NA	0.161324	1.24e-05	-0.0234957	Yes
537219	k__Bacteria; p__Firmicutes; c__Clostridia; o__Clostridiales; f__; g__; s__	VFM	1.78e-07	0.0230074	-0.121104	9.27e-06	3.22e-05	0.0154407	-0.0644209	0.262063	6.04e-05	-0.082526	Yes
581201	k__Bacteria; p__Firmicutes; c__Clostridia; o__Clostridiales; f__Ruminococcaceae; g__; s__	SFM	1.82e-07	0.0233024	-0.122264	0.000129343	0.000189339	0.0131024	-0.0490468	0.13114	0.000127378	-0.00799684	Yes
193129	k__Bacteria; p__Firmicutes; c__Clostridia; o__Clostridiales; f__Lachnospiraceae; g__; s__	VFM	1.99e-07	0.0231732	-0.121141	1.01e-05	0.000143613	0.015485	-0.0590451	0.135666	0.00177813	-0.037697	Yes
2835813	k__Bacteria; p__Firmicutes; c__Clostridia; o__Clostridiales; f__Ruminococcaceae; g__; s__	AGR	2.29e-07	0.0205992	-0.107206	8.16e-05	0.000927455	0.0179117	-0.0594461	0.117672	9.65e-05	-0.0735913	Yes
190490	k__Bacteria; p__Firmicutes; c__Clostridia; o__Clostridiales; f__Ruminococcaceae; g__; s__	VFM	2.56e-07	0.0220233	-0.114129	1.27e-05	0.00296256	0.0150482	-0.0448135	0.066422	2.64e-05	-0.109692	Yes
372146	k__Bacteria; p__Firmicutes; c__Clostridia; o__Clostridiales; f__Ruminococcaceae; g__Oscillospira; s__	pTF	2.61e-07	0.0221586	-0.115005	0.000278765	0.0395803	0.0176707	-0.0366948	0.161324	1.24e-05	-0.0993209	Yes
338105	k__Bacteria; p__Firmicutes; c__Clostridia; o__Clostridiales; f__Christensenellaceae; g__; s__	VFM	2.91e-07	0.0229003	-0.11837	1.41e-05	9.48e-05	0.0154763	-0.0606099	0.205206	2.69e-05	0.0377703	No
194733	k__Bacteria; p__Firmicutes; c__Clostridia; o__Clostridiales; f__Lachnospiraceae; g__Blautia; s__	AGR	3.11e-07	0.0205267	0.105791	9.33e-05	0.000169397	0.0178044	0.0671977	0.0212044	4.88e-05	0.115342	Yes
178845	k__Bacteria; p__Firmicutes; c__Clostridia; o__Clostridiales; f__Ruminococcaceae; g__; s__	SFM	3.12e-07	0.0239534	-0.12357	0.000166288	0.000492401	0.0133189	-0.0467287	0.257978	0.000832783	-0.0527542	Yes
316732	k__Bacteria; p__Firmicutes; c__Clostridia; o__Clostridiales; f__Lachnospiraceae; g__Lachnospira; s__	VFM	3.41e-07	0.022347	-0.114763	1.62e-05	0.0218457	0.0152165	-0.0349503	0.0338117	0.00197979	-0.0215092	Yes
147100	k__Bacteria; p__Firmicutes; c__Clostridia; o__Clostridiales; f__Ruminococcaceae; g__; s__	AGR	3.82e-07	0.0215197	-0.110113	9.33e-05	0.000586084	0.018696	-0.0644989	0.336149	7.64e-05	-0.094988	Yes
195494	k__Bacteria; p__Firmicutes; c__Clostridia; o__Clostridiales; f__Ruminococcaceae; g__; s__	AGR	3.93e-07	0.0206054	-0.105097	9.33e-05	6.67e-06	0.0177959	-0.0805368	0.0582024	2.51e-05	-0.181795	Yes
New.0.CleanUp.ReferenceOTU20932	k__Bacteria; p__Firmicutes; c__Clostridia; o__Clostridiales; f__Ruminococcaceae; g__; s__	VFM	4.34e-07	0.02222	-0.11291	2.01e-05	2.2e-05	0.0149082	-0.0637299	0.0923268	6.76e-06	-0.172629	Yes
352014	k__Bacteria; p__Firmicutes; c__Clostridia; o__Clostridiales; f__Ruminococcaceae; g__Oscillospira; s__	pTF	4.48e-07	0.0231683	-0.11797	0.000318896	0.0325271	0.0185396	-0.0397308	0.3643	5.17e-05	-0.0513072	Yes
389371	k__Bacteria; p__Firmicutes; c__Clostridia; o__Clostridiales; f__; g__; s__	VFM	4.61e-07	0.022536	-0.114205	2.09e-05	0.00311134	0.0153449	-0.0455684	1.21e-12	7.04e-05	-0.0584632	Yes
581201	k__Bacteria; p__Firmicutes; c__Clostridia; o__Clostridiales; f__Ruminococcaceae; g__; s__	AGR	4.85e-07	0.0214276	-0.108676	0.000103578	0.000144609	0.0186156	-0.0710119	0.13114	0.000127378	-0.0657779	Yes
New.0.CleanUp.ReferenceOTU25576	k__Bacteria; p__Firmicutes; c__Clostridia; o__Clostridiales; f__; g__; s__	VFM	4.97e-07	0.0228532	-0.115853	2.21e-05	0.0116302	0.0154955	-0.0391752	0.149815	3.29e-05	-0.0156072	Yes
215468	k__Bacteria; p__Firmicutes; c__Clostridia; o__Clostridiales; f__Ruminococcaceae; g__; s__	VFM	5.33e-07	0.0232285	-0.117829	2.32e-05	0.00144833	0.0156511	-0.0502335	0.354753	3.01e-05	0.0109746	No
4398588	k__Bacteria; p__Firmicutes; c__Clostridia; o__Clostridiales; f__Ruminococcaceae; g__; s__	SFM	5.77e-07	0.0226825	-0.11426	0.000236036	0.076873	0.0128192	-0.0227241	0.26085	0.000115165	-0.200584	Yes
197540	k__Bacteria; p__Firmicutes; c__Clostridia; o__Clostridiales; f__Ruminococcaceae; g__; s__	VFM	5.81e-07	0.0229617	-0.115531	2.48e-05	0.000371911	0.0154913	-0.0553634	0.0935197	1.27e-05	-0.0384376	Yes
4468466	k__Bacteria; p__Firmicutes; c__Clostridia; o__Clostridiales; f__Ruminococcaceae; g__; s__	AGR	6.04e-07	0.0215007	-0.10882	0.000117215	0.000283822	0.0185341	-0.0678564	0.33919	0.00203009	-0.0244787	Yes
New.0.CleanUp.ReferenceOTU33470	k__Bacteria; p__Firmicutes; c__Clostridia; o__Clostridiales; f__Ruminococcaceae; g__Ruminococcus; s__	SFM	6.63e-07	0.0223688	-0.111976	0.000236036	0.00420856	0.0127946	-0.0367018	0.191503	2.04e-05	-0.189111	Yes
183698	k__Bacteria; p__Firmicutes; c__Clostridia; o__Clostridiales; f__Lachnospiraceae; g__; s__	VFM	7.28e-07	0.0227938	0.113669	3.02e-05	0.000302405	0.0154622	0.0561101	0.156855	5.91e-05	-0.00908415	No
300620	k__Bacteria; p__Firmicutes; c__Clostridia; o__Clostridiales; f__Ruminococcaceae; g__; s__	VFM	7.36e-07	0.0223492	-0.111503	3.02e-05	0.000228442	0.0151557	-0.0561651	0.126867	0.000377165	-0.145743	Yes
New.0.CleanUp.ReferenceOTU20603	k__Bacteria; p__Bacteroidetes; c__Bacteroidia; o__Bacteroidales; f__Rikenellaceae; g__; s__	VFM	7.79e-07	0.0221949	-0.110799	3.14e-05	0.106674	0.0152004	-0.0245943	0.000690951	1.85e-05	-0.0502412	Yes
196905	k__Bacteria; p__Firmicutes; c__Clostridia; o__Clostridiales; f__Ruminococcaceae; g__; s__	VFM	8.29e-07	0.0220328	-0.109832	3.28e-05	0.000889486	0.0149375	-0.0498445	0.0998114	2.01e-05	-0.0665055	Yes
44151	k__Bacteria; p__Firmicutes; c__Clostridia; o__Clostridiales; f__Ruminococcaceae; g__; s__	AGR	8.41e-07	0.02067	-0.102288	0.000137527	0.0015806	0.0180696	-0.0573164	0.130021	3.24e-05	-0.0856556	Yes
323903	k__Bacteria; p__Firmicutes; c__Clostridia; o__Clostridiales; f__Ruminococcaceae; g__; s__	VFM	8.62e-07	0.0227494	-0.112479	3.32e-05	0.0146582	0.0155551	-0.0380878	9.24e-15	7.25e-05	-0.105928	Yes
182116	k__Bacteria; p__Firmicutes; c__Clostridia; o__Clostridiales; f__Lachnospiraceae; g__[Ruminococcus]; s__	VFM	8.7e-07	0.0222044	0.110797	3.32e-05	4.81e-05	0.0149917	0.0612592	0.0176561	8.88e-05	-0.0303775	No
4398588	k__Bacteria; p__Firmicutes; c__Clostridia; o__Clostridiales; f__Ruminococcaceae; g__; s__	AGR	8.94e-07	0.0208248	-0.10287	0.000137527	0.00820443	0.0180935	-0.0479504	0.26085	0.000115165	-0.0815271	Yes
4469576	k__Bacteria; p__Firmicutes; c__Clostridia; o__Clostridiales; f__Lachnospiraceae; g__; s__	VFM	8.96e-07	0.023217	0.114809	3.35e-05	6.66e-05	0.0156068	0.0625095	0.19087	0.000346233	0.120851	Yes
194488	k__Bacteria; p__Firmicutes; c__Clostridia; o__Clostridiales; f__Ruminococcaceae; g__; s__	AGR	9.02e-07	0.0209697	-0.103482	0.000137527	0.00701698	0.0183431	-0.0495578	0.131095	5.94e-05	-0.0241647	Yes
198248	k__Bacteria; p__Firmicutes; c__Clostridia; o__Clostridiales; f__Ruminococcaceae; g__; s__	VFM	9.13e-07	0.0230382	-0.113837	3.36e-05	0.00552738	0.0155243	-0.0432853	0.227782	0.000165352	-0.0526069	Yes
4370941	k__Bacteria; p__Firmicutes; c__Clostridia; o__Clostridiales; f__Ruminococcaceae; g__; s__	pTF	9.3e-07	0.022541	-0.11146	0.000496177	0.0368038	0.0179455	-0.0375477	0.245757	6.42e-05	-0.0813522	Yes
4465124	k__Bacteria; p__Firmicutes; c__Clostridia; o__Clostridiales; f__Clostridiaceae; g__Clostridium; s__	SFM	9.49e-07	0.0227607	-0.11222	0.000289326	0.0191593	0.0129394	-0.0303643	0.238587	0.00231379	-0.0212188	Yes
3195723	k__Bacteria; p__Firmicutes; c__Clostridia; o__Clostridiales; f__Ruminococcaceae; g__Oscillospira; s__	BMI	9.69e-07	0.0233209	-0.114852	0.00103477	NA	NA	NA	0.246004	0.000144442	-0.121328	Yes
321453	k__Bacteria; p__Firmicutes; c__Clostridia; o__Clostridiales; f__Lachnospiraceae; g__Blautia; s__	VFM	1.01e-06	0.0222085	0.109183	3.6e-05	7.01e-06	0.0150646	0.0680965	2.28e-10	1.3e-05	0.0833119	Yes
182196	k__Bacteria; p__Firmicutes; c__Clostridia; o__Clostridiales; f__; g__; s__	VFM	1.02e-06	0.0221097	0.108664	3.6e-05	0.00936291	0.0150612	0.0392604	1.37e-13	1.19e-05	0.0340173	Yes
176269	k__Bacteria; p__Firmicutes; c__Clostridia; o__Clostridiales; f__Lachnospiraceae; g__Lachnospira; s__	VFM	1.03e-06	0.0222565	-0.109262	3.6e-05	0.000329781	0.0150713	-0.0543223	0.144058	0.00177619	-0.0571255	Yes
New.0.CleanUp.ReferenceOTU34809	k__Bacteria; p__Firmicutes; c__Clostridia; o__Clostridiales; f__Ruminococcaceae; g__; s__	VFM	1.05e-06	0.0231553	-0.113717	3.6e-05	0.000680248	0.0155958	-0.0531791	0.22806	1.46e-05	-0.00705556	Yes
192385	k__Bacteria; p__Firmicutes; c__Clostridia; o__Clostridiales; f__Christensenellaceae; g__; s__	VFM	1.06e-06	0.0229154	-0.112406	3.61e-05	0.000215144	0.0155012	-0.0575248	0.235773	2.39e-05	-0.0651052	Yes
4370941	k__Bacteria; p__Firmicutes; c__Clostridia; o__Clostridiales; f__Ruminococcaceae; g__; s__	AGR	1.07e-06	0.0210625	-0.103438	0.000152948	9.44e-05	0.0183485	-0.0720566	0.245757	6.42e-05	-0.0636591	Yes
287790	k__Bacteria; p__Firmicutes; c__Clostridia; o__Clostridiales; f__Ruminococcaceae; g__; s__	VFM	1.08e-06	0.0233428	-0.115012	3.61e-05	0.000724818	0.015727	-0.05334	0.136595	0.000703199	0.0286086	No
199286	k__Bacteria; p__Firmicutes; c__Clostridia; o__Clostridiales; f__; g__; s__	VFM	1.15e-06	0.0226484	-0.110939	3.76e-05	0.0424508	0.015478	-0.0314611	0.0515982	8.89e-05	-0.00394429	Yes
178117	k__Bacteria; p__Firmicutes; c__Clostridia; o__Clostridiales; f__Ruminococcaceae; g__Ruminococcus; s__	VFM	1.16e-06	0.0223558	-0.109496	3.76e-05	4.11e-06	0.0150497	-0.0696424	2.37e-14	6.8e-05	-0.0845895	Yes
181702	k__Bacteria; p__Firmicutes; c__Clostridia; o__Clostridiales; f__; g__; s__	SFM	1.18e-06	0.0223197	-0.109456	0.000292395	0.0291934	0.0127967	-0.0281582	0.131883	9.08e-06	-0.220328	Yes
New.0.CleanUp.ReferenceOTU32262	k__Bacteria; p__Firmicutes; c__Clostridia; o__Clostridiales; f__Lachnospiraceae; g__Blautia; s__	VFM	1.2e-06	0.022071	0.107745	3.82e-05	0.000396927	0.0150449	0.0534494	0.123903	7.36e-06	0.112784	Yes
197890	k__Bacteria; p__Firmicutes; c__Clostridia; o__Clostridiales; f__Ruminococcaceae; g__Oscillospira; s__	SFM	1.23e-06	0.0228552	-0.111864	0.000292395	0.563344	0.0129523	-0.00750962	0.207933	6.54e-05	-0.104731	Yes
181702	k__Bacteria; p__Firmicutes; c__Clostridia; o__Clostridiales; f__; g__; s__	VFM	1.27e-06	0.0223817	-0.109008	3.98e-05	0.0100102	0.0152831	-0.0394394	0.131883	9.08e-06	-0.0548843	Yes
3195723	k__Bacteria; p__Firmicutes; c__Clostridia; o__Clostridiales; f__Ruminococcaceae; g__Oscillospira; s__	AGR	1.4e-06	0.0207266	-0.100608	0.000186827	0.0097329	0.0180628	-0.0467884	0.246004	0.000144442	-0.0856459	Yes
4321810	k__Bacteria; p__Firmicutes; c__Clostridia; o__Clostridiales; f__Lachnospiraceae; g__Blautia; s__	VFM	1.47e-06	0.0228174	0.110619	4.56e-05	0.000224157	0.0153467	0.0569884	0.162602	0.000428052	0.0316533	Yes
232030	k__Bacteria; p__Firmicutes; c__Clostridia; o__Clostridiales; f__Lachnospiraceae; g__Coprococcus; s__	VFM	1.51e-06	0.0230093	-0.111438	4.57e-05	0.000565906	0.0153545	-0.0530864	0.230808	5.48e-05	0.00479684	No
3856408	k__Bacteria; p__Firmicutes; c__Clostridia; o__Clostridiales; f__Lachnospiraceae; g__; s__	VFM	1.52e-06	0.0229127	-0.110676	4.57e-05	0.00288864	0.0154734	-0.0461892	0.0710017	0.000422432	0.0222886	No
4433737	k__Bacteria; p__Firmicutes; c__Clostridia; o__Clostridiales; f__Lachnospiraceae; g__; s__	SFM	1.56e-06	0.0223106	0.107672	0.000333336	0.133427	0.012757	0.0192319	0.115925	9.95e-06	0.109977	Yes
195494	k__Bacteria; p__Firmicutes; c__Clostridia; o__Clostridiales; f__Ruminococcaceae; g__; s__	VFM	1.67e-06	0.0225931	-0.10881	4.96e-05	8.57e-07	0.0151663	-0.0750801	0.0582024	2.51e-05	-0.0964598	Yes
3422630	k__Bacteria; p__Firmicutes; c__Clostridia; o__Clostridiales; f__Ruminococcaceae; g__; s__	VFM	1.71e-06	0.0224773	-0.108066	4.96e-05	0.000182824	0.0151592	-0.0569668	0.13066	5.97e-05	-0.109382	Yes
193969	k__Bacteria; p__Firmicutes; c__Clostridia; o__Clostridiales; f__Lachnospiraceae; g__Coprococcus; s__	VFM	1.75e-06	0.0216032	-0.103768	4.96e-05	0.0364554	0.01473	-0.0308524	0.126917	0.000403619	-0.162549	Yes
190100	k__Bacteria; p__Firmicutes; c__Clostridia; o__Clostridiales; f__Lachnospiraceae; g__Blautia; s__	VFM	1.76e-06	0.0224217	0.108243	4.96e-05	5.34e-06	0.0152442	0.0702934	0.195996	4.66e-05	0.0597523	Yes
232030	k__Bacteria; p__Firmicutes; c__Clostridia; o__Clostridiales; f__Lachnospiraceae; g__Coprococcus; s__	AGR	1.81e-06	0.0210407	-0.100948	0.00022728	0.000257488	0.0180427	-0.0661436	0.230808	5.48e-05	-0.0759843	Yes
2835813	k__Bacteria; p__Firmicutes; c__Clostridia; o__Clostridiales; f__Ruminococcaceae; g__; s__	SFM	1.81e-06	0.0226188	-0.108628	0.000350819	0.046162	0.0128253	-0.0256658	0.117672	9.65e-05	-0.0583683	Yes
199286	k__Bacteria; p__Firmicutes; c__Clostridia; o__Clostridiales; f__; g__; s__	pTF	1.81e-06	0.0223403	-0.107328	0.000770987	0.307564	0.0178674	-0.0182405	0.0515982	8.89e-05	-0.0363631	Yes
2256425	k__Bacteria; p__Firmicutes; c__Clostridia; o__Clostridiales; f__Christensenellaceae; g__; s__	VFM	1.83e-06	0.0223161	-0.106966	4.96e-05	0.000296577	0.0151471	-0.0549874	0.011354	6.13e-05	-0.0817436	Yes
190864	k__Bacteria; p__Firmicutes; c__Clostridia; o__Clostridiales; f__; g__; s__	VFM	1.83e-06	0.022361	0.10781	4.96e-05	0.000375889	0.0150663	0.0537308	0.0994618	1.18e-05	0.0218402	Yes
4478840	k__Bacteria; p__Firmicutes; c__Clostridia; o__Clostridiales; f__Clostridiaceae; g__; s__	VFM	1.85e-06	0.0231804	-0.111152	4.96e-05	0.00083661	0.0155249	-0.0520102	0.265935	0.000110821	-0.0684528	Yes
189820	k__Bacteria; p__Firmicutes; c__Clostridia; o__Clostridiales; f__Ruminococcaceae; g__Ruminococcus; s__	VFM	1.86e-06	0.022979	-0.11018	4.96e-05	4.77e-05	0.0153796	-0.0627646	0.313508	2.05e-05	-0.0409846	Yes
178478	k__Bacteria; p__Bacteroidetes; c__Bacteroidia; o__Bacteroidales; f__Bacteroidaceae; g__Bacteroides; s__	VFM	1.86e-06	0.0228345	-0.109816	4.96e-05	0.0172947	0.0154873	-0.037024	0.215423	0.000301383	-0.0760348	Yes
199421	k__Bacteria; p__Firmicutes; c__Clostridia; o__Clostridiales; f__Lachnospiraceae; g__Lachnospira; s__	VFM	2.05e-06	0.0226586	-0.108377	5.34e-05	0.00136974	0.0152687	-0.049167	0.148641	9.53e-06	-0.0515733	Yes
New.0.CleanUp.ReferenceOTU6169	k__Bacteria; p__Firmicutes; c__Clostridia; o__Clostridiales; f__Ruminococcaceae; g__Oscillospira; s__	VFM	2.1e-06	0.0226316	-0.108065	5.34e-05	0.000106804	0.015452	-0.0600694	0.2026	7.77e-06	-0.0205985	Yes
584107	k__Bacteria; p__Firmicutes; c__Clostridia; o__Clostridiales; f__; g__; s__	VFM	2.1e-06	0.0235886	-0.112693	5.34e-05	0.000130111	0.0158204	-0.060846	0.301852	0.000118188	-0.0463387	Yes
216710	k__Bacteria; p__Firmicutes; c__Clostridia; o__Clostridiales; f__Ruminococcaceae; g__; s__	VFM	2.11e-06	0.022604	-0.107695	5.34e-05	0.000347815	0.015264	-0.0547808	0.165016	0.000170148	-0.0588672	Yes
322835	k__Bacteria; p__Firmicutes; c__Clostridia; o__Clostridiales; f__Lachnospiraceae; g__Lachnospira; s__	VFM	2.12e-06	0.022601	-0.107904	5.34e-05	0.0178656	0.0153742	-0.0365051	2.83e-13	5.88e-05	-0.103955	Yes
182116	k__Bacteria; p__Firmicutes; c__Clostridia; o__Clostridiales; f__Lachnospiraceae; g__[Ruminococcus]; s__	AGR	2.13e-06	0.0202	0.096836	0.000251403	0.000215165	0.0173925	0.0646418	0.0176561	8.88e-05	0.00752745	Yes
4349261	k__Bacteria; p__Firmicutes; c__Clostridia; o__Clostridiales; f__Lachnospiraceae; g__; s__	SFM	2.17e-06	0.0230568	-0.110182	0.000371233	0.0893415	0.0130683	-0.0222999	0.255591	0.000282833	-0.118137	Yes
197890	k__Bacteria; p__Firmicutes; c__Clostridia; o__Clostridiales; f__Ruminococcaceae; g__Oscillospira; s__	BMI	2.21e-06	0.0234647	-0.112158	0.00113791	NA	NA	NA	0.207933	6.54e-05	-0.186033	Yes
New.0.CleanUp.ReferenceOTU26796	k__Bacteria; p__Firmicutes; c__Clostridia; o__Clostridiales; f__Lachnospiraceae; g__Lachnospira; s__	AGR	2.24e-06	0.0207534	-0.0986163	0.000251403	0.000259241	0.0180168	-0.0660951	0.0341262	3.35e-05	-0.0598925	Yes
194733	k__Bacteria; p__Firmicutes; c__Clostridia; o__Clostridiales; f__Lachnospiraceae; g__Blautia; s__	SFM	2.26e-06	0.0225663	0.107218	0.000371233	0.00288628	0.0128188	0.0382809	0.0212044	4.88e-05	0.0827604	Yes
540055	k__Bacteria; p__Firmicutes; c__Clostridia; o__Clostridiales; f__Ruminococcaceae; g__; s__	VFM	2.33e-06	0.023101	-0.109824	5.77e-05	0.000133164	0.0155485	-0.0596992	0.31562	0.000626777	-0.056714	Yes
189924	k__Bacteria; p__Firmicutes; c__Clostridia; o__Clostridiales; f__Ruminococcaceae; g__; s__	AGR	2.41e-06	0.0204324	-0.0970688	0.000257456	0.00078131	0.017677	-0.0597159	0.118994	4.79e-05	-0.0985253	Yes
New.0.CleanUp.ReferenceOTU15088	k__Bacteria; p__Firmicutes; c__Clostridia; o__Clostridiales; f__Ruminococcaceae; g__; s__	VFM	2.43e-06	0.0229023	-0.108844	5.97e-05	5.41e-06	0.0153001	-0.0700719	0.21183	0.000176258	0.0163066	No
177153	k__Bacteria; p__Firmicutes; c__Clostridia; o__Clostridiales; f__; g__; s__	VFM	2.65e-06	0.0227685	-0.107651	6.42e-05	0.000618853	0.0154463	-0.0531009	0.1605	0.000315188	-0.0853901	Yes
194488	k__Bacteria; p__Firmicutes; c__Clostridia; o__Clostridiales; f__Ruminococcaceae; g__; s__	BMI	2.65e-06	0.0236561	-0.111604	0.00113791	NA	NA	NA	0.131095	5.94e-05	-0.104519	Yes
313524	k__Bacteria; p__Firmicutes; c__Clostridia; o__Clostridiales; f__Ruminococcaceae; g__; s__	SFM	2.67e-06	0.0233003	-0.110108	0.000393249	0.120835	0.0131361	-0.0204062	0.30237	5.12e-05	-0.0318542	Yes
182797	k__Bacteria; p__Firmicutes; c__Clostridia; o__Clostridiales; f__Ruminococcaceae; g__; s__	VFM	2.68e-06	0.0227681	-0.107712	6.42e-05	0.00933031	0.0153005	-0.0402574	0.263744	0.000136446	0.0354735	No
New.0.CleanUp.ReferenceOTU6086	k__Bacteria; p__Firmicutes; c__Clostridia; o__Clostridiales; f__Ruminococcaceae; g__Oscillospira; s__	VFM	2.74e-06	0.0225123	-0.106064	6.49e-05	1.04e-05	0.0152073	-0.0673196	5.52e-14	1.34e-05	-0.012792	Yes
189924	k__Bacteria; p__Firmicutes; c__Clostridia; o__Clostridiales; f__Ruminococcaceae; g__; s__	SFM	2.76e-06	0.0224645	-0.106125	0.000393249	0.0380582	0.0127599	-0.0265467	0.118994	4.79e-05	-0.146408	Yes
184940	k__Bacteria; p__Firmicutes; c__Clostridia; o__Clostridiales; f__Christensenellaceae; g__; s__	VFM	2.77e-06	0.0230346	-0.1088	6.5e-05	0.000120105	0.0154645	-0.0597185	0.244828	5.29e-05	0.0586378	No
4153054	k__Bacteria; p__Firmicutes; c__Clostridia; o__Clostridiales; f__Ruminococcaceae; g__; s__	AGR	2.77e-06	0.0207789	-0.0983227	0.000281469	0.00137433	0.0179418	-0.057914	0.160684	0.000600406	-0.130105	Yes
179325	k__Bacteria; p__Firmicutes; c__Clostridia; o__Clostridiales; f__Ruminococcaceae; g__; s__	VFM	2.93e-06	0.0223332	-0.10489	6.81e-05	2.43e-05	0.0150161	-0.0636181	0.0351525	2.83e-05	-0.0421341	Yes
299407	k__Bacteria; p__Firmicutes; c__Clostridia; o__Clostridiales; f__Ruminococcaceae; g__; s__	VFM	2.98e-06	0.0235886	-0.110867	6.85e-05	3.6e-07	0.0157247	-0.0804556	0.151738	9.48e-05	-0.0791374	Yes
352014	k__Bacteria; p__Firmicutes; c__Clostridia; o__Clostridiales; f__Ruminococcaceae; g__Oscillospira; s__	BMI	3e-06	0.024429	-0.114958	0.00113791	NA	NA	NA	0.3643	5.17e-05	-0.131231	Yes
New.0.CleanUp.ReferenceOTU32262	k__Bacteria; p__Firmicutes; c__Clostridia; o__Clostridiales; f__Lachnospiraceae; g__Blautia; s__	AGR	3.05e-06	0.0201132	0.0943008	0.000295921	0.00174153	0.0175648	0.0551852	0.123903	7.36e-06	0.0881531	Yes
147100	k__Bacteria; p__Firmicutes; c__Clostridia; o__Clostridiales; f__Ruminococcaceae; g__; s__	SFM	3.09e-06	0.023404	-0.109693	0.000412877	0.0223543	0.0131211	-0.0300455	0.336149	7.64e-05	-0.00928948	Yes
197402	k__Bacteria; p__Firmicutes; c__Clostridia; o__Clostridiales; f__Lachnospiraceae; g__Blautia; s__	SFM	3.36e-06	0.0220144	0.103532	0.000422228	0.000118777	0.0126141	0.0486914	4.29e-14	1.51e-05	0.106795	Yes
300618	k__Bacteria; p__Firmicutes; c__Clostridia; o__Clostridiales; f__; g__; s__	VFM	3.4e-06	0.0224932	-0.104929	7.64e-05	0.00944799	0.015228	-0.0396116	0.114701	0.00058255	-0.0212781	Yes
New.0.CleanUp.ReferenceOTU5899	k__Bacteria; p__Firmicutes; c__Clostridia; o__Clostridiales; f__Christensenellaceae; g__; s__	VFM	3.43e-06	0.0223725	-0.104448	7.64e-05	0.000581611	0.0151262	-0.0521606	3e-13	5.58e-06	-0.106205	Yes
197890	k__Bacteria; p__Firmicutes; c__Clostridia; o__Clostridiales; f__Ruminococcaceae; g__Oscillospira; s__	VFM	3.43e-06	0.0228335	-0.106937	7.64e-05	0.444348	0.0154879	-0.0118826	0.207933	6.54e-05	-0.155649	Yes
4349261	k__Bacteria; p__Firmicutes; c__Clostridia; o__Clostridiales; f__Lachnospiraceae; g__; s__	AGR	3.7e-06	0.0211156	-0.0983499	0.000343466	0.00577563	0.0183686	-0.0508347	0.255591	0.000282833	-0.159507	Yes
New.0.CleanUp.ReferenceOTU43313	k__Bacteria; p__Firmicutes; c__Clostridia; o__Clostridiales; f__Ruminococcaceae; g__; s__	VFM	3.75e-06	0.023337	-0.108407	8.25e-05	0.0013162	0.0158639	-0.0511634	0.134245	1.63e-05	0.0508865	No
316732	k__Bacteria; p__Firmicutes; c__Clostridia; o__Clostridiales; f__Lachnospiraceae; g__Lachnospira; s__	BMI	3.76e-06	0.023081	-0.107344	0.00113791	NA	NA	NA	0.0338117	0.00197979	-0.0348399	Yes
199286	k__Bacteria; p__Firmicutes; c__Clostridia; o__Clostridiales; f__; g__; s__	BMI	3.79e-06	0.0233852	-0.108713	0.00113791	NA	NA	NA	0.0515982	8.89e-05	-0.0744821	Yes

## Sheet: Supplementary Table 3
Supplementary Table 3. Genus-level associations with adiposity, where the collapsed taxonomy OTU genus was significantly associated with adiposity. Reported phenotypes are visceral fat (VFM), subcutaneous fat (SFM), android:gynoid ratio (AGR), and BMI.
Taxonomy	Phenotype	Level	P Value	Std Err	Estimate
k__Bacteria.p__Firmicutes.c__Clostridia.o__Clostridiales.f__Ruminococcaceae.g__Oscillospira	VFM	Genus	3.29e-07	0.0224295	-0.115259
k__Bacteria.p__Firmicutes.c__Clostridia.o__Clostridiales.f__Lachnospiraceae.g__Blautia	VFM	Genus	3.65e-06	0.0228886	0.106642
k__Bacteria.p__Firmicutes.c__Clostridia.o__Clostridiales.f__Ruminococcaceae.g__Oscillospira	AGR	Genus	8.67e-06	0.020489	-0.0916418
k__Bacteria.p__Firmicutes.c__Clostridia.o__Clostridiales.f__Lachnospiraceae.g__Lachnospira	VFM	Genus	2.14e-05	0.022606	-0.0965688
k__Bacteria.p__Firmicutes.c__Clostridia.o__Clostridiales.f__Lachnospiraceae.g__.Ruminococcus.	BMI	Genus	3.51e-05	0.0240879	0.100384
k__Bacteria.p__Firmicutes.c__Clostridia.o__Clostridiales.f__Ruminococcaceae.g__Oscillospira	SFM	Genus	7.52e-05	0.0225376	-0.0897216
k__Bacteria.p__Firmicutes.c__Clostridia.o__Clostridiales.f__Lachnospiraceae.g__.Ruminococcus.	VFM	Genus	0.000114841	0.0232097	0.0902658
k__Bacteria.p__Firmicutes.c__Clostridia.o__Clostridiales.f__Ruminococcaceae.g__Oscillospira	BMI	Genus	0.000130609	0.0234368	-0.0900265
k__Bacteria.p__Firmicutes.c__Clostridia.o__Clostridiales.f__Lachnospiraceae.g__Blautia	AGR	Genus	0.000329501	0.0210131	0.0759139
k__Bacteria.p__Firmicutes.c__Clostridia.o__Clostridiales.f__Lachnospiraceae.g__Lachnospira	AGR	Genus	0.000331485	0.0206144	-0.074318
k__Bacteria.p__Firmicutes.c__Clostridia.o__Clostridiales.f__Clostridiaceae.g__Clostridium	VFM	Genus	0.000973538	0.022841	-0.0756645

## Sheet: Supplementary Table 4
Supplementary Table 4. Replication of TwinsUK (TUK-D) results in 3 independent cohorts, the American Gut (AG), the Flemish Gut Flora Project (FGFP) and the expanded TwinsUK dataset (TUK-R). The Table lists the 97 OTUs forming 149 significant adiposity associations in TwinsUK, and their association with BMI in both the replication and discovery samples. In addition the table outlines the results o…
OTU	Taxonomy	TUK-D			AG			FGFP			TUK-R			Meta-analysis of independent cohorts							Meta-analysis of independent cohorts and TUK-D							Replicate at P = 0.05 with same direction of effect
		P Value	Beta	SE	P Value	Beta	SE	P Value	Beta	SE	P Value	Beta	SE	P Value	Beta	SE	I2	Q	Q P Value	Replicated	P Value	Beta	SE	I2	Q	Q P Value	Stronger in Meta-analysis	AG	FGFP	TUK_R	Replicated in at least 1 cohort
New.0.CleanUp.ReferenceOTU9470	k__Bacteria; p__Firmicutes; c__Clostridia; o__Clostridiales; f__; g__; s__	3.48775e-05	-0.10006	0.0239741	1.31e-72	-0.100507	0.006	0.0256	-0.17017	0.07613	0.454047	-0.09418	0.125715	5.19552e-64	-0.100922	0.00597469	0	0.83504	0.658678	1	8.33e-68	-0.100871	0.00579737	0	0.836256	0.840777	1	1	1	0	1
New.0.CleanUp.ReferenceOTU25576	k__Bacteria; p__Firmicutes; c__Clostridia; o__Clostridiales; f__; g__; s__	6.1115e-05	-0.0951234	0.023589	7.28e-47	-0.0727923	0.005	0.19103	-0.08724	0.06667	0.173205	-0.163785	0.119336	1.16106e-48	-0.0730315	0.00498165	0	0.626046	0.731233	1	5.03e-52	-0.0739747	0.00487415	0	1.4657	0.69021	1	1	0	0	1
181702	k__Bacteria; p__Firmicutes; c__Clostridia; o__Clostridiales; f__; g__; s__	3.61193e-05	-0.0967062	0.023295	4.25e-43	0.143016	0.01	0.9044	-0.01651	0.13738	0.534555	0.0850914	0.13688	3.74069e-46	0.141874	0.00994724	0	1.51429	0.469004	0	0.694687	0.0278581	0.0709755	93.9704	90.2299	1.95512e-19	0	0	0	0	0
178117	k__Bacteria; p__Firmicutes; c__Clostridia; o__Clostridiales; f__Ruminococcaceae; g__Ruminococcus; s__	0.0316333	-0.0500269	0.0232068	1.13e-39	-0.0397336	0.003	0.95814	-0.02725	0.51914	0.93595	-0.0100949	0.125108	4.969e-40	-0.0397162	0.00299909	0	0.0566679	0.972064	1	5.3e-41	-0.0398856	0.00297435	0	0.250825	0.968995	1	1	0	0	1
300618	k__Bacteria; p__Firmicutes; c__Clostridia; o__Clostridiales; f__; g__; s__	6.90617e-05	-0.0928509	0.0232272	6.92e-15	-0.0802023	0.01	0.0404	-0.05394	0.02628	0.151787	-0.189395	0.131901	9.83456e-17	-0.0774428	0.00932285	0	1.59636	0.450148	1	3.65e-20	-0.0795806	0.00865194	0	1.97535	0.577538	1	1	1	0	1
4469576	k__Bacteria; p__Firmicutes; c__Clostridia; o__Clostridiales; f__Lachnospiraceae; g__; s__	0.00257638	0.0729381	0.0241047	2.01e-47	0.133031	0.009	0.0047	0.08281	0.02922	0.210971	0.15336	0.121254	5.54488e-08	0.117822	0.0216868	41.9383	2.7393	0.254196	1	3.09e-07	0.104074	0.0203365	59.0201	7.50664	0.0573881	1	1	1	0	1
313524	k__Bacteria; p__Firmicutes; c__Clostridia; o__Clostridiales; f__Ruminococcaceae; g__; s__	4.26384e-06	-0.110756	0.0239586	2.89e-06	-0.254787	0.055	0.01792	-0.24302	0.10248	0.327558	-0.120017	0.122376	2.00615e-07	-0.234243	0.0450574	0	1.01809	0.60107	1	0.000205288	-0.174	0.0468698	54.583	6.87367	0.0760353	0	1	1	0	1
4433737	k__Bacteria; p__Firmicutes; c__Clostridia; o__Clostridiales; f__Lachnospiraceae; g__; s__	1.12134e-05	0.101252	0.0229401	4.31e-06	0.0474611	0.01	0.27652	0.03286	0.03018	0.0916356	0.223999	0.130658	7.3723e-07	0.04695	0.00948239	0.036094	2.05674	0.357589	1	0.000871966	0.0638073	0.0191678	54.2707	6.84424	0.0770317	0	1	0	0	1
4377149	k__Bacteria; p__Firmicutes; c__Clostridia; o__Clostridiales; f__; g__; s__	0.0015178	-0.0753041	0.0235701	3.08e-06	-0.0802471	0.017	0.00141	-0.05299	0.01654	0.824388	-0.030052	0.134576	7.97349e-07	-0.0659711	0.0133653	12.6572	1.3924	0.498475	1	1.32e-10	-0.0678398	0.0105581	0	1.51787	0.678153	1	1	1	0	1
New.0.CleanUp.ReferenceOTU32262	k__Bacteria; p__Firmicutes; c__Clostridia; o__Clostridiales; f__Lachnospiraceae; g__Blautia; s__	0.00176971	0.0720185	0.0229583	1.41e-05	-0.0175611	0.004	NA	NA	NA	0.462476	-0.086824	0.117739	1.02054e-05	-0.0176409	0.00399769	0	0.345666	0.556577	0	0.73179	0.0136788	0.0399094	86.1676	15.1483	0.000513557	0	0	0	0	0
New.0.CleanUp.ReferenceOTU33470	k__Bacteria; p__Firmicutes; c__Clostridia; o__Clostridiales; f__Ruminococcaceae; g__Ruminococcus; s__	5.16207e-05	-0.0945711	0.0231518	7.45e-06	0.0307591	0.007	0.55986	-0.17159	0.29419	0.709523	-0.045441	0.121955	1.35828e-05	0.0303949	0.00698653	0	0.860778	0.650256	0	0.475835	-0.0347775	0.0487751	86.2411	27.5639	4.48401e-06	0	0	0	0	0
537219	k__Bacteria; p__Firmicutes; c__Clostridia; o__Clostridiales; f__; g__; s__	0.00395814	-0.0691917	0.0238796	0.0341455	-0.233582	0.111	0.06922	-0.08511	0.04679	0.958129	-0.00651087	0.122334	0.0178809	-0.0963633	0.0406927	0.0465012	2.12552	0.345501	0	0.000222811	-0.0761808	0.020636	0.0989529	2.45723	0.48307	1	1	0	0	1
44151	k__Bacteria; p__Firmicutes; c__Clostridia; o__Clostridiales; f__Ruminococcaceae; g__; s__	0.00156528	-0.0743421	0.0234321	0.584882	-0.0478552	0.088	0.0368	-0.14446	0.06909	0.210379	-0.131827	0.104445	0.0193148	-0.112777	0.0482078	0	0.787829	0.674412	0	0.000106131	-0.0816873	0.0210745	0	1.30201	0.728656	1	0	1	0	1
287790	k__Bacteria; p__Firmicutes; c__Clostridia; o__Clostridiales; f__Ruminococcaceae; g__; s__	0.000127974	-0.093066	0.0241423	2e-23	-0.15339	0.015	0.00422	-0.06071	0.02116	0.903469	0.0147495	0.119886	0.0246093	-0.0959288	0.0426828	85.1327	14.0629	0.000883636	0	0.000339739	-0.0987167	0.0275518	77.398	15.1287	0.00170993	0	1	1	0	1
4402903	k__Bacteria; p__Firmicutes; c__Clostridia; o__Clostridiales; f__Christensenellaceae; g__; s__	0.00262597	-0.0715608	0.023643	0.647633	64.3233	141.538	0.02864	-0.06661	0.03039	0.953995	0.00690118	0.118667	0.0349624	-0.0620827	0.0294399	0	0.567063	0.753119	0	0.000232902	-0.0678446	0.0184342	0	0.630074	0.889514	1	0	1	0	1
193129	k__Bacteria; p__Firmicutes; c__Clostridia; o__Clostridiales; f__Lachnospiraceae; g__; s__	0.00138244	-0.0767715	0.0239543	0.958911	-0.0911761	1.78	0.03369	-0.04623	0.02174	0.909586	-0.00898664	0.0789191	0.0374494	-0.0436097	0.0209578	0	0.207713	0.901355	0	0.00023657	-0.0579879	0.0157731	0	1.29325	0.730735	1	0	1	0	1
584107	k__Bacteria; p__Firmicutes; c__Clostridia; o__Clostridiales; f__; g__; s__	0.000586181	-0.0845767	0.0245006	7.54e-29	-0.664024	0.06	9.98e-05	-0.1335	0.03416	0.089941	-0.206097	0.121184	0.0477139	-0.337601	0.170513	95.5086	59.2543	1.35857e-13	0	0.0463409	-0.271006	0.136029	97.3962	80.7804	2.08751e-17	0	1	1	0	1
4321810	k__Bacteria; p__Firmicutes; c__Clostridia; o__Clostridiales; f__Lachnospiraceae; g__Blautia; s__	0.0010709	0.0771687	0.0235394	0.0168322	-0.0514407	0.021	0.69071	-0.01224	0.03075	0.474692	0.116707	0.163173	0.0616975	-0.035754	0.0191355	8.68883	2.00838	0.366342	0	0.796844	0.00957517	0.0371946	80.4487	17.3792	0.00059051	0	0	0	0	0
183698	k__Bacteria; p__Firmicutes; c__Clostridia; o__Clostridiales; f__Lachnospiraceae; g__; s__	0.00167652	0.0749437	0.0237764	5.19e-13	0.0206558	0.003	0.01298	0.05999	0.0241	0.0412613	0.374865	0.182999	0.0643787	0.0390664	0.0211222	54.4134	6.35598	0.0416694	0	0.00972067	0.0495031	0.0191456	64.6531	11.3585	0.00993734	0	1	1	1	1
300374	k__Bacteria; p__Firmicutes; c__Clostridia; o__Clostridiales; f__Ruminococcaceae; g__Oscillospira; s__	0.0150135	-0.0590986	0.0241403	0.587703	0.765675	1.42	0.05915	-0.1233	0.06525	0.937016	-0.0105538	0.13336	0.0875535	-0.100048	0.0585607	0	0.949015	0.622192	0	0.00356277	-0.0650464	0.0223183	0	1.36696	0.713297	1	0	0	0	0
New.0.CleanUp.ReferenceOTU20932	k__Bacteria; p__Firmicutes; c__Clostridia; o__Clostridiales; f__Ruminococcaceae; g__; s__	0.000567423	-0.079444	0.0229923	0.00457299	-0.773127	0.273	0.23743	-0.19102	0.16158	0.318313	-0.112396	0.112453	0.0879649	-0.28515	0.167123	65.0186	5.01598	0.0814319	0	0.0314071	-0.132566	0.0616051	31.5638	6.88964	0.0754997	0	1	0	0	1
538322	k__Bacteria; p__Firmicutes; c__Clostridia; o__Clostridiales; f__Ruminococcaceae; g__Oscillospira; s__	0.000496876	-0.083484	0.0238178	0.0791985	0.0459011	0.026	0.26753	0.09123	0.08223	0.178068	-0.164832	0.121258	0.088924	0.0413858	0.0243289	0.0501517	3.28979	0.193033	0	0.751486	-0.0155919	0.0492355	80.1491	16.7675	0.000788973	0	0	0	0	0
189820	k__Bacteria; p__Firmicutes; c__Clostridia; o__Clostridiales; f__Ruminococcaceae; g__Ruminococcus; s__	0.00354482	-0.0695219	0.0237171	3.51e-22	0.649115	0.067	0.55238	0.06024	0.10135	0.21271	0.151327	0.121053	0.115837	0.295552	0.187951	91.5245	29.2063	4.54922e-07	0	0.222456	0.198019	0.162307	95.6844	103.733	2.44779e-22	0	0	0	0	0
310979	k__Bacteria; p__Firmicutes; c__Clostridia; o__Clostridiales; f__; g__; s__	0.00206663	-0.0729168	0.0235812	7.89e-18	-0.584631	0.068	0.42591	-0.06068	0.07617	0.570658	-0.294169	0.518587	0.127485	-0.320544	0.210318	90.4057	26.3436	1.90355e-06	0	0.119414	-0.241268	0.154933	94.3583	51.3755	4.06899e-11	0	1	0	0	1
179325	k__Bacteria; p__Firmicutes; c__Clostridia; o__Clostridiales; f__Ruminococcaceae; g__; s__	0.00731151	-0.0621827	0.0231226	0.460631	-261.022	355.677	0.01846	-0.34683	0.14693	0.623144	-0.0632408	0.127159	0.166962	-0.195523	0.141475	36.1031	2.66777	0.263452	0	0.111099	-0.109512	0.0687337	32.489	4.20274	0.240388	0	0	1	0	1
190864	k__Bacteria; p__Firmicutes; c__Clostridia; o__Clostridiales; f__; g__; s__	0.00318083	0.0688733	0.0230985	0.633204	0.0155561	0.033	0.04893	0.0931	0.04721	0.890313	0.0186408	0.132753	0.187649	0.0438295	0.0332655	22.125	1.83963	0.398593	0	0.00345747	0.0558769	0.0191108	8.89417	2.5087	0.473721	0	0	1	0	1
4465124	k__Bacteria; p__Firmicutes; c__Clostridia; o__Clostridiales; f__Clostridiaceae; g__Clostridium; s__	6.72955e-06	-0.106478	0.0235264	0.730951	-0.00250129	0.007	3.44e-06	-0.08934	0.01913	0.379151	-0.116976	0.131682	0.205007	-0.0492234	0.0388377	88.272	18.7977	8.28187e-05	0	0.0361091	-0.0656708	0.031336	88.0394	33.4397	2.6013e-07	0	0	1	0	1
199286	k__Bacteria; p__Firmicutes; c__Clostridia; o__Clostridiales; f__; g__; s__	3.79019e-06	-0.108713	0.0233852	0.242938	0.00752754	0.006	0.09132	-0.07308	0.04324	0.0364545	-0.25016	0.119013	0.271937	-0.0614413	0.0559262	79.4966	8.0309	0.0180348	0	0.0748606	-0.0712303	0.0399874	87.3057	30.3886	1.14325e-06	0	0	0	1	1
3014082	k__Bacteria; p__Firmicutes; c__Clostridia; o__Clostridiales; f__Lachnospiraceae	0.00147103	0.075449	0.023653	0.677225	0.0110008	0.026	0.40455	0.03641	0.04366	0.110987	0.224423	0.139274	0.300646	0.022868	0.0220936	0.118271	2.39887	0.301365	0	0.0356859	0.0476194	0.0226706	35.8192	5.04503	0.168529	0	0	0	0	0
289734	k__Bacteria; p__Firmicutes; c__Clostridia; o__Clostridiales; f__Lachnospiraceae; g__; s__	0.00524365	0.0678784	0.0242399	0.00039632	0.549673	0.155	0.07579	0.06096	0.03429	0.747498	-0.0324392	0.100629	0.305226	0.169867	0.165677	89.9243	10.6781	0.00480054	0	0.209929	0.128328	0.102354	93.9637	10.6896	0.0135281	0	1	0	0	1
4421273	k__Bacteria; p__Firmicutes; c__Clostridia; o__Clostridiales; f__Ruminococcaceae; g__Oscillospira; s__	0.0110553	-0.0616478	0.0241206	6.93e-60	9.50864	0.584	0.30727	-0.04867	0.04765	0.105868	0.189095	0.115868	0.308488	3.19273	3.13504	99.9486	267.993	6.39673e-59	0	0.313892	2.3701	2.35342	99.9836	272.076	1.09707e-58	0	0	0	0	0
180136	k__Bacteria; p__Firmicutes; c__Clostridia; o__Clostridiales; f__Ruminococcaceae; g__Oscillospira; s__	0.00632719	-0.066304	0.0241547	1.76e-76	0.622991	0.034	0.01741	-0.07001	0.02939	0.491943	0.0923846	0.134328	0.309417	0.219629	0.216076	98.6246	238.743	1.43753e-52	0	0.387801	0.146122	0.169199	98.9041	317.241	1.84468e-68	0	0	1	0	1
189924	k__Bacteria; p__Firmicutes; c__Clostridia; o__Clostridiales; f__Ruminococcaceae; g__; s__	0.000135836	-0.0889742	0.0231464	1.39e-21	-0.0295514	0.003	0.57339	0.02936	0.05212	0.696217	0.0471615	0.120195	0.31613	-0.0200672	0.0200183	16.8231	1.6784	0.432056	0	0.166101	-0.036598	0.0264276	69.7889	8.21367	0.0417962	0	1	0	0	1
322835	k__Bacteria; p__Firmicutes; c__Clostridia; o__Clostridiales; f__Lachnospiraceae; g__Lachnospira; s__	7.59811e-05	-0.0935307	0.0234793	3.27e-67	3.85714	0.223	0.66974	0.01949	0.04569	0.381771	-0.100606	0.113928	0.334228	1.25148	1.29602	99.7618	289.261	1.54083e-63	0	0.348796	0.912076	0.973476	99.9132	312.574	1.8886e-67	0	0	0	0	0
345301	k__Bacteria; p__Firmicutes; c__Clostridia; o__Clostridiales; f__; g__; s__	2.5073e-05	-0.100877	0.0238331	1.16e-13	20.2717	2.71	0.00318	-0.1774	0.05998	0.25116	-0.141003	0.119887	0.337839	6.40731	6.68512	99.9864	56.9499	4.30017e-13	0	0.340382	4.68305	4.91188	99.9947	58.0384	1.54245e-12	0	0	1	0	1
195494	k__Bacteria; p__Firmicutes; c__Clostridia; o__Clostridiales; f__Ruminococcaceae; g__; s__	0.0862042	-0.0407784	0.02375	2.61e-65	0.246728	0.014	0.16326	0.09868	0.07073	0.292886	-0.134084	0.126191	0.338487	0.0993366	0.103783	86.9732	12.9543	0.00153821	0	0.460865	0.0610451	0.0827816	95.9225	115.589	6.8737e-25	0	0	0	0	0
299407	k__Bacteria; p__Firmicutes; c__Clostridia; o__Clostridiales; f__Ruminococcaceae; g__; s__	0.0313217	-0.0532107	0.0246648	1.23e-114	3.6156	0.158	0.07581	-0.1192	0.06706	0.93594	0.00960558	0.118245	0.340349	1.16577	1.22265	99.7308	484.409	6.4867e-106	0	0.347816	0.859343	0.915331	99.8462	530.974	9.2422e-115	0	0	0	0	0
192385	k__Bacteria; p__Firmicutes; c__Clostridia; o__Clostridiales; f__Christensenellaceae; g__; s__	0.00260374	-0.0721416	0.023895	0.00618588	3.42504	1.258	0.87702	0.01584	0.10231	0.137465	0.182362	0.12148	0.343754	0.805251	0.85052	98.652	8.12162	0.0172351	0	0.771191	0.0223258	0.0767692	53.4968	12.4515	0.00598625	0	0	0	0	0
323903	k__Bacteria; p__Firmicutes; c__Clostridia; o__Clostridiales; f__Ruminococcaceae; g__; s__	1.75675e-05	-0.10229	0.0236915	0.509639	-0.00518942	0.008	0.09658	-0.08112	0.04877	0.454674	-0.119755	0.159374	0.349003	-0.0316246	0.033768	42.1803	2.85818	0.239526	0	0.0713137	-0.0590862	0.0327624	77.5933	17.2838	0.00061783	0	0	0	0	0
3856408	k__Bacteria; p__Firmicutes; c__Clostridia; o__Clostridiales; f__Lachnospiraceae; g__; s__	0.000379706	-0.0845287	0.0237222	1.71e-19	2.46389	0.274	0.86658	-0.06982	0.4155	0.696617	-0.0522786	0.132314	0.352158	0.785334	0.844071	96.9179	69.6858	7.37773e-16	0	0.374685	0.55979	0.630585	98.685	85.8713	1.68704e-18	0	0	0	0	0
198248	k__Bacteria; p__Firmicutes; c__Clostridia; o__Clostridiales; f__Ruminococcaceae; g__; s__	0.0015405	-0.0756477	0.0237922	1.46e-26	0.231126	0.022	0.57966	0.03108	0.05609	0.499968	-0.082366	0.1213	0.354599	0.0846406	0.0914336	87.1118	16.4602	0.000266512	0	0.624084	0.0384119	0.0783805	94.4566	92.5104	6.3283e-20	0	0	0	0	0
180585	k__Bacteria; p__Firmicutes; c__Clostridia; o__Clostridiales; f__; g__; s__	0.000470677	-0.084648	0.0240715	0.000304783	4.97586	1.386	0.15991	-0.08817	0.06269	0.392371	0.113435	0.132182	0.354705	1.38449	1.49593	99.6578	15.0322	0.000544248	0	0.37617	0.863543	0.975781	99.8408	15.4959	0.00143835	0	0	0	0	0
216710	k__Bacteria; p__Firmicutes; c__Clostridia; o__Clostridiales; f__Ruminococcaceae; g__; s__	0.00380683	-0.0679233	0.0233846	1.73e-11	0.0643211	0.01	0.61046	-0.05959	0.11693	0.646821	-0.0588856	0.127832	0.360667	0.0385445	0.0421669	22.2087	2.02471	0.363362	0	0.794492	-0.012182	0.0467672	85.3765	28.4502	2.92171e-06	0	0	0	0	0
321453	k__Bacteria; p__Firmicutes; c__Clostridia; o__Clostridiales; f__Lachnospiraceae; g__Blautia; s__	0.00336456	0.0683258	0.0232614	6.36e-12	0.0267407	0.004	NA	NA	NA	0.0478208	0.371624	0.186149	0.36652	0.148969	0.164969	70.8539	3.431	0.0639835	0	0.0342455	0.0469715	0.022186	58.8539	6.5115	0.0385518	0	1	0	1	1
4450214	k__Bacteria; p__Firmicutes; c__Clostridia; o__Clostridiales; f__Ruminococcaceae; g__; s__	0.000422142	-0.08608	0.024261	4.38e-06	1.31195	0.286	0.07893	-0.03954	0.02248	0.708402	-0.0476164	0.125259	0.390907	0.370341	0.431646	97.491	22.2097	1.50391e-05	0	0.442007	0.238527	0.310255	99.576	24.9549	1.57793e-05	0	0	0	0	0
338105	k__Bacteria; p__Firmicutes; c__Clostridia; o__Clostridiales; f__Christensenellaceae; g__; s__	0.000931221	-0.0794546	0.0238891	4.13e-28	1.77231	0.162	0.01439	-0.23214	0.09467	0.567405	0.0712925	0.123264	0.392184	0.531865	0.621583	98.68	116.077	6.2252e-26	0	0.416974	0.375482	0.462598	99.1144	132.711	1.409e-28	0	0	1	0	1
196905	k__Bacteria; p__Firmicutes; c__Clostridia; o__Clostridiales; f__Ruminococcaceae; g__; s__	5.94584e-05	-0.0920655	0.0227533	9.81e-48	2.16063	0.149	0.06925	-0.21107	0.11604	0.956194	-0.00647893	0.117042	0.394391	0.645168	0.757522	99.073	179.323	1.1493e-39	0	0.416795	0.458471	0.564623	99.3465	225.56	1.26123e-48	0	0	0	0	0
182196	k__Bacteria; p__Firmicutes; c__Clostridia; o__Clostridiales; f__; g__; s__	4.29912e-05	0.0936905	0.022787	0.614322	0.00397554	0.008	0.1707	0.07298	0.05324	0.337055	0.13269	0.135042	0.394644	0.0260358	0.0305862	32.9261	2.52685	0.282684	0	0.0813412	0.0543815	0.0312007	75.9479	15.7678	0.00126531	0	0	0	0	0
197890	k__Bacteria; p__Firmicutes; c__Clostridia; o__Clostridiales; f__Ruminococcaceae; g__Oscillospira; s__	2.21239e-06	-0.112158	0.0234647	1.7e-11	0.174746	0.026	0.26249	-0.03369	0.03004	0.838725	0.024951	0.122039	0.405615	0.0621338	0.0747128	89.9812	27.7648	9.3532e-07	0	0.86356	0.0118915	0.0691993	94.1491	69.2365	6.21926e-15	0	0	0	0	0
555547	k__Bacteria; p__Firmicutes; c__Clostridia; o__Clostridiales; f__Christensenellaceae; g__; s__	0.00102977	-0.0765674	0.0232609	7.12e-15	0.516056	0.066	0.32189	-0.06842	0.06904	0.970966	0.00455356	0.124712	0.407428	0.155988	0.188294	93.7209	40.4769	1.6239e-09	0	0.513531	0.0947254	0.144984	95.7096	72.3706	1.32594e-15	0	0	0	0	0
4398588	k__Bacteria; p__Firmicutes; c__Clostridia; o__Clostridiales; f__Ruminococcaceae; g__; s__	1.32361e-05	-0.102035	0.0232757	5e-24	1.25751	0.125	0.21775	-0.10195	0.08266	0.670155	-0.0488002	0.114541	0.408965	0.365987	0.443236	98.0839	89.5639	3.55998e-20	0	0.459344	0.246004	0.33247	98.6856	114.621	1.11071e-24	0	0	0	0	0
182797	k__Bacteria; p__Firmicutes; c__Clostridia; o__Clostridiales; f__Ruminococcaceae; g__; s__	8.02664e-05	-0.0927325	0.0234387	7.41e-31	1.41166	0.122	0.132	-0.10824	0.07171	0.564156	-0.0698996	0.119175	0.412954	0.408763	0.499279	98.5883	122.224	2.88004e-27	0	0.451156	0.28093	0.372839	99.0811	147.523	9.01656e-32	0	0	0	0	0
190100	k__Bacteria; p__Firmicutes; c__Clostridia; o__Clostridiales; f__Lachnospiraceae; g__Blautia; s__	0.0122769	0.0587475	0.0234103	2.18e-18	-2.46472	0.282	0.31131	0.04805	0.04743	0.048517	0.247843	0.123203	0.414241	-0.704949	0.863428	99.34	81.3776	2.13342e-18	0	0.423693	-0.506052	0.63254	99.7749	82.2358	1.01716e-17	0	0	0	1	1
4370941	k__Bacteria; p__Firmicutes; c__Clostridia; o__Clostridiales; f__Ruminococcaceae; g__; s__	0.00310513	-0.0710991	0.0239992	2.32e-94	1.76187	0.085	0.00112	-0.13198	0.04036	0.243938	-0.132823	0.113271	0.42935	0.499016	0.631423	99.5161	413.708	1.45996e-90	0	0.447301	0.355671	0.468035	99.7218	450.162	3.00779e-97	0	0	1	0	1
300870	k__Bacteria; p__Firmicutes; c__Clostridia; o__Clostridiales; f__Ruminococcaceae; g__; s__	8.63345e-06	-0.105796	0.0236765	3.22e-108	1.29836	0.058	0.35567	-0.05266	0.05698	0.239585	-0.146421	0.123652	0.429675	0.369488	0.467856	99.2187	309.957	4.93982e-68	0	0.476463	0.250191	0.351391	99.4353	511.364	1.6438e-110	0	0	0	0	0
197540	k__Bacteria; p__Firmicutes; c__Clostridia; o__Clostridiales; f__Ruminococcaceae; g__; s__	0.00102361	-0.0786907	0.0238971	5.18e-26	1.44902	0.138	0.28438	-0.1305	0.12183	0.359422	-0.114079	0.124286	0.444551	0.399822	0.522964	98.0082	92.802	7.05166e-21	0	0.472896	0.277328	0.386372	98.5376	119.953	7.89926e-26	0	0	0	0	0
199421	k__Bacteria; p__Firmicutes; c__Clostridia; o__Clostridiales; f__Lachnospiraceae; g__Lachnospira; s__	0.00127941	-0.0758216	0.0234812	1.66e-05	3.37015	0.787	0.15483	-0.15858	0.11137	0.0376966	-0.263982	0.126385	0.444772	0.863764	1.13034	99.2512	20.7941	3.05218e-05	0	0.463763	0.57209	0.780835	99.526	21.8561	6.98847e-05	0	0	0	1	1
New.0.CleanUp.ReferenceOTU43313	k__Bacteria; p__Firmicutes; c__Clostridia; o__Clostridiales; f__Ruminococcaceae; g__; s__	0.000932611	-0.08073	0.0243275	6.58e-15	1.52542	0.197	0.1614	-0.23547	0.16801	0.796997	-0.0365263	0.141075	0.456474	0.412212	0.553553	96.9567	54.3751	1.55812e-12	0	0.484738	0.28334	0.405523	97.8393	66.6112	2.26807e-14	0	0	0	0	0
177153	k__Bacteria; p__Firmicutes; c__Clostridia; o__Clostridiales; f__; g__; s__	0.00139673	-0.0763002	0.0237747	2.66e-65	0.4753	0.028	0.002	-0.07003	0.0226	0.813919	-0.0312206	0.130261	0.464882	0.132511	0.181315	98.7015	231.482	5.42275e-51	0	0.569221	0.079136	0.13903	98.7961	286.291	9.21503e-62	0	0	1	0	1
581201	k__Bacteria; p__Firmicutes; c__Clostridia; o__Clostridiales; f__Ruminococcaceae; g__; s__	2.05605e-05	-0.103228	0.0241394	1.89e-09	0.94124	0.158	0.13595	-0.09919	0.06646	0.469055	-0.0884379	0.12141	0.478287	0.241045	0.339949	96.4254	37.9907	5.62882e-09	0	0.552576	0.148608	0.250222	97.9085	42.7842	2.73475e-09	0	0	0	0	0
4478840	k__Bacteria; p__Firmicutes; c__Clostridia; o__Clostridiales; f__Clostridiaceae; g__; s__	0.000131351	-0.0922548	0.0239857	1e-15	0.44354	0.056	0.7093	0.01773	0.04755	0.275904	-0.126286	0.115592	0.481788	0.120155	0.170812	95.0777	40.6782	1.46838e-09	0	0.620493	0.0652414	0.13176	96.5243	78.6944	5.84859e-17	0	0	0	0	0
190490	k__Bacteria; p__Firmicutes; c__Clostridia; o__Clostridiales; f__Ruminococcaceae; g__; s__	0.000477339	-0.0803001	0.0228469	2.45e-18	0.213989	0.025	0.04812	0.09773	0.04938	0.15281	-0.177339	0.122868	0.482839	0.0727467	0.103666	91.2082	13.078	0.00144597	0	0.711089	0.0312231	0.0842969	95.1745	79.837	3.32652e-17	0	0	0	0	0
197402	k__Bacteria; p__Firmicutes; c__Clostridia; o__Clostridiales; f__Lachnospiraceae; g__Blautia; s__	0.000611716	0.0792033	0.0228716	5.71e-06	-0.0177724	0.004	0.86679	0.005613	0.033454	0.0192639	0.402917	0.171413	0.495818	0.0579452	0.0850779	93.8298	6.49242	0.0389214	0	0.311645	0.0352245	0.0348145	85.6986	23.7449	2.82389e-05	0	0	0	1	1
New.0.CleanUp.ReferenceOTU6169	k__Bacteria; p__Firmicutes; c__Clostridia; o__Clostridiales; f__Ruminococcaceae; g__Oscillospira; s__	0.0177097	-0.0565114	0.0237434	NA	NA	NA	0.65077	0.04847	0.10703	0.602097	0.0729368	0.139468	0.497994	0.0575385	0.084909	0	0.0193686	0.889315	0	0.313237	-0.0368601	0.0365511	12.0888	1.69271	0.428975	0	0	0	0	0
New.0.CleanUp.ReferenceOTU15088	k__Bacteria; p__Firmicutes; c__Clostridia; o__Clostridiales; f__Ruminococcaceae; g__; s__	0.00526573	-0.0663308	0.0236997	9.87e-127	0.724984	0.03	0.000664	-0.09197	0.02693	0.359036	-0.112329	0.122239	0.519787	0.179131	0.278295	99.3413	420.315	5.36722e-92	0	0.567731	0.117901	0.206339	99.3778	533.808	2.2463e-115	0	0	1	0	1
147100	k__Bacteria; p__Firmicutes; c__Clostridia; o__Clostridiales; f__Ruminococcaceae; g__; s__	3.92487e-05	-0.0996257	0.0241275	2.93e-74	0.622035	0.034	0.13013	-0.09433	0.06227	0.446711	-0.0940918	0.123229	0.530663	0.152044	0.242496	97.6983	120.879	5.6428e-27	0	0.6282	0.0886659	0.183095	98.5773	315.699	3.97853e-68	0	0	0	0	0
187917	k__Bacteria; p__Firmicutes; c__Clostridia; o__Clostridiales; f__Ruminococcaceae; g__; s__	0.000687894	-0.0815686	0.0238638	1.51e-54	0.0887142	0.006	0.02656	-0.12408	0.05585	0.0957943	-0.2085	0.124564	0.536664	-0.056254	0.0910456	88.4539	19.939	4.68068e-05	0	0.362648	-0.0567412	0.0623303	94.3354	66.1368	2.86524e-14	0	0	1	0	1
New.0.CleanUp.ReferenceOTU5899	k__Bacteria; p__Firmicutes; c__Clostridia; o__Clostridiales; f__Christensenellaceae; g__; s__	0.000568634	-0.080145	0.0231263	0.753971	0.261803	0.84	0.61557	0.09819	0.19549	0.0873839	-0.203228	0.118387	0.547819	-0.0843888	0.140407	26.4623	1.94557	0.37803	0	0.000274903	-0.0819893	0.0225377	0	2.07212	0.557573	1	0	0	0	0
New.0.CleanUp.ReferenceOTU26796	k__Bacteria; p__Firmicutes; c__Clostridia; o__Clostridiales; f__Lachnospiraceae; g__Lachnospira; s__	6.25942e-05	-0.0947311	0.0235718	1e-61	0.0666916	0.004	0.09982	-0.14308	0.08685	0.20224	-0.150804	0.117795	0.555741	-0.0478808	0.081267	74.4364	9.21279	0.00998775	0	0.324885	-0.0566752	0.0575694	92.6207	54.4103	9.17302e-12	0	0	0	0	0
4375889	k__Bacteria; p__Firmicutes; c__Clostridia; o__Clostridiales; f__Ruminococcaceae; g__; s__	0.00116432	-0.0787545	0.024132	0.019291	-405.819	174.419	0.44508	-0.04045	0.05295	0.785339	0.0318036	0.116086	0.560842	-0.0280296	0.0481947	0.0162257	5.73343	0.0568856	0	0.00148859	-0.0685742	0.0215853	0.0136886	6.61943	0.0850697	0	1	0	0	1
194733	k__Bacteria; p__Firmicutes; c__Clostridia; o__Clostridiales; f__Lachnospiraceae; g__Blautia; s__	0.000334271	0.0841366	0.0233669	0.109965	-0.0308182	0.019	0.0144	0.07303	0.0298	0.4386	0.101044	0.130099	0.561785	0.0262249	0.0452004	76.8541	9.23789	0.0098632	0	0.211976	0.043741	0.0350447	80.2798	17.9489	0.000450649	0	0	1	0	1
2256425	k__Bacteria; p__Firmicutes; c__Clostridia; o__Clostridiales; f__Christensenellaceae; g__; s__	0.0052102	-0.0648572	0.0231426	2.34e-07	0.214583	0.042	0.80598	-0.04618	0.18797	0.479289	-0.0840471	0.118016	0.561992	0.0644976	0.111225	68.3365	7.08216	0.0289821	0	0.78468	0.0233431	0.0854355	87.7873	34.5065	1.5487e-07	0	0	0	0	0
372146	k__Bacteria; p__Firmicutes; c__Clostridia; o__Clostridiales; f__Ruminococcaceae; g__Oscillospira; s__	1.61328e-07	-0.122115	0.023175	0.00142875	0.335236	0.105	0.55842	0.14255	0.24351	0.125077	-0.182663	0.118789	0.579165	0.0959708	0.173044	77.2321	10.6889	0.00477456	0	0.843989	0.0255382	0.129771	85.1985	19.563	0.000209076	0	0	0	0	0
215468	k__Bacteria; p__Firmicutes; c__Clostridia; o__Clostridiales; f__Ruminococcaceae; g__; s__	0.000146866	-0.0914144	0.0240101	0.00616035	0.162172	0.059	0.19356	-0.09305	0.07152	0.579371	0.0720522	0.128821	0.580104	0.0474662	0.0857978	70.1121	7.587	0.0225166	0	0.972842	0.00234585	0.0689051	80.8214	17.1046	0.000672575	0	0	0	0	0
New.0.CleanUp.ReferenceOTU34809	k__Bacteria; p__Firmicutes; c__Clostridia; o__Clostridiales; f__Ruminococcaceae; g__; s__	0.000256765	-0.0877687	0.0239245	1.39e-18	0.12007	0.014	0.58653	-0.14507	0.26665	0.559371	-0.0841441	0.142547	0.594869	0.0463593	0.0871755	41.2391	3.00432	0.222649	0	0.899063	-0.00941706	0.0742403	92.5912	57.9605	1.6027e-12	0	0	0	0	0
182116	k__Bacteria; p__Firmicutes; c__Clostridia; o__Clostridiales; f__Lachnospiraceae; g__[Ruminococcus]; s__	0.0028923	0.0689033	0.0229515	0.109732	-0.0253336	0.016	0.0694	0.05628	0.03096	0.252384	0.18405	0.159948	0.598599	0.0212345	0.0403379	71.1332	6.91663	0.0314828	0	0.249751	0.0355145	0.0308566	76.1744	14.7608	0.00203287	0	0	0	0	0
316732	k__Bacteria; p__Firmicutes; c__Clostridia; o__Clostridiales; f__Lachnospiraceae; g__Lachnospira; s__	3.75645e-06	-0.107344	0.023081	3.74e-44	0.223909	0.016	0.44477	-0.01563	0.02045	0.379328	-0.134842	0.153042	0.603078	0.0536561	0.103189	97.5888	88.1477	7.22724e-20	0	0.915706	0.00901596	0.0851811	97.7754	170.527	9.79109e-37	0	0	0	0	0
232030	k__Bacteria; p__Firmicutes; c__Clostridia; o__Clostridiales; f__Lachnospiraceae; g__Coprococcus; s__	0.000984553	-0.0786886	0.0237531	4.51e-10	0.236234	0.038	0.0108	-0.10517	0.0412	0.877616	0.0185321	0.119426	0.626752	0.0535442	0.110105	92.0483	37.3485	7.76014e-09	0	0.83977	0.017072	0.0844367	93.8979	55.7348	4.78557e-12	0	0	1	0	1
194488	k__Bacteria; p__Firmicutes; c__Clostridia; o__Clostridiales; f__Ruminococcaceae; g__; s__	2.651e-06	-0.111604	0.0236561	5.11e-06	0.0353668	0.008	0.11103	-0.10432	0.0654	0.480887	-0.10289	0.144957	0.63946	-0.026965	0.0575616	62.1793	5.37489	0.0680544	0	0.239361	-0.0558453	0.0474639	88.3486	38.9203	1.80446e-08	0	0	0	0	0
297792	k__Bacteria; p__Firmicutes; c__Clostridia; o__Clostridiales; f__Ruminococcaceae; g__; s__	0.000115056	-0.0950883	0.0245622	1.19e-101	0.38498	0.018	0.09508	-0.13099	0.07839	0.648898	-0.0547802	0.117864	0.642916	0.0777472	0.167694	94.5282	53.2197	2.77642e-12	0	0.7897	0.0338976	0.1271	98.0389	272.426	9.21648e-59	0	0	0	0	0
389371	k__Bacteria; p__Firmicutes; c__Clostridia; o__Clostridiales; f__; g__; s__	3.77258e-05	-0.0960896	0.0231853	0.0964037	0.055176	0.033	0.03699	-0.08617	0.04125	0.445177	-0.0921121	0.120446	0.659262	-0.0248815	0.0564293	71.5209	7.71884	0.0210803	0	0.272318	-0.047493	0.0432644	78.0702	14.9491	0.00186069	0	0	1	0	1
176269	k__Bacteria; p__Firmicutes; c__Clostridia; o__Clostridiales; f__Lachnospiraceae; g__Lachnospira; s__	0.000449227	-0.0812718	0.0230916	2.02e-08	0.02768	0.005	0.40016	-0.01655	0.01966	0.856363	-0.0212114	0.117052	0.662453	0.00901422	0.0206498	63.9134	4.90942	0.0858879	0	0.493052	-0.0200816	0.0292965	87.1225	25.1648	1.42626e-05	0	0	0	0	0
3195723	k__Bacteria; p__Firmicutes; c__Clostridia; o__Clostridiales; f__Ruminococcaceae; g__Oscillospira; s__	9.69344e-07	-0.114852	0.0233209	1.82e-52	0.166686	0.011	0.03301	-0.08323	0.03898	0.958214	0.00678762	0.129149	0.664332	0.0377577	0.0870112	92.4832	39.2658	2.97537e-09	0	0.938523	-0.00563394	0.0730481	96.1837	144.163	4.78271e-31	0	0	1	0	1
4349261	k__Bacteria; p__Firmicutes; c__Clostridia; o__Clostridiales; f__Lachnospiraceae; g__; s__	1.45465e-05	-0.103702	0.0237912	7.75e-90	0.508094	0.025	9.09e-05	-0.10741	0.02732	0.229263	-0.152774	0.125702	0.674147	0.0908811	0.216145	99.0527	285.214	1.16582e-62	0	0.79133	0.0425165	0.160692	99.0646	401.455	1.07149e-86	0	0	1	0	1
540055	k__Bacteria; p__Firmicutes; c__Clostridia; o__Clostridiales; f__Ruminococcaceae; g__; s__	0.00110654	-0.0786335	0.0239625	2.96e-67	0.332831	0.019	0.01431	-0.08015	0.03266	0.346515	-0.11785	0.123531	0.702229	0.0567902	0.148544	97.8783	127.182	2.41372e-28	0	0.834016	0.0232118	0.110767	98.1033	235.157	1.06128e-50	0	0	1	0	1
New.0.CleanUp.ReferenceOTU6086	k__Bacteria; p__Firmicutes; c__Clostridia; o__Clostridiales; f__Ruminococcaceae; g__Oscillospira; s__	0.0369129	-0.0489749	0.0234423	0.0469412	1064.48	538.825	0.32415	-0.09017	0.0914	0.570308	0.0592653	0.103773	0.751607	-0.0235117	0.0742817	7.74193	5.07081	0.0792297	0	0.0366217	-0.0464449	0.0222229	0.0290408	5.18139	0.158987	1	0	0	0	0
178478	k__Bacteria; p__Bacteroidetes; c__Bacteroidia; o__Bacteroidales; f__Bacteroidaceae; g__Bacteroides; s__	2.41036e-05	-0.100153	0.0234913	9.32e-119	0.0849145	0.004	0.03417	-0.05877	0.0277	0.158767	-0.246928	0.17463	0.803551	-0.0184027	0.0739793	94.0953	29.9027	3.21159e-07	0	0.475675	-0.039949	0.0560078	95.1848	88.2472	5.21192e-19	0	0	1	0	1
New.0.CleanUp.ReferenceOTU20603	k__Bacteria; p__Bacteroidetes; c__Bacteroidia; o__Bacteroidales; f__Rikenellaceae; g__; s__	1.03998e-05	-0.10185	0.0228204	2.48e-14	0.430966	0.057	0.69839	-0.02362	0.06094	0.0136787	-0.286862	0.115799	0.816214	0.0485108	0.208723	95.9957	46.5684	7.72322e-11	0	0.939609	0.011429	0.150856	96.8475	80.1748	2.81535e-17	0	0	0	1	1
300620	k__Bacteria; p__Firmicutes; c__Clostridia; o__Clostridiales; f__Ruminococcaceae; g__; s__	0.00426862	-0.0664528	0.0231352	1.48e-31	0.154568	0.013	0.00434	-0.07735	0.02705	0.109255	-0.220375	0.135594	0.836619	-0.0217615	0.105525	97.0759	65.6456	5.56198e-15	0	0.702359	-0.0277854	0.0727104	96.6719	111.278	5.82627e-24	0	0	1	0	1
2835813	k__Bacteria; p__Firmicutes; c__Clostridia; o__Clostridiales; f__Ruminococcaceae; g__; s__	6.68631e-06	-0.105001	0.0232218	2.23e-36	0.364951	0.029	0.28002	-0.07996	0.07398	0.0620669	-0.23137	0.123331	0.862853	0.031365	0.18157	95.1676	49.4456	1.83239e-11	0	0.991479	-0.00141618	0.132606	97.5193	170.182	1.16241e-36	0	0	0	0	0
4468466	k__Bacteria; p__Firmicutes; c__Clostridia; o__Clostridiales; f__Ruminococcaceae; g__; s__	0.00250436	-0.0730294	0.024089	8.29e-51	0.0791204	0.005	0.000352	-0.07704	0.02148	0.523761	-0.0871455	0.13654	0.873345	-0.0100518	0.0630557	95.0154	51.4782	6.63197e-12	0	0.5663	-0.0269731	0.0470317	94.4352	85.7744	1.76982e-18	0	0	1	0	1
3422630	k__Bacteria; p__Firmicutes; c__Clostridia; o__Clostridiales; f__Ruminococcaceae; g__; s__	0.00253658	-0.0707129	0.0233376	7.08e-05	0.112479	0.028	0.1267	-0.16372	0.1071	0.936211	0.00956116	0.119192	0.909858	0.00967308	0.0854375	68.0808	6.71159	0.0348817	0	0.827312	-0.0136499	0.0625713	86.4399	27.6613	4.27781e-06	0	0	0	0	0
184940	k__Bacteria; p__Firmicutes; c__Clostridia; o__Clostridiales; f__Christensenellaceae; g__; s__	0.0183783	-0.0565475	0.0239059	1.35e-46	0.300943	0.021	0.9641	0.004466	0.099214	0.0701529	-0.36773	0.202452	0.910309	0.0207282	0.184008	91.2974	18.9378	7.72151e-05	0	0.926665	0.0115073	0.125022	97.4452	134.482	5.84956e-29	0	0	0	0	0
178845	k__Bacteria; p__Firmicutes; c__Clostridia; o__Clostridiales; f__Ruminococcaceae; g__; s__	2.93422e-05	-0.103782	0.0247175	7.13e-22	0.192518	0.02	0.00318	-0.06588	0.02227	0.230646	-0.149519	0.122869	0.919577	0.0105003	0.103997	97.0621	77.8778	1.22757e-17	0	0.815445	-0.0185158	0.0793282	96.8322	115.944	5.76554e-25	0	0	1	0	1
352014	k__Bacteria; p__Firmicutes; c__Clostridia; o__Clostridiales; f__Ruminococcaceae; g__Oscillospira; s__	2.99759e-06	-0.114958	0.024429	3.19e-10	0.231006	0.037	0.00278	-0.13084	0.04363	0.445488	-0.0916241	0.118973	0.923486	0.0116917	0.121733	93.3411	41.9708	7.69396e-10	0	0.813483	-0.0216728	0.0918595	94.7264	67.4398	1.50779e-14	0	0	1	0	1
4153054	k__Bacteria; p__Firmicutes; c__Clostridia; o__Clostridiales; f__Ruminococcaceae; g__; s__	0.00202893	-0.0724405	0.0234116	6.02e-52	0.137979	0.009	0.00738	-0.07262	0.02704	0.382512	-0.109502	0.125259	0.955873	0.00455344	0.0822916	95.5662	57.8639	2.72282e-13	0	0.808492	-0.0148919	0.0614422	95.8562	115.03	9.06861e-25	0	0	1	0	1
193969	k__Bacteria; p__Firmicutes; c__Clostridia; o__Clostridiales; f__Lachnospiraceae; g__Coprococcus; s__	8.5893e-05	-0.0876454	0.0222414	2.29e-60	0.0991214	0.006	0.02402	-0.05203	0.02302	0.266595	-0.156255	0.140187	0.967368	-0.002809	0.0686632	95.1771	43.439	3.6926e-10	0	0.627228	-0.0260225	0.0535847	95.6657	102.557	4.38196e-22	0	0	1	0	1
553080	k__Bacteria; p__Firmicutes; c__Clostridia; o__Clostridiales; f__; g__; s__	6.84458e-05	-0.0964921	0.0240433	6.06e-27	0.0464255	0.004	0.35028	-0.03218	0.03444	0.24941	-0.146417	0.125579	0.989871	-0.000513771	0.0404707	73.363	7.47025	0.0238702	0	0.401815	-0.0343826	0.0410105	89.3752	41.2717	5.72646e-09	0	0	0	0	0
																				8							13	18	34	7	49

## Sheet: Supplementary Table 5
Supplementary Table 5. Human genomic analyses at adiposity-related candidate host genes FHIT, TDRG1 and ELAVL4. The table shows significant genetic associations between the adiposity-related candidate host genetic variants and adiposity-associated OTUs. The final three columns summarize the results of the association between the host genetic variants and DNA methylation at CpG sites targetted by …
SNP	Chromosome	Gene	OTU associations					Methylation Associations in adipose tissue
			OTU	Taxonomy	P Value	Beta	SE	CG	P Value	Beta
rs74331972	3	FHIT	181702	k__Bacteria; p__Firmicutes; c__Clostridia; o__Clostridiales; f__; g__; s__	2.48878e-06	0.329019	0.0694839	cg15570148	0.00034	0.353404
rs1433723	6	TDRG1	New.0.CleanUp.ReferenceOTU25576	k__Bacteria; p__Firmicutes; c__Clostridia; o__Clostridiales; f__; g__; s__	4.31664e-06	0.222999	0.0482696	cg10553343	1.53e-17	-0.56489
rs1433722	6	TDRG1	New.0.CleanUp.ReferenceOTU25576	k__Bacteria; p__Firmicutes; c__Clostridia; o__Clostridiales; f__; g__; s__	4.88571e-06	0.221359	0.0481888	NA	NA	NA
rs2480677	1	ELAVL4	194733	k__Bacteria; p__Firmicutes; c__Clostridia; o__Clostridiales; f__Lachnospiraceae; g__Blautia; s__	4.95025e-06	0.298674	0.0650594	cg00322486	0.0014	-0.311868

## Sheet: Supplementary Table 6
Supplementary Table 6. List of the 97 BMI-associated loci reported in Locke et al. (2015) that were used for analysis in this study. The last column denotes the BMI GWAS p-values from Locke et al. (2015).
SNP	Chromosome	Position	Gene	effect_allele	other_allele	Locke et al. BMI GWAS P-value
rs977747	1	47457264	TAL1	T	G	5.306e-05
rs657452	1	49362434	AGBL4	A	G	1.439e-05
rs11583200	1	50332407	ELAVL4	C	T	5.184e-05
rs3101336	1	72523773	NEGR1	C	T	9.167e-16
rs12566985	1	74774781	FPGT-TNNI3K	G	A	1.59e-06
rs12401738	1	78219349	FUBP1	A	G	1.313e-07
rs11165643	1	96696685	PTBP2	T	C	9.407e-09
rs17024393	1	109956211	GNAT2	C	T	7.194e-06
rs543874	1	176156103	SEC16B	G	A	4.974e-23
rs2820292	1	200050910	NAV1	C	A	1.282e-05
rs13021737	2	622348	TMEM18	G	A	4.852e-29
rs10182181	2	25003800	ADCY3	G	A	1.097e-10
rs11126666	2	26782315	KCNK3	A	G	0.007131
rs1016287	2	59159129	LINC01122	T	C	1.737e-10
rs11688816	2	62906552	EHBP1	G	A	1.59e-06
rs2121279	2	142759755	LRP1B	T	C	3.293e-05
rs1460676	2	164275935	FIGN	C	T	9.232e-07
rs1528435	2	181259207	UBE2E3	T	C	9.998e-05
rs17203016	2	207963763	CREB1	G	A	0.0001268
rs7599312	2	213121476	ERBB4	G	A	0.0007871
rs492400	2	219057996	USP37	C	T	0.0007361
rs2176040	2	226801046	LOC646736	A	G	0.02256
rs6804842	3	25081441	RARB	G	A	0.0004863
rs2365389	3	61211502	FHIT	C	T	2.238e-06
rs3849570	3	81874802	GBE1	A	C	0.001013
rs13078960	3	85890280	CADM2	G	T	9.386e-08
rs16851483	3	142758126	RASA2	T	G	2.785e-10
rs1516725	3	187306698	ETV5	C	T	1.489e-12
rs10938397	4	44877284	GNPDA2	G	A	2.892e-22
rs17001654	4	77348592	SCARB2	G	C	3.891e-06
rs13107325	4	103407732	SLC39A8	T	C	4.21e-06
rs11727676	4	145878514	HHIP	T	C	0.001145
rs2112347	5	75050998	POC5	T	G	6.986e-09
rs7715256	5	153518086	GALNT10	G	T	1.154e-05
rs205262	6	34671142	C6orf106	G	A	0.0001428
rs2033529	6	40456631	TDRG1	G	A	0.0002649
rs2207139	6	50953449	TFAP2B	G	A	7.426e-16
rs9400239	6	109084356	FOXO3	C	T	0.0005353
rs9374842	6	120227364	LOC285762	T	C	2.769e-07
rs13201877	6	137717234	IFNGR1	G	A	0.0003142
rs13191362	6	162953340	PARK2	A	G	2.859e-06
rs1167827	7	75001105	HIP1	G	A	3.773e-05
rs2245368	7	76446079	PMS2L11	C	T	1.112e-06
rs9641123	7	93035668	CALCR	C	G	1.606e-10
rs6465468	7	95007450	ASB4	T	G	1.639e-05
rs17405819	8	76969139	HNF4G	T	C	1.612e-09
rs16907751	8	81538012	ZBTB10	C	T	0.0006018
rs2033732	8	85242264	RALYL	C	T	0.001113
rs4740619	9	15624326	C9orf93	T	C	0.000869
rs10968576	9	28404339	LINGO2	G	A	1.414e-08
rs6477694	9	110972163	EPB41L4B	C	T	0.0003468
rs1928295	9	119418304	TLR4	T	C	6.763e-06
rs10733682	9	128500735	LMX1B	A	G	1.483e-07
rs7899106	10	87400884	GRID1	G	A	1.802e-06
rs17094222	10	102385430	HIF1AN	C	T	3.803e-05
rs11191560	10	104859028	NT5C2	C	T	0.001559
rs7903146	10	114748339	TCF7L2	C	T	0.004238
rs4256980	11	8630515	TRIM66	G	C	1.091e-06
rs11030104	11	27641093	BDNF	A	G	8.779e-13
rs2176598	11	43820854	HSD17B12	T	C	4.829e-06
rs3817334	11	47607569	MTCH2	T	C	3.595e-09
rs12286929	11	114527614	CADM1	G	A	0.0002385
rs7138803	12	48533735	BCDIN3D	A	G	6.917e-16
rs11057405	12	121347850	CLIP1	G	A	0.002241
rs12016871	13	26915782	MTIF3	T	C	2.428e-08
rs12429545	13	53000207	OLFM4	A	G	1.811e-08
rs9540493	13	65103705	MIR548X2	A	G	0.0007315
rs1441264	13	78478920	MIR548A2	A	G	0.0004521
rs10132280	14	24998019	STXBP6	C	A	4.868e-05
rs12885454	14	28806589	PRKD1	C	A	0.002127
rs11847697	14	29584863	PRKD1	T	C	5.048e-06
rs7141420	14	78969207	NRXN3	T	C	8.09e-11
rs3736485	15	49535902	DMXL2	A	G	0.0005718
rs16951275	15	65864222	MAP2K5	T	C	5.178e-11
rs7164727	15	70881044	LOC100287559	T	C	0.0003308
rs758747	16	3567359	NLRC3	T	C	0.001722
rs12446632	16	19842890	GPRC5B	G	A	8.504e-13
rs2650492	16	28240912	SBK1	A	G	2.356e-05
rs3888190	16	28796987	ATP2A1	A	C	7.734e-12
rs4787491	16	29922838	INO80E	G	A	7.307e-07
rs9925964	16	31037396	KAT8	A	G	4.711e-05
rs2080454	16	47620091	CBLN1	C	A	5.65e-06
rs1558902	16	52361075	FTO	A	T	6.299e-88
rs9914578	17	1951886	SMG6	G	C	0.1215
rs1000940	17	5223976	RABEP1	G	A	1.628e-05
rs12940622	17	76230166	RPTOR	G	A	5.306e-05
rs1808579	18	19358886	C18orf8	C	T	1.001e-06
rs7239883	18	38401669	LOC284260	G	A	1.439e-05
rs7243357	18	55034299	GRP	T	G	0.000559
rs6567160	18	55980115	MC4R	C	T	2.327e-35
rs17724992	19	18315825	PGPEP1	A	G	4.69e-05
rs29941	19	39001372	KCTD15	G	A	1.32e-06
rs2075650	19	50087459	TOMM40	A	G	0.0008437
rs2287019	19	50894012	QPCTL	C	T	1.213e-08
rs3810291	19	52260843	ZC3H4	A	G	5.273e-10
rs6091540	20	50521269	ZFP64	C	T	4.383e-06
rs2836754	21	39213610	ETS2	C	T	0.001003

## Sheet: Supplementary Table 7
Supplementary Table 7. Demographics of the TwinsUK microbiome discovery sample and the American Gut replication sample.
	TUK-D	AG	FGFP	TUK-R
No of Samples	1313	2609	917	1031
Sex
Female	1266	1394	511	823
Male	47	1214	406	207
Other	0	1	0	1
Age (Average and range)	62.6 (32 - 87)	50.7 (21-94)	50.81 (21 - 85)	57.3 (20-89)
BMI (Average and range)	26.1 (16.2 - 45.9)	24.4 (15.8 - 49.6)	24.0 (18.6 - 30.0)	24.5 (18.5 - 30.18)
Country
United States	0	2191		0
Canada	0	35		0
Australia	0	14		0
United Kingdom	1313	369		1031
Belgium	0	0	917	0
Race/Ethnicity
Caucasian	1295	2609	917	1031
Asian	1	0	0	0
Black	4	0	0	0
Mixed	4	0	0	0
Unknown	8	0	0	0
Smoking
Current	55	150	84	57
Ex	262	0	0	222
Non-smoker	534	2459	833	441
NA	462	0	0	311
Sample Method
Postal	229	2609	0	100
Visit	1084	0	917	931

## Sheet: Supplementary Table 8
Supplementary Table 8. ENA accession IDs for samples in this study currently available online and basic metadata.
EBI_sample_accession	EBI_HOST_SUBJECT_ID	EBI_FAMILY_ID	EBI_TWIN_ID	zygosity	age	sex	collection_date	collection_method	Discovery Set
ERS1131234	ID107791	ID10779	ID107791	DZ	49	female	2010-11-11	Visit	1
ERS1131202	ID100961	ID10096	ID100961	MZ	64	female	11/22/10	Visit	1
ERS1131246	ID110282	ID11028	ID110282	MZ	61	female	11/25/10	Visit	1
ERS1131261	ID113782	ID11378	ID113782	MZ	53	female	2010-02-11	Visit	1
ERS1131203	ID100962	ID10096	ID100962	MZ	64	female	11/23/10	Visit	1
ERS1131256	ID112421	ID11242	ID112421	DZ	66	female	11/20/10	Visit	1
ERS1131205	ID102041	ID10204	ID102041	MZ	63	female	11/19/10	Postal	1
ERS1131220	ID104991	ID10499	ID104991	DZ	79	female	2011-05-01	Visit	1
ERS1131233	ID107692	ID10769	ID107692	DZ	53	female	2010-03-12	Visit	1
ERS1131237	ID108361	ID10836	ID108361	DZ	68	female	12/13/10	Visit	1
ERS1131230	ID107112	ID10711	ID107112	MZ	65	female	12/16/10	Visit	1
ERS1131219	ID104951	ID10495	ID104951	DZ	61	female	12/15/10	Visit	1
ERS1131221	ID105502	ID10550	ID105502	MZ	69	female	10/30/10	Visit	1
ERS1131245	ID110191	ID11019	ID110191	DZ	54	female	1/18/11	Postal	1
ERS1131269	ID114882	ID11488	ID114882	DZ	59	female	2011-04-01	Visit	1
ERS1131265	ID114072	ID11407	ID114072	MZ	59	female	2011-02-01	Visit	1
ERS1131204	ID101202	ID10120	ID101202	MZ	69	female	1/24/11	Visit	1
ERS1131240	ID108841	ID10884	ID108841	DZ	64	female	1/23/11	Visit	1
ERS1131206	ID102052	ID10205	ID102052	MZ	61	female	2010-03-11	Visit	1
ERS1131218	ID104862	ID10486	ID104862	DZ	56	female	1/18/11	Visit	1
ERS1131211	ID103382	ID10338	ID103382	MZ	54	female	2/17/11	Visit	1
ERS1131253	ID111381	ID11138	ID111381	DZ	64	female	2011-08-02	Visit	1
ERS1131257	ID113182	ID11318	ID113182	DZ	61	female	2/13/11	Visit	1
ERS1131268	ID114861	ID11486	ID114861	MZ	60	female	4/19/11	Visit	1
ERS1131249	ID110351	ID11035	ID110351	MZ	61	female	10/23/10	Visit	1
ERS1131217	ID104821	ID10482	ID104821	DZ	77	female	2011-10-03	Visit	1
ERS1131213	ID103542	ID10354	ID103542	DZ	68	female	2011-02-03	Visit	1
ERS1131244	ID109701	ID10970	ID109701	DZ	62	female	3/16/11	Visit	1
ERS1131232	ID107382	ID10738	ID107382	MZ	75	female	2011-09-03	Visit	1
ERS1131196	ID100051	ID10005	ID100051	DZ	67	female	2/26/11	Visit	1
ERS1131228	ID106802	ID10680	ID106802	MZ	79	female	3/15/11	Visit	1
ERS1131207	ID102131	ID10213	ID102131	MZ	58	female	2011-02-03	Visit	1
ERS1131197	ID100601	ID10060	ID100601	MZ	65	female	2011-09-03	Visit	1
ERS1131259	ID113662	ID11366	ID113662	MZ	70	female	2011-03-02	Visit	1
ERS1131248	ID110352	ID11035	ID110352	MZ	61	female	10/23/10	Visit	1
ERS1131229	ID107111	ID10711	ID107111	MZ	65	female	12/15/10	Visit	1
ERS1131210	ID103381	ID10338	ID103381	MZ	54	female	2/17/11	Visit	1
ERS1131251	ID110602	ID11060	ID110602	MZ	56	female	5/25/11	Visit	1
ERS1131212	ID103512	ID10351	ID103512	DZ	64	female	2011-08-05	Visit	1
ERS1131271	ID115052	ID11505	ID115052	DZ	75	female	2011-02-05	Visit	1
ERS1131258	ID113482	ID11348	ID113482	DZ	58	female	5/31/11	Visit	1
ERS1131223	ID105922	ID10592	ID105922	MZ	62	female	2011-07-01	Visit	1
ERS1131238	ID108362	ID10836	ID108362	DZ	68	female	2010-10-12	Visit	1
ERS1131224	ID106072	ID10607	ID106072	MZ	63	female	2011-11-01	Visit	1
ERS1131242	ID109592	ID10959	ID109592	MZ	69	female	2010-12-11	Visit	1
ERS1131250	ID110601	ID11060	ID110601	MZ	56	female	5/25/11	Visit	1
ERS1131263	ID113822	ID11382	ID113822	MZ	60	female	2011-07-03	Visit	1
ERS1131227	ID106682	ID10668	ID106682	DZ	62	female	1/30/11	Visit	1
ERS1131201	ID100952	ID10095	ID100952	DZ	64	female	1/27/11	Visit	1
ERS1131239	ID108532	ID10853	ID108532	DZ	58	female	11/16/10	Visit	1
ERS1131241	ID109262	ID10926	ID109262	DZ	63	female	2/26/11	Visit	1
ERS1131216	ID104642	ID10464	ID104642	DZ	50	female	2/26/11	Postal	1
ERS1131247	ID110322	ID11032	ID110322	DZ	63	female	2/17/11	Visit	1
ERS1131243	ID109691	ID10969	ID109691	DZ	67	female	3/21/11	Visit	1
ERS1131285	ID103251	ID10325	ID103251	DZ	42	female	5/31/11	Visit	1
ERS1131319	ID112801	ID11280	ID112801	DZ	63	female	2011-12-09	Visit	1
ERS1131283	ID102772	ID10277	ID102772	DZ	49	female	7/28/11	Visit	1
ERS1131314	ID112711	ID11271	ID112711	DZ	62	female	11/19/11	Visit	1
ERS1131311	ID111802	ID11180	ID111802	DZ	74	female	11/21/11	Visit	1
ERS1131294	ID106322	ID10632	ID106322	DZ	46	female	11/28/11	Visit	1
ERS1131279	ID101181	ID10118	ID101181	MZ	63	female	2011-11-09	Visit	1
ERS1131282	ID102201	ID10220	ID102201	DZ	64	female	11/17/11	Visit	1
ERS1131293	ID106301	ID10630	ID106301	MZ	61	female	11/21/11	Visit	1
ERS1131281	ID101821	ID10182	ID101821	DZ	64	female	10/19/11	Visit	1
ERS1131317	ID112731	ID11273	ID112731	DZ	53	female	2011-10-09	Visit	1
ERS1131296	ID106941	ID10694	ID106941	MZ	38	female	9/26/11	Visit	1
ERS1131277	ID100871	ID10087	ID100871	DZ	69	female	2011-01-11	Postal	1
ERS1131298	ID107941	ID10794	ID107941	DZ	62	female	2011-05-11	Postal	1
ERS1131310	ID111801	ID11180	ID111801	DZ	74	female	11/22/11	Visit	1
ERS1131284	ID102871	ID10287	ID102871	DZ	57	female	2011-05-12	Visit	1
ERS1131313	ID112691	ID11269	ID112691	DZ	61	female	9/28/11	Visit	1
ERS1131299	ID107962	ID10796	ID107962	DZ	54	female	2011-06-11	Visit	1
ERS1131287	ID105242	ID10524	ID105242	DZ	59	female	10/30/11	Visit	1
ERS1131274	ID100011	ID10001	ID100011	DZ	52	female	2011-04-10	Visit	1
ERS1131309	ID110211	ID11021	ID110211	DZ	54	female	2011-06-11	Visit	1
ERS1131372	ID108941	ID10894	ID108941	MZ	59	female	2010-02-11	Visit	1
ERS1131376	ID109082	ID10908	ID109082	MZ	71	female	2010-07-11	Visit	1
ERS1131398	ID114751	ID11475	ID114751	MZ	65	female	2010-09-11	Visit	1
ERS1131337	ID102051	ID10205	ID102051	MZ	61	female	2010-02-11	Visit	1
ERS1131365	ID107671	ID10767	ID107671	MZ	73	female	2010-02-11	Visit	1
ERS1131368	ID107812	ID10781	ID107812	DZ	64	female	2010-11-11	Postal	1
ERS1131392	ID112422	ID11242	ID112422	DZ	66	female	11/21/10	Visit	1
ERS1131356	ID106251	ID10625	ID106251	DZ	61	female	11/22/10	Visit	1
ERS1131380	ID109392	ID10939	ID109392	DZ	56	female	11/21/10	Visit	1
ERS1131335	ID101232	ID10123	ID101232	MZ	48	female	11/26/10	Visit	1
ERS1131339	ID102451	ID10245	ID102451	MZ	72	female	11/29/10	Visit	1
ERS1131351	ID105622	ID10562	ID105622	DZ	67	female	11/22/10	Visit	1
ERS1131331	ID100892	ID10089	ID100892	DZ	57	female	11/21/10	Visit	1
ERS1131395	ID114071	ID11407	ID114071	MZ	59	female	2011-03-01	Visit	1
ERS1131375	ID109081	ID10908	ID109081	MZ	71	female	2010-07-11	Visit	1
ERS1131366	ID107691	ID10769	ID107691	DZ	53	female	12/15/10	Visit	1
ERS1131358	ID106681	ID10668	ID106681	DZ	62	female	1/31/11	Visit	1
ERS1131350	ID105581	ID10558	ID105581	MZ	66	female	1/16/11	Visit	1
ERS1131404	ID115782	ID11578	ID115782	DZ	68	female	1/25/11	Visit	1
ERS1131330	ID100021	ID10002	ID100021	DZ	62	female	1/13/11	Visit	1
ERS1131347	ID104861	ID10486	ID104861	DZ	56	female	1/18/11	Visit	1
ERS1131377	ID109211	ID10921	ID109211	MZ	74	female	1/27/11	Visit	1
ERS1131399	ID114752	ID11475	ID114752	MZ	65	female	2010-08-11	Visit	1
ERS1131334	ID101201	ID10120	ID101201	MZ	69	female	1/24/11	Postal	1
ERS1131345	ID104101	ID10410	ID104101	DZ	62	female	1/18/11	Visit	1
ERS1131401	ID115611	ID11561	ID115611	DZ	67	female	2011-04-02	Visit	1
ERS1131340	ID102751	ID10275	ID102751	MZ	47	female	2011-10-02	Visit	1
ERS1131396	ID114081	ID11408	ID114081	MZ	51	female	2010-08-11	Visit	1
ERS1131384	ID110201	ID11020	ID110201	DZ	80	female	2011-07-02	Visit	1
ERS1131348	ID105302	ID10530	ID105302	DZ	68	female	1/31/11	Visit	1
ERS1131373	ID108971	ID10897	ID108971	DZ	64	female	2011-07-02	Visit	1
ERS1131359	ID106711	ID10671	ID106711	DZ	67	female	2011-03-02	Visit	1
ERS1131378	ID109222	ID10922	ID109222	DZ	55	female	2/16/11	Visit	1
ERS1131391	ID112221	ID11222	ID112221	DZ	72	female	2011-03-04	Postal	1
ERS1131349	ID105501	ID10550	ID105501	MZ	69	female	10/30/10	Visit	1
ERS1131371	ID108151	ID10815	ID108151	DZ	39	female	4/15/11	Postal	1
ERS1131342	ID103361	ID10336	ID103361	DZ	50	female	2/22/11	Visit	1
ERS1131333	ID100931	ID10093	ID100931	DZ	56	female	2/23/11	Visit	1
ERS1131338	ID102432	ID10243	ID102432	DZ	65	female	11/14/10	Visit	1
ERS1131382	ID109702	ID10970	ID109702	DZ	62	female	3/14/11	Visit	1
ERS1131354	ID105831	ID10583	ID105831	DZ	68	female	2011-01-03	Visit	1
ERS1131332	ID100911	ID10091	ID100911	MZ	53	female	2011-08-03	Visit	1
ERS1131360	ID106781	ID10678	ID106781	MZ	55	female	2011-08-03	Visit	1
ERS1131386	ID110272	ID11027	ID110272	MZ	60	female	2/28/11	Visit	1
ERS1131367	ID107811	ID10781	ID107811	DZ	64	female	2010-11-11	Visit	1
ERS1131370	ID107932	ID10793	ID107932	DZ	72	female	2011-01-03	Visit	1
ERS1131473	ID112822	ID11282	ID112822	DZ	58	female	1/20/11	Visit	1
ERS1131431	ID106071	ID10607	ID106071	MZ	63	female	2011-11-01	Visit	1
ERS1131419	ID102792	ID10279	ID102792	DZ	78	female	5/29/11	Visit	1
ERS1131456	ID110332	ID11033	ID110332	MZ	44	female	5/16/11	Visit	1
ERS1131427	ID105612	ID10561	ID105612	DZ	56	female	2011-07-05	Visit	1
ERS1131430	ID105952	ID10595	ID105952	DZ	56	female	5/30/11	Visit	1
ERS1131476	ID113622	ID11362	ID113622	DZ	73	female	2/15/11	Visit	1
ERS1131447	ID109261	ID10926	ID109261	DZ	63	female	2/27/11	Visit	1
ERS1131423	ID104591	ID10459	ID104591	DZ	55	female	2/23/11	Visit	1
ERS1131446	ID109031	ID10903	ID109031	DZ	64	female	5/26/11	Visit	1
ERS1131439	ID107831	ID10783	ID107831	MZ	72	female	3/26/11	Visit	1
ERS1131432	ID106772	ID10677	ID106772	DZ	73	female	2011-01-05	Visit	1
ERS1131461	ID110741	ID11074	ID110741	DZ	52	female	2011-04-04	Visit	1
ERS1131425	ID104981	ID10498	ID104981	MZ	69	female	2/27/11	Visit	1
ERS1131480	ID114852	ID11485	ID114852	MZ	59	female	2011-05-04	Visit	1
ERS1131453	ID109591	ID10959	ID109591	MZ	69	female	11/14/10	Visit	1
ERS1131443	ID108531	ID10853	ID108531	DZ	58	female	11/17/10	Visit	1
ERS1131444	ID108942	ID10894	ID108942	MZ	59	female	2010-03-11	Postal	1
ERS1131458	ID110541	ID11054	ID110541	MZ	50	female	11/17/10	Visit	1
ERS1131428	ID105711	ID10571	ID105711	DZ	66	female	11/15/10	Visit	1
ERS1131408	ID101222	ID10122	ID101222	DZ	42	female	11/19/10	Visit	1
ERS1131438	ID107672	ID10767	ID107672	MZ	73	female	2010-01-11	Visit	1
ERS1131440	ID107912	ID10791	ID107912	DZ	63	female	2011-10-05	Visit	1
ERS1131434	ID107141	ID10714	ID107141	DZ	51	female	11/30/10	Visit	1
ERS1131414	ID102191	ID10219	ID102191	DZ	86	female	2010-08-12	Visit	1
ERS1131465	ID111481	ID11148	ID111481	DZ	63	female	2010-10-12	Visit	1
ERS1131454	ID109601	ID10960	ID109601	MZ	59	female	3/15/11	Visit	1
ERS1131415	ID102192	ID10219	ID102192	DZ	86	female	2010-08-12	Visit	1
ERS1131409	ID101231	ID10123	ID101231	MZ	48	female	11/19/10	Visit	1
ERS1131474	ID113241	ID11324	ID113241	DZ	60	female	2010-08-12	Visit	1
ERS1131466	ID111482	ID11148	ID111482	DZ	63	female	2010-09-12	Visit	1
ERS1131418	ID102452	ID10245	ID102452	MZ	72	female	11/29/10	Visit	1
ERS1131448	ID109391	ID10939	ID109391	DZ	56	female	11/21/10	Visit	1
ERS1131429	ID105712	ID10571	ID105712	DZ	66	female	11/15/10	Visit	1
ERS1131424	ID104851	ID10485	ID104851	MZ	61	female	11/20/10	Visit	1
ERS1131416	ID102421	ID10242	ID102421	DZ	62	female	11/22/10	Visit	1
ERS1131417	ID102422	ID10242	ID102422	DZ	62	female	11/22/10	Visit	1
ERS1131482	ID115771	ID11577	ID115771	MZ	68	female	11/23/10	Visit	1
ERS1131426	ID105582	ID10558	ID105582	MZ	66	female	1/16/11	Visit	1
ERS1131467	ID112411	ID11241	ID112411	DZ	67	female	1/19/11	Visit	1
ERS1131470	ID112682	ID11268	ID112682	DZ	57	female	1/16/11	Visit	1
ERS1131405	ID100022	ID10002	ID100022	DZ	62	female	1/14/11	Visit	1
ERS1131472	ID112821	ID11282	ID112821	DZ	58	female	1/20/11	Visit	1
ERS1131412	ID101951	ID10195	ID101951	MZ	72	female	1/17/11	Visit	1
ERS1131420	ID103802	ID10380	ID103802	MZ	56	female	2011-10-01	Visit	1
ERS1131406	ID100031	ID10003	ID100031	DZ	65	female	2011-09-01	Visit	1
ERS1131459	ID110542	ID11054	ID110542	MZ	50	female	11/17/10	Visit	1
ERS1131450	ID109542	ID10954	ID109542	MZ	63	female	2011-04-01	Visit	1
ERS1131531	ID110281	ID11028	ID110281	MZ	61	female	11/24/10	Visit	1
ERS1131536	ID111792	ID11179	ID111792	MZ	61	female	2011-07-02	Visit	1
ERS1131510	ID105641	ID10564	ID105641	DZ	60	female	2011-12-10	Visit	1
ERS1131512	ID105902	ID10590	ID105902	MZ	62	female	1/25/11	Visit	1
ERS1131527	ID109501	ID10950	ID109501	DZ	71	female	11/15/10	Visit	1
ERS1131492	ID102441	ID10244	ID102441	DZ	66	female	2/22/11	Visit	1
ERS1131494	ID102771	ID10277	ID102771	DZ	49	female	7/29/11	Visit	1
ERS1131544	ID114562	ID11456	ID114562	MZ	70	female	3/17/11	Visit	1
ERS1131511	ID105901	ID10590	ID105901	MZ	62	female	1/25/11	Visit	1
ERS1131491	ID102442	ID10244	ID102442	DZ	66	female	2/22/11	Visit	1
ERS1131532	ID110312	ID11031	ID110312	DZ	72	female	2011-02-04	Visit	1
ERS1131508	ID104982	ID10498	ID104982	MZ	69	female	2/27/11	Visit	1
ERS1131499	ID103252	ID10325	ID103252	DZ	42	female	2011-02-06	Visit	1
ERS1131540	ID113242	ID11324	ID113242	DZ	60	female	2010-08-12	Visit	1
ERS1131490	ID102152	ID10215	ID102152	DZ	50	female	2011-02-11	Visit	1
ERS1131495	ID102872	ID10287	ID102872	DZ	57	female	11/24/11	Postal	1
ERS1131549	ID115981	ID11598	ID115981	DZ	57	female	2011-07-04	Visit	1
ERS1131547	ID115041	ID11504	ID115041	DZ	59	female	10/16/11	Postal	1
ERS1131493	ID102462	ID10246	ID102462	DZ	66	female	1/24/11	Visit	1
ERS1131497	ID103011	ID10301	ID103011	DZ	62	female	3/30/11	Visit	1
ERS1131509	ID105311	ID10531	ID105311	DZ	71	female	9/24/11	Visit	1
ERS1131537	ID111791	ID11179	ID111791	MZ	61	female	2011-09-02	Visit	1
ERS1131520	ID107802	ID10780	ID107802	MZ	66	female	2011-03-11	Visit	1
ERS1131489	ID101822	ID10182	ID101822	DZ	64	female	10/21/11	Visit	1
ERS1131523	ID108372	ID10837	ID108372	MZ	60	female	2011-10-04	Visit	1
ERS1131519	ID107801	ID10780	ID107801	MZ	66	female	2011-01-11	Visit	1
ERS1131498	ID103232	ID10323	ID103232	DZ	51	female	11/24/11	Postal	1
ERS1131528	ID109711	ID10971	ID109711	DZ	45	female	5/14/11	Visit	1
ERS1131543	ID113781	ID11378	ID113781	MZ	53	female	2010-03-12	Visit	1
ERS1131484	ID100831	ID10083	ID100831	MZ	50	female	5/31/11	Visit	1
ERS1131529	ID110262	ID11026	ID110262	MZ	64	female	3/22/11	Visit	1
ERS1131514	ID105941	ID10594	ID105941	DZ	45	female	9/19/11	Visit	1
ERS1131488	ID101221	ID10122	ID101221	DZ	42	female	11/19/10	Visit	1
ERS1131507	ID104791	ID10479	ID104791	DZ	49	female	2011-03-06	Visit	1
ERS1131530	ID110271	ID11027	ID110271	MZ	60	female	2/28/11	Visit	1
ERS1131502	ID103422	ID10342	ID103422	DZ	71	female	2011-12-01	Visit	1
ERS1131548	ID115042	ID11504	ID115042	DZ	59	female	2011-09-10	Visit	1
ERS1131486	ID101142	ID10114	ID101142	DZ	63	female	1/15/11	Visit	1
ERS1131578	ID113471	ID11347	ID113471	MZ	55	female	10/25/11	Visit	1
ERS1131569	ID108221	ID10822	ID108221	DZ	71	female	5/31/11	Visit	1
ERS1131561	ID105241	ID10524	ID105241	DZ	59	female	2011-03-11	Visit	1
ERS1131575	ID113452	ID11345	ID113452	DZ	63	female	11/28/11	Visit	1
ERS1131563	ID105801	ID10580	ID105801	DZ	64	female	9/13/11	Visit	1
ERS1131564	ID106591	ID10659	ID106591	MZ	75	female	2011-07-11	Visit	1
ERS1131574	ID113061	ID11306	ID113061	DZ	54	female	2011-02-11	Postal	1
ERS1131582	ID114721	ID11472	ID114721	DZ	64	female	11/15/11	Visit	1
ERS1131560	ID104792	ID10479	ID104792	DZ	49	female	5/29/11	Visit	1
ERS1131556	ID103231	ID10323	ID103231	DZ	51	female	2011-08-11	Visit	1
ERS1131554	ID102072	ID10207	ID102072	DZ	52	female	10/15/11	Visit	1
ERS1131568	ID108091	ID10809	ID108091	MZ	49	female	2011-01-11	Visit	1
ERS1131553	ID101932	ID10193	ID101932	MZ	69	female	11/16/11	Visit	1
ERS1131618	ID109551	ID10955	ID109551	DZ	64	female	9/25/11	Visit	1
ERS1131614	ID109041	ID10904	ID109041	DZ	65	female	2/29/12	Visit	1
ERS1131622	ID110571	ID11057	ID110571	DZ	59	female	10/21/11	Visit	1
ERS1131629	ID112692	ID11269	ID112692	DZ	61	female	9/27/11	Visit	1
ERS1131592	ID101811	ID10181	ID101811	DZ	59	female	1/23/12	Visit	1
ERS1131605	ID105571	ID10557	ID105571	DZ	63	female	12/15/11	Visit	1
ERS1131635	ID115831	ID11583	ID115831	DZ	68	female	3/13/12	Visit	1
ERS1131603	ID104831	ID10483	ID104831	DZ	71	female	1/16/12	Visit	1
ERS1131610	ID106592	ID10659	ID106592	MZ	75	female	2011-05-11	Visit	1
ERS1131600	ID103791	ID10379	ID103791	DZ	61	female	2011-05-10	Visit	1
ERS1131597	ID102151	ID10215	ID102151	DZ	50	female	2011-01-11	Visit	1
ERS1131593	ID101931	ID10193	ID101931	MZ	69	female	11/17/11	Visit	1
ERS1131637	ID115971	ID11597	ID115971	DZ	58	female	2/15/12	Visit	1
ERS1131609	ID106061	ID10606	ID106061	DZ	47	female	2/13/12	Visit	1
ERS1131584	ID100041	ID10004	ID100041	MZ	60	female	2011-10-10	Visit	1
ERS1131588	ID100841	ID10084	ID100841	DZ	47	female	11/15/11	Visit	1
ERS1131613	ID108222	ID10822	ID108222	DZ	71	female	2011-01-06	Visit	1
ERS1131591	ID101812	ID10181	ID101812	DZ	59	female	1/22/12	Visit	1
ERS1131634	ID114872	ID11487	ID114872	DZ	68	female	1/19/12	Visit	1
ERS1131587	ID100371	ID10037	ID100371	DZ	81	female	1/31/12	Visit	1
ERS1131628	ID112581	ID11258	ID112581	MZ	47	female	12/18/11	Visit	1
ERS1131595	ID102121	ID10212	ID102121	DZ	53	female	1/21/12	Visit	1
ERS1131620	ID109732	ID10973	ID109732	MZ	54	female	1/27/12	Visit	1
ERS1131619	ID109562	ID10956	ID109562	DZ	63	female	2012-09-03	Visit	1
ERS1131596	ID102122	ID10212	ID102122	DZ	53	female	1/22/12	Visit	1
ERS1131598	ID102202	ID10220	ID102202	DZ	64	female	11/16/11	Visit	1
ERS1131623	ID110572	ID11057	ID110572	DZ	59	female	10/21/11	Visit	1
ERS1131636	ID115832	ID11583	ID115832	DZ	68	female	2012-10-03	Visit	1
ERS1131606	ID105601	ID10560	ID105601	DZ	83	female	3/20/12	Visit	1
ERS1131684	ID110812	ID11081	ID110812	MZ	79	female	2012-11-12	Visit	1
ERS1131708	ID115661	ID11566	ID115661	MZ	59	female	12/13/12	Visit	1
ERS1131647	ID101992	ID10199	ID101992	MZ	64	female	2012-06-12	Visit	1
ERS1131674	ID107742	ID10774	ID107742	MZ	67	female	12/16/12	Visit	1
ERS1131668	ID107242	ID10724	ID107242	MZ	77	female	2012-01-12	Visit	1
ERS1131683	ID110811	ID11081	ID110811	MZ	79	female	2012-11-12	Visit	1
ERS1131664	ID106631	ID10663	ID106631	MZ	65	female	2012-12-12	Visit	1
ERS1131682	ID110792	ID11079	ID110792	DZ	38	female	11/30/12	Postal	1
ERS1131710	ID115741	ID11574	ID115741	DZ	60	female	2013-07-01	Visit	1
ERS1131672	ID107641	ID10764	ID107641	DZ	42	female	2012-11-12	Visit	1
ERS1131702	ID115332	ID11533	ID115332	MZ	48	female	2012-12-12	Visit	1
ERS1131701	ID115331	ID11533	ID115331	MZ	48	female	2012-12-12	Visit	1
ERS1131709	ID115662	ID11566	ID115662	MZ	59	female	12/14/12	Visit	1
ERS1131639	ID100342	ID10034	ID100342	DZ	35	female	2012-11-12	Visit	1
ERS1131659	ID105552	ID10555	ID105552	MZ	68	female	2012-12-12	Visit	1
ERS1131695	ID114172	ID11417	ID114172	MZ	55	female	2012-02-12	Visit	1
ERS1131677	ID109402	ID10940	ID109402	DZ	63	female	11/29/12	Visit	1
ERS1131690	ID112671	ID11267	ID112671	DZ	59	female	11/28/12	Visit	1
ERS1131694	ID114171	ID11417	ID114171	MZ	55	female	2012-03-12	Visit	1
ERS1131706	ID115622	ID11562	ID115622	DZ	77	female	12/18/12	Visit	1
ERS1131651	ID103282	ID10328	ID103282	MZ	74	female	2012-10-12	Visit	1
ERS1131675	ID108762	ID10876	ID108762	DZ	65	female	2012-10-12	Postal	1
ERS1131696	ID114531	ID11453	ID114531	MZ	76	female	2012-05-12	Visit	1
ERS1131667	ID107241	ID10724	ID107241	MZ	77	female	2012-01-12	Visit	1
ERS1131660	ID105561	ID10556	ID105561	MZ	66	female	2012-12-12	Visit	1
ERS1131638	ID100341	ID10034	ID100341	DZ	35	female	2012-10-12	Visit	1
ERS1131689	ID112451	ID11245	ID112451	MZ	72	female	2012-03-12	Visit	1
ERS1131691	ID112672	ID11267	ID112672	DZ	59	female	11/28/12	Visit	1
ERS1131686	ID111821	ID11182	ID111821	MZ	83	female	2012-04-12	Visit	1
ERS1131679	ID110011	ID11001	ID110011	MZ	69	female	2013-06-01	Visit	1
ERS1131643	ID100932	ID10093	ID100932	DZ	58	female	12/19/12	Postal	1
ERS1131673	ID107741	ID10774	ID107741	MZ	67	female	12/16/12	Visit	1
ERS1131650	ID103281	ID10328	ID103281	MZ	74	female	2012-10-12	Visit	1
ERS1131658	ID105551	ID10555	ID105551	MZ	68	female	2012-12-12	Visit	1
ERS1131697	ID114532	ID11453	ID114532	MZ	76	female	2012-02-12	Visit	1
ERS1131666	ID106641	ID10664	ID106641	MZ	64	female	12/17/12	Visit	1
ERS1131665	ID106632	ID10663	ID106632	MZ	65	female	2012-12-12	Visit	1
ERS1131707	ID115641	ID11564	ID115641	DZ	78	male	11/28/12	Visit	1
ERS1131687	ID111822	ID11182	ID111822	MZ	83	female	2012-04-12	Visit	1
ERS1131652	ID104651	ID10465	ID104651	DZ	61	female	2012-09-12	Visit	1
ERS1131698	ID114592	ID11459	ID114592	MZ	54	female	11/29/12	Visit	1
ERS1131678	ID109951	ID10995	ID109951	DZ	60	male	11/20/12	Visit	1
ERS1131754	ID109401	ID10940	ID109401	DZ	63	female	11/29/12	Visit	1
ERS1131712	ID100691	ID10069	ID100691	DZ	51	female	11/20/12	Visit	1
ERS1131725	ID101852	ID10185	ID101852	MZ	54	female	11/28/12	Postal	1
ERS1131728	ID101892	ID10189	ID101892	MZ	46	female	11/22/12	Visit	1
ERS1131724	ID101851	ID10185	ID101851	MZ	54	female	11/26/12	Visit	1
ERS1131749	ID108761	ID10876	ID108761	DZ	65	female	11/26/12	Visit	1
ERS1131718	ID101541	ID10154	ID101541	DZ	63	female	6/18/12	Postal	1
ERS1131767	ID112232	ID11223	ID112232	MZ	44	female	2012-02-07	Postal	1
ERS1131744	ID107222	ID10722	ID107222	MZ	74	female	11/28/12	Visit	1
ERS1131769	ID112452	ID11245	ID112452	MZ	72	female	2012-03-12	Visit	1
ERS1131772	ID113952	ID11395	ID113952	MZ	71	female	11/27/12	Visit	1
ERS1131734	ID105211	ID10521	ID105211	DZ	68	female	11/21/12	Visit	1
ERS1131739	ID106041	ID10604	ID106041	DZ	72	female	11/20/12	Visit	1
ERS1131716	ID100891	ID10089	ID100891	DZ	59	female	11/20/12	Visit	1
ERS1131751	ID108902	ID10890	ID108902	MZ	47	female	11/28/12	Visit	1
ERS1131773	ID114061	ID11406	ID114061	MZ	72	female	11/25/12	Visit	1
ERS1131742	ID106701	ID10670	ID106701	DZ	58	female	11/18/12	Visit	1
ERS1131722	ID101842	ID10184	ID101842	MZ	42	female	6/19/12	Postal	1
ERS1131729	ID103081	ID10308	ID103081	MZ	70	female	2012-12-06	Postal	1
ERS1131759	ID110041	ID11004	ID110041	DZ	67	female	10/18/12	Visit	1
ERS1131741	ID106542	ID10654	ID106542	DZ	65	female	2012-06-12	Visit	1
ERS1131777	ID114591	ID11459	ID114591	MZ	54	female	11/29/12	Visit	1
ERS1131750	ID108831	ID10883	ID108831	DZ	73	female	6/18/12	Postal	1
ERS1131761	ID110791	ID11079	ID110791	DZ	38	female	11/28/12	Visit	1
ERS1131760	ID110311	ID11031	ID110311	DZ	74	female	11/20/12	Visit	1
ERS1131774	ID114062	ID11406	ID114062	MZ	72	female	11/25/12	Visit	1
ERS1131771	ID113951	ID11395	ID113951	MZ	71	female	11/27/12	Visit	1
ERS1131743	ID107221	ID10722	ID107221	MZ	74	female	11/26/12	Visit	1
ERS1131730	ID103082	ID10308	ID103082	MZ	70	female	6/13/12	Postal	1
ERS1131713	ID100692	ID10069	ID100692	DZ	51	female	11/20/12	Visit	1
ERS1131735	ID105212	ID10521	ID105212	DZ	68	female	11/21/12	Visit	1
ERS1131717	ID100972	ID10097	ID100972	MZ	71	female	2013-07-01	Visit	1
ERS1131736	ID105222	ID10522	ID105222	MZ	48	female	2013-04-01	Postal	1
ERS1131723	ID101841	ID10184	ID101841	MZ	42	female	6/19/12	Postal	1
ERS1131719	ID101542	ID10154	ID101542	DZ	63	female	6/28/12	Postal	1
ERS1131776	ID114111	ID11411	ID114111	DZ	54	female	2012-12-06	Postal	1
ERS1131731	ID104601	ID10460	ID104601	DZ	68	female	11/27/12	Visit	1
ERS1131740	ID106221	ID10622	ID106221	MZ	61	female	11/24/12	Visit	1
ERS1131831	ID108792	ID10879	ID108792	MZ	65	female	2013-09-01	Visit	1
ERS1131832	ID108811	ID10881	ID108811	MZ	50	female	6/14/12	Postal	1
ERS1131817	ID107071	ID10707	ID107071	MZ	70	female	6/25/12	Postal	1
ERS1131785	ID100971	ID10097	ID100971	MZ	71	female	2013-07-01	Visit	1
ERS1131815	ID106222	ID10622	ID106222	MZ	61	female	11/24/12	Visit	1
ERS1131826	ID108522	ID10852	ID108522	DZ	68	female	11/26/12	Visit	1
ERS1131835	ID108901	ID10890	ID108901	MZ	47	female	11/28/12	Visit	1
ERS1131842	ID111402	ID11140	ID111402	DZ	80	female	2013-07-01	Visit	1
ERS1131810	ID104602	ID10460	ID104602	DZ	68	female	11/27/12	Visit	1
ERS1131804	ID103331	ID10333	ID103331	MZ	68	female	1/28/13	Visit	1
ERS1131792	ID102022	ID10202	ID102022	MZ	67	female	2013-03-02	Visit	1
ERS1131787	ID101831	ID10183	ID101831	MZ	58	female	1/29/13	Visit	1
ERS1131800	ID103201	ID10320	ID103201	MZ	70	female	1/18/13	Visit	1
ERS1131822	ID107722	ID10772	ID107722	DZ	65	female	1/14/13	Visit	1
ERS1131827	ID108751	ID10875	ID108751	DZ	64	female	1/15/13	Visit	1
ERS1131847	ID113221	ID11322	ID113221	DZ	55	female	2013-11-01	Visit	1
ERS1131850	ID114871	ID11487	ID114871	DZ	69	female	1/21/13	Visit	1
ERS1131844	ID112202	ID11220	ID112202	MZ	50	female	1/17/13	Visit	1
ERS1131825	ID108521	ID10852	ID108521	DZ	68	female	11/25/12	Visit	1
ERS1131819	ID107711	ID10771	ID107711	MZ	67	female	2013-04-02	Visit	1
ERS1131789	ID101911	ID10191	ID101911	MZ	57	female	1/27/13	Visit	1
ERS1131806	ID103692	ID10369	ID103692	MZ	55	female	1/28/13	Visit	1
ERS1131794	ID102431	ID10243	ID102431	DZ	67	female	2013-03-02	Visit	1
ERS1131786	ID101172	ID10117	ID101172	MZ	48	female	1/28/13	Visit	1
ERS1131788	ID101832	ID10183	ID101832	MZ	58	female	1/29/13	Visit	1
ERS1131805	ID103691	ID10369	ID103691	MZ	55	female	1/27/13	Visit	1
ERS1131814	ID105531	ID10553	ID105531	MZ	59	female	2013-04-02	Visit	1
ERS1131824	ID107751	ID10775	ID107751	DZ	63	female	1/23/13	Visit	1
ERS1131812	ID105081	ID10508	ID105081	MZ	57	female	1/20/13	Visit	1
ERS1131834	ID108862	ID10886	ID108862	DZ	63	female	2013-03-02	Visit	1
ERS1131823	ID107732	ID10773	ID107732	MZ	46	female	1/29/13	Visit	1
ERS1131830	ID108782	ID10878	ID108782	MZ	56	female	1/25/13	Visit	1
ERS1131813	ID105252	ID10525	ID105252	DZ	46	female	11/27/12	Visit	1
ERS1131803	ID103301	ID10330	ID103301	MZ	79	female	1/30/13	Visit	1
ERS1131821	ID107721	ID10772	ID107721	DZ	65	female	1/14/13	Visit	1
ERS1131848	ID113222	ID11322	ID113222	DZ	55	female	2013-11-01	Visit	1
ERS1131851	ID115301	ID11530	ID115301	MZ	76	female	2013-06-01	Postal	1
ERS1131853	ID115742	ID11574	ID115742	DZ	60	female	2013-06-01	Visit	1
ERS1131802	ID103292	ID10329	ID103292	MZ	66	female	1/23/13	Visit	1
ERS1131833	ID108861	ID10886	ID108861	DZ	63	female	2013-03-02	Visit	1
ERS1131801	ID103291	ID10329	ID103291	MZ	66	female	1/23/13	Visit	1
ERS1131843	ID111421	ID11142	ID111421	DZ	49	female	1/17/13	Postal	1
ERS1131781	ID100672	ID10067	ID100672	MZ	58	female	2013-01-02	Visit	1
ERS1131816	ID106232	ID10623	ID106232	DZ	66	female	1/28/13	Visit	1
ERS1131799	ID103191	ID10319	ID103191	MZ	66	female	1/24/13	Visit	1
ERS1131829	ID108781	ID10878	ID108781	MZ	56	female	1/24/13	Visit	1
ERS1131791	ID102021	ID10202	ID102021	MZ	67	female	2013-06-02	Visit	1
ERS1131919	ID112382	ID11238	ID112382	DZ	70	male	2013-11-02	Visit	1
ERS1131874	ID103221	ID10322	ID103221	DZ	57	female	2013-09-02	Visit	1
ERS1131858	ID100711	ID10071	ID100711	MZ	47	female	2/18/13	Visit	1
ERS1131917	ID112201	ID11220	ID112201	MZ	50	female	1/16/13	Visit	1
ERS1131889	ID106661	ID10666	ID106661	MZ	61	female	2/25/13	Visit	1
ERS1131864	ID101871	ID10187	ID101871	MZ	58	female	2/18/13	Visit	1
ERS1131875	ID103222	ID10322	ID103222	DZ	57	female	2013-10-02	Visit	1
ERS1131867	ID101982	ID10198	ID101982	MZ	62	female	2/13/13	Visit	1
ERS1131903	ID108921	ID10892	ID108921	MZ	58	female	2013-10-02	Visit	1
ERS1131879	ID103341	ID10334	ID103341	MZ	67	female	2/17/13	Visit	1
ERS1131880	ID103342	ID10334	ID103342	MZ	67	female	2/17/13	Visit	1
ERS1131855	ID100332	ID10033	ID100332	MZ	43	female	2/20/13	Visit	1
ERS1131877	ID103272	ID10327	ID103272	MZ	62	female	2/19/13	Visit	1
ERS1131896	ID108392	ID10839	ID108392	DZ	62	female	2/25/13	Postal	1
ERS1131894	ID107731	ID10773	ID107731	MZ	46	female	1/29/13	Visit	1
ERS1131868	ID101991	ID10199	ID101991	MZ	64	female	2013-03-02	Postal	1
ERS1131876	ID103271	ID10327	ID103271	MZ	62	female	2/18/13	Visit	1
ERS1131899	ID108801	ID10880	ID108801	MZ	58	female	3/30/13	Visit	1
ERS1131904	ID108922	ID10892	ID108922	MZ	58	female	2013-10-02	Visit	1
ERS1131898	ID108791	ID10879	ID108791	MZ	65	female	2013-09-01	Visit	1
ERS1131902	ID108882	ID10888	ID108882	DZ	68	female	2013-03-02	Visit	1
ERS1131856	ID100351	ID10035	ID100351	DZ	49	female	2/18/13	Visit	1
ERS1131886	ID106611	ID10661	ID106611	DZ	58	female	2013-07-02	Visit	1
ERS1131869	ID102001	ID10200	ID102001	DZ	60	female	2/21/13	Visit	1
ERS1131859	ID100712	ID10071	ID100712	MZ	47	female	2/17/13	Visit	1
ERS1131892	ID107091	ID10709	ID107091	MZ	58	female	2013-04-03	Postal	1
ERS1131916	ID111852	ID11185	ID111852	MZ	64	female	2/26/13	Visit	1
ERS1131857	ID100671	ID10067	ID100671	MZ	58	female	2/19/13	Postal	1
ERS1131871	ID102012	ID10201	ID102012	MZ	70	female	2013-09-02	Visit	1
ERS1131885	ID106231	ID10623	ID106231	DZ	66	female	1/22/13	Visit	1
ERS1131910	ID109921	ID10992	ID109921	MZ	67	female	2013-04-03	Postal	1
ERS1131870	ID102011	ID10201	ID102011	MZ	70	female	2013-09-02	Visit	1
ERS1131920	ID113431	ID11343	ID113431	DZ	35	female	2/14/13	Visit	1
ERS1131873	ID103202	ID10320	ID103202	MZ	70	female	1/17/13	Visit	1
ERS1131915	ID110972	ID11097	ID110972	DZ	48	female	2/28/13	Visit	1
ERS1131866	ID101981	ID10198	ID101981	MZ	62	female	2/13/13	Visit	1
ERS1131918	ID112381	ID11238	ID112381	DZ	70	male	2013-11-02	Visit	1
ERS1131863	ID100811	ID10081	ID100811	MZ	80	female	2013-10-01	Visit	1
ERS1131890	ID106662	ID10666	ID106662	MZ	61	female	2/24/13	Visit	1
ERS1131900	ID108821	ID10882	ID108821	DZ	65	female	1/14/13	Visit	1
ERS1131854	ID100331	ID10033	ID100331	MZ	43	female	2/19/13	Visit	1
ERS1131901	ID108881	ID10888	ID108881	DZ	68	female	2013-03-02	Visit	1
ERS1131884	ID105221	ID10522	ID105221	MZ	48	female	1/30/13	Postal	1
ERS1131923	ID100631	ID10063	ID100631	MZ	62	female	3/21/13	Visit	1
ERS1131944	ID105261	ID10526	ID105261	MZ	63	female	3/17/13	Visit	1
ERS1131952	ID107431	ID10743	ID107431	MZ	79	female	2/26/13	Postal	1
ERS1131950	ID107092	ID10709	ID107092	MZ	58	female	2/26/13	Postal	1
ERS1131949	ID106712	ID10671	ID106712	DZ	69	female	3/24/13	Postal	1
ERS1131987	ID115272	ID11527	ID115272	DZ	54	female	3/24/13	Postal	1
ERS1131948	ID106242	ID10624	ID106242	DZ	70	female	3/25/13	Postal	1
ERS1131937	ID103551	ID10355	ID103551	DZ	69	female	3/25/13	Postal	1
ERS1131980	ID114181	ID11418	ID114181	MZ	48	female	2013-11-03	Postal	1
ERS1131983	ID114722	ID11472	ID114722	DZ	65	female	3/19/13	Postal	1
ERS1131982	ID114382	ID11438	ID114382	MZ	74	female	3/13/13	Postal	1
ERS1131954	ID107782	ID10778	ID107782	MZ	63	female	3/25/13	Postal	1
ERS1131970	ID113231	ID11323	ID113231	MZ	64	female	3/18/13	Postal	1
ERS1131967	ID112242	ID11224	ID112242	DZ	65	female	2013-11-03	Postal	1
ERS1131957	ID109901	ID10990	ID109901	DZ	40	male	2013-05-03	Visit	1
ERS1131986	ID115122	ID11512	ID115122	MZ	59	female	2013-11-03	Postal	1
ERS1131951	ID107231	ID10723	ID107231	MZ	72	female	2/26/13	Postal	1
ERS1131945	ID105262	ID10526	ID105262	MZ	63	female	3/17/13	Visit	1
ERS1131966	ID111851	ID11185	ID111851	MZ	64	female	2/27/13	Visit	1
ERS1131930	ID101571	ID10157	ID101571	MZ	48	female	2013-06-03	Postal	1
ERS1131955	ID109881	ID10988	ID109881	DZ	61	female	3/19/13	Visit	1
ERS1131939	ID103801	ID10380	ID103801	MZ	58	female	3/25/13	Postal	1
ERS1131941	ID104852	ID10485	ID104852	MZ	63	female	2013-02-03	Postal	1
ERS1131943	ID105202	ID10520	ID105202	DZ	67	male	3/26/13	Postal	1
ERS1131972	ID114121	ID11412	ID114121	MZ	45	female	2013-05-03	Visit	1
ERS1131947	ID106211	ID10621	ID106211	MZ	82	female	3/25/13	Postal	1
ERS1131934	ID101872	ID10187	ID101872	MZ	58	female	2/17/13	Visit	1
ERS1131942	ID105201	ID10520	ID105201	DZ	67	male	3/18/13	Postal	1
ERS1131984	ID114741	ID11474	ID114741	MZ	60	female	2013-08-03	Visit	1
ERS1131988	ID115601	ID11560	ID115601	MZ	69	male	3/13/13	Visit	1
ERS1131960	ID110032	ID11003	ID110032	DZ	58	female	3/25/13	Postal	1
ERS1131924	ID100632	ID10063	ID100632	MZ	62	female	3/20/13	Visit	1
ERS1131981	ID114381	ID11438	ID114381	MZ	74	female	3/19/13	Postal	1
ERS1131969	ID112841	ID11284	ID112841	MZ	63	female	3/16/13	Postal	1
ERS1131971	ID113232	ID11323	ID113232	MZ	64	female	3/19/13	Postal	1
ERS1131953	ID107432	ID10743	ID107432	MZ	79	female	2/26/13	Postal	1
ERS1131922	ID100382	ID10038	ID100382	MZ	63	female	2013-05-03	Postal	1
ERS1131985	ID114742	ID11474	ID114742	MZ	60	female	2013-08-03	Visit	1
ERS1131933	ID101591	ID10159	ID101591	DZ	59	female	3/22/13	Visit	1
ERS1131935	ID103071	ID10307	ID103071	DZ	72	female	2/25/13	Postal	1
ERS1132038	ID113201	ID11320	ID113201	DZ	60	female	3/26/13	Postal	1
ERS1132034	ID110302	ID11030	ID110302	DZ	56	female	3/26/13	Postal	1
ERS1132053	ID115132	ID11513	ID115132	MZ	56	female	2013-10-04	Postal	1
ERS1132056	ID115361	ID11536	ID115361	DZ	70	male	3/26/13	Postal	1
ERS1132015	ID107621	ID10762	ID107621	MZ	57	female	3/25/13	Postal	1
ERS1132008	ID106181	ID10618	ID106181	MZ	54	female	2013-09-04	Postal	1
ERS1131990	ID100361	ID10036	ID100361	MZ	54	female	2013-02-04	Postal	1
ERS1131999	ID103522	ID10352	ID103522	MZ	68	female	2013-01-04	Postal	1
ERS1132050	ID114832	ID11483	ID114832	DZ	67	female	2013-02-04	Postal	1
ERS1132017	ID107762	ID10776	ID107762	DZ	70	female	2013-02-04	Postal	1
ERS1132009	ID106201	ID10620	ID106201	MZ	65	female	2013-02-04	Postal	1
ERS1132019	ID107781	ID10778	ID107781	MZ	63	female	2013-02-04	Postal	1
ERS1132000	ID103552	ID10355	ID103552	DZ	69	female	2013-02-04	Postal	1
ERS1132037	ID113191	ID11319	ID113191	MZ	38	female	2013-02-04	Postal	1
ERS1132046	ID114391	ID11439	ID114391	MZ	62	female	2013-01-04	Postal	1
ERS1132049	ID114641	ID11464	ID114641	MZ	47	female	2013-01-04	Postal	1
ERS1132016	ID107761	ID10776	ID107761	DZ	70	female	2013-02-04	Postal	1
ERS1132018	ID107771	ID10777	ID107771	MZ	76	female	2013-03-04	Postal	1
ERS1131996	ID102461	ID10246	ID102461	DZ	68	female	2013-03-03	Postal	1
ERS1132010	ID106212	ID10621	ID106212	MZ	82	female	3/26/13	Postal	1
ERS1132002	ID104592	ID10459	ID104592	DZ	58	female	2013-03-04	Postal	1
ERS1132052	ID114842	ID11484	ID114842	DZ	65	female	2013-03-04	Postal	1
ERS1132029	ID109062	ID10906	ID109062	DZ	69	female	3/26/13	Postal	1
ERS1132021	ID108502	ID10850	ID108502	DZ	70	female	3/26/13	Visit	1
ERS1132001	ID104461	ID10446	ID104461	DZ	71	female	2013-08-04	Postal	1
ERS1132042	ID113372	ID11337	ID113372	MZ	77	female	2013-08-04	Postal	1
ERS1132044	ID114092	ID11409	ID114092	DZ	76	female	2013-02-04	Postal	1
ERS1132047	ID114522	ID11452	ID114522	DZ	73	male	2013-10-04	Postal	1
ERS1131998	ID103521	ID10352	ID103521	MZ	68	female	2013-08-03	Postal	1
ERS1132030	ID109721	ID10972	ID109721	DZ	60	female	2013-08-04	Postal	1
ERS1132043	ID114091	ID11409	ID114091	DZ	76	female	2013-08-04	Postal	1
ERS1131991	ID100362	ID10036	ID100362	MZ	54	female	2013-08-04	Postal	1
ERS1131995	ID101961	ID10196	ID101961	MZ	63	female	3/26/13	Visit	1
ERS1132036	ID111201	ID11120	ID111201	MZ	71	female	2013-08-04	Postal	1
ERS1132005	ID105172	ID10517	ID105172	MZ	54	female	2013-10-04	Postal	1
ERS1132051	ID114841	ID11484	ID114841	DZ	65	female	2013-09-04	Postal	1
ERS1132013	ID106691	ID10669	ID106691	DZ	61	female	2013-08-04	Postal	1
ERS1132048	ID114551	ID11455	ID114551	DZ	67	female	2013-09-04	Postal	1
ERS1132039	ID113212	ID11321	ID113212	MZ	66	female	2013-09-04	Postal	1
ERS1132023	ID108771	ID10877	ID108771	DZ	67	female	2013-09-04	Postal	1
ERS1132022	ID108741	ID10874	ID108741	DZ	58	female	2013-08-04	Postal	1
ERS1132032	ID110291	ID11029	ID110291	DZ	61	female	2013-08-04	Postal	1
ERS1132020	ID107921	ID10792	ID107921	DZ	71	female	4/17/13	Postal	1
ERS1132040	ID113351	ID11335	ID113351	MZ	66	female	4/23/13	Postal	1
ERS1132041	ID113361	ID11336	ID113361	MZ	74	female	4/29/13	Postal	1
ERS1132100	ID115131	ID11513	ID115131	MZ	56	female	2013-10-04	Postal	1
ERS1132105	ID115651	ID11565	ID115651	MZ	76	male	4/14/13	Postal	1
ERS1132103	ID115362	ID11536	ID115362	DZ	70	male	2013-10-04	Postal	1
ERS1132058	ID100381	ID10038	ID100381	MZ	63	female	4/16/13	Postal	1
ERS1132101	ID115281	ID11528	ID115281	MZ	68	female	4/15/13	Postal	1
ERS1132069	ID103491	ID10349	ID103491	DZ	65	female	4/15/13	Postal	1
ERS1132085	ID109722	ID10972	ID109722	DZ	60	female	2013-09-04	Postal	1
ERS1132078	ID107632	ID10763	ID107632	MZ	56	female	4/15/13	Postal	1
ERS1132090	ID112391	ID11239	ID112391	DZ	57	female	4/17/13	Postal	1
ERS1132061	ID101881	ID10188	ID101881	MZ	66	female	4/17/13	Postal	1
ERS1132059	ID100912	ID10091	ID100912	MZ	55	female	3/26/13	Postal	1
ERS1132079	ID107681	ID10768	ID107681	DZ	68	female	4/14/13	Visit	1
ERS1132063	ID101901	ID10190	ID101901	MZ	54	female	2013-07-04	Postal	1
ERS1132076	ID107622	ID10762	ID107622	MZ	57	female	2013-03-04	Postal	1
ERS1132065	ID102061	ID10206	ID102061	DZ	69	female	2013-08-04	Postal	1
ERS1132088	ID112361	ID11236	ID112361	DZ	49	female	4/29/13	Postal	1
ERS1132081	ID107892	ID10789	ID107892	DZ	76	female	2013-08-04	Postal	1
ERS1132099	ID114831	ID11483	ID114831	DZ	67	female	2013-09-04	Postal	1
ERS1132102	ID115351	ID11535	ID115351	MZ	58	male	2013-03-04	Postal	1
ERS1132064	ID101902	ID10190	ID101902	MZ	54	female	2013-08-04	Postal	1
ERS1132062	ID101882	ID10188	ID101882	MZ	66	female	2013-01-05	Postal	1
ERS1132080	ID107682	ID10768	ID107682	DZ	68	female	4/14/13	Visit	1
ERS1132089	ID112371	ID11237	ID112371	MZ	61	female	4/21/13	Visit	1
ERS1132075	ID107102	ID10710	ID107102	MZ	40	female	4/21/13	Visit	1
ERS1132070	ID104451	ID10445	ID104451	MZ	60	female	4/21/13	Postal	1
ERS1132092	ID113381	ID11338	ID113381	MZ	71	female	4/26/13	Postal	1
ERS1132098	ID114542	ID11454	ID114542	DZ	68	male	4/21/13	Postal	1
ERS1132097	ID114521	ID11452	ID114521	DZ	73	male	2013-01-05	Postal	1
ERS1132095	ID113451	ID11345	ID113451	DZ	65	female	4/21/13	Visit	1
ERS1132077	ID107631	ID10763	ID107631	MZ	56	female	4/28/13	Postal	1
ERS1132091	ID112781	ID11278	ID112781	MZ	65	female	4/21/13	Postal	1
ERS1132104	ID115631	ID11563	ID115631	DZ	71	female	4/29/13	Postal	1
ERS1132074	ID106761	ID10676	ID106761	MZ	48	female	4/22/13	Postal	1
ERS1132141	ID111151	ID11115	ID111151	DZ	75	female	2013-12-05	Visit	1
ERS1132142	ID111181	ID11118	ID111181	MZ	69	female	5/16/13	Visit	1
ERS1132120	ID107101	ID10710	ID107101	MZ	41	female	5/13/13	Postal	1
ERS1132130	ID108541	ID10854	ID108541	MZ	67	female	2013-07-05	Postal	1
ERS1132164	ID115402	ID11540	ID115402	DZ	77	female	5/19/13	Visit	1
ERS1132163	ID115401	ID11540	ID115401	DZ	77	female	5/19/13	Visit	1
ERS1132138	ID109972	ID10997	ID109972	MZ	78	female	5/17/13	Visit	1
ERS1132137	ID109971	ID10997	ID109971	MZ	78	female	5/17/13	Visit	1
ERS1132131	ID108542	ID10854	ID108542	MZ	67	female	2013-07-05	Postal	1
ERS1132116	ID105691	ID10569	ID105691	DZ	49	female	5/21/13	Visit	1
ERS1132165	ID115412	ID11541	ID115412	MZ	73	female	5/20/13	Visit	1
ERS1132119	ID105761	ID10576	ID105761	MZ	72	female	5/21/13	Visit	1
ERS1132124	ID107552	ID10755	ID107552	DZ	60	male	5/23/13	Visit	1
ERS1132109	ID101451	ID10145	ID101451	DZ	63	male	5/28/13	Postal	1
ERS1132127	ID107701	ID10770	ID107701	DZ	58	female	5/29/13	Postal	1
ERS1132139	ID110001	ID11000	ID110001	MZ	81	female	5/31/13	Visit	1
ERS1132140	ID110971	ID11097	ID110971	DZ	48	female	5/27/13	Postal	1
ERS1132110	ID101452	ID10145	ID101452	DZ	63	male	2013-04-06	Postal	1
ERS1132161	ID115381	ID11538	ID115381	DZ	67	female	2013-08-06	Visit	1
ERS1132162	ID115382	ID11538	ID115382	DZ	67	female	2013-09-06	Visit	1
ERS1132135	ID108661	ID10866	ID108661	DZ	61	female	2013-07-06	Visit	1
ERS1132134	ID108651	ID10865	ID108651	DZ	66	female	2013-10-06	Visit	1
ERS1132156	ID114441	ID11444	ID114441	DZ	68	female	2013-11-06	Visit	1
ERS1132157	ID114442	ID11444	ID114442	DZ	68	female	2013-11-06	Visit	1
ERS1132132	ID108561	ID10856	ID108561	MZ	74	female	2013-10-06	Visit	1
ERS1132133	ID108562	ID10856	ID108562	MZ	74	female	2013-10-06	Visit	1
ERS1132168	ID115442	ID11544	ID115442	MZ	71	female	2013-11-06	Visit	1
ERS1132167	ID115441	ID11544	ID115441	MZ	71	female	2013-11-06	Visit	1
ERS1132166	ID115431	ID11543	ID115431	DZ	55	female	6/13/13	Visit	1
ERS1132117	ID105751	ID10575	ID105751	DZ	64	female	2013-12-06	Visit	1
ERS1132118	ID105752	ID10575	ID105752	DZ	64	female	6/13/13	Visit	1
ERS1132169	ID115461	ID11546	ID115461	MZ	80	female	6/14/13	Visit	1
ERS1132170	ID115462	ID11546	ID115462	MZ	80	female	6/13/13	Visit	1
ERS1132172	ID115502	ID11550	ID115502	MZ	71	female	6/13/13	Visit	1
ERS1132171	ID115501	ID11550	ID115501	MZ	71	female	2013-12-06	Visit	1
ERS1132188	ID104301	ID10430	ID104301	MZ	60	female	6/19/13	Visit	1
ERS1132223	ID110901	ID11090	ID110901	DZ	60	female	6/20/13	Visit	1
ERS1132224	ID110902	ID11090	ID110902	DZ	60	female	6/20/13	Visit	1
ERS1132243	ID114431	ID11443	ID114431	DZ	64	female	6/20/13	Visit	1
ERS1132244	ID114432	ID11443	ID114432	DZ	64	female	6/18/13	Visit	1
ERS1132226	ID110922	ID11092	ID110922	MZ	69	female	6/17/13	Visit	1
ERS1132213	ID109821	ID10982	ID109821	DZ	63	female	6/18/13	Visit	1
ERS1132198	ID108571	ID10857	ID108571	DZ	70	female	6/21/13	Visit	1
ERS1132199	ID108572	ID10857	ID108572	DZ	70	female	6/24/13	Visit	1
ERS1132215	ID109832	ID10983	ID109832	DZ	66	female	6/23/13	Visit	1
ERS1132214	ID109831	ID10983	ID109831	DZ	66	female	6/24/13	Visit	1
ERS1132230	ID110942	ID11094	ID110942	MZ	75	female	6/25/13	Visit	1
ERS1132229	ID110941	ID11094	ID110941	MZ	75	female	6/25/13	Visit	1
ERS1132210	ID109782	ID10978	ID109782	DZ	69	female	6/22/13	Visit	1
ERS1132225	ID110921	ID11092	ID110921	MZ	69	female	6/16/13	Visit	1
ERS1132209	ID109781	ID10978	ID109781	DZ	69	female	6/22/13	Visit	1
ERS1132247	ID115392	ID11539	ID115392	MZ	71	female	6/23/13	Visit	1
ERS1132246	ID115391	ID11539	ID115391	MZ	71	female	6/23/13	Visit	1
ERS1132181	ID101491	ID10149	ID101491	MZ	47	female	6/25/13	Postal	1
ERS1132183	ID102671	ID10267	ID102671	DZ	38	female	6/28/13	Visit	1
ERS1132249	ID115452	ID11545	ID115452	DZ	74	female	6/25/13	Visit	1
ERS1132251	ID115472	ID11547	ID115472	DZ	62	female	6/22/13	Visit	1
ERS1132241	ID114421	ID11442	ID114421	DZ	62	female	6/26/13	Visit	1
ERS1132248	ID115451	ID11545	ID115451	DZ	74	female	6/25/13	Visit	1
ERS1132197	ID108552	ID10855	ID108552	DZ	59	female	6/30/13	Visit	1
ERS1132195	ID108482	ID10848	ID108482	MZ	67	female	6/26/13	Visit	1
ERS1132227	ID110931	ID11093	ID110931	DZ	65	female	6/25/13	Visit	1
ERS1132211	ID109791	ID10979	ID109791	DZ	61	female	6/29/13	Visit	1
ERS1132252	ID115701	ID11570	ID115701	MZ	63	female	6/26/13	Visit	1
ERS1132194	ID108481	ID10848	ID108481	MZ	67	female	6/27/13	Visit	1
ERS1132212	ID109792	ID10979	ID109792	DZ	61	female	6/29/13	Visit	1
ERS1132191	ID104632	ID10463	ID104632	DZ	60	female	6/24/13	Visit	1
ERS1132253	ID115702	ID11570	ID115702	MZ	63	female	6/26/13	Visit	1
ERS1132221	ID110841	ID11084	ID110841	MZ	68	female	6/27/13	Visit	1
ERS1132219	ID110831	ID11083	ID110831	MZ	59	female	6/14/13	Visit	1
ERS1132228	ID110932	ID11093	ID110932	DZ	65	female	6/26/13	Visit	1
ERS1132222	ID110842	ID11084	ID110842	MZ	68	female	6/27/13	Visit	1
ERS1132185	ID102691	ID10269	ID102691	DZ	62	male	2013-01-07	Visit	1
ERS1132178	ID101461	ID10146	ID101461	DZ	67	female	2013-02-07	Visit	1
ERS1132179	ID101462	ID10146	ID101462	DZ	67	female	2013-01-07	Visit	1
ERS1132216	ID110101	ID11010	ID110101	MZ	63	female	2013-02-07	Visit	1
ERS1132220	ID110832	ID11083	ID110832	MZ	59	female	6/16/13	Visit	1
ERS1132201	ID108642	ID10864	ID108642	DZ	71	female	2013-08-07	Visit	1
ERS1132200	ID108641	ID10864	ID108641	DZ	71	female	2013-08-07	Visit	1
ERS1132189	ID104331	ID10433	ID104331	DZ	49	female	2013-11-07	Visit	1
ERS1132180	ID101471	ID10147	ID101471	DZ	41	female	2013-12-07	Visit	1
ERS1132204	ID109582	ID10958	ID109582	MZ	82	female	7/14/13	Visit	1
ERS1132203	ID109581	ID10958	ID109581	MZ	82	female	7/14/13	Visit	1
ERS1132233	ID111541	ID11154	ID111541	DZ	65	female	7/15/13	Visit	1
ERS1132192	ID106401	ID10640	ID106401	DZ	52	female	7/17/13	Visit	1
ERS1132193	ID106402	ID10640	ID106402	DZ	52	female	7/17/13	Visit	1
ERS1132232	ID111232	ID11123	ID111232	MZ	54	female	7/16/13	Visit	1
ERS1132231	ID111231	ID11123	ID111231	MZ	54	female	7/16/13	Visit	1
ERS1132265	ID103162	ID10316	ID103162	MZ	37	female	7/17/13	Visit	1
ERS1132298	ID111262	ID11126	ID111262	MZ	61	female	7/22/13	Visit	1
ERS1132272	ID105161	ID10516	ID105161	MZ	66	female	7/23/13	Visit	1
ERS1132285	ID109811	ID10981	ID109811	DZ	68	female	7/29/13	Visit	1
ERS1132266	ID104031	ID10403	ID104031	DZ	44	female	7/26/13	Visit	1
ERS1132277	ID106481	ID10648	ID106481	MZ	68	female	8/27/13	Visit	1
ERS1132270	ID104442	ID10444	ID104442	MZ	68	female	8/22/13	Visit	1
ERS1132293	ID110892	ID11089	ID110892	MZ	67	female	7/30/13	Visit	1
ERS1132283	ID108722	ID10872	ID108722	DZ	65	female	7/29/13	Visit	1
ERS1132275	ID106451	ID10645	ID106451	MZ	56	female	2013-11-08	Visit	1
ERS1132279	ID107961	ID10796	ID107961	DZ	56	female	8/13/13	Postal	1
ERS1132299	ID112141	ID11214	ID112141	MZ	50	female	2013-11-08	Visit	1
ERS1132259	ID101781	ID10178	ID101781	DZ	60	female	2013-07-08	Postal	1
ERS1132287	ID110122	ID11012	ID110122	DZ	61	male	7/21/13	Visit	1
ERS1132255	ID100561	ID10056	ID100561	DZ	74	female	8/13/13	Postal	1
ERS1132300	ID112142	ID11214	ID112142	MZ	50	female	2013-12-08	Visit	1
ERS1132260	ID101792	ID10179	ID101792	MZ	56	female	8/13/13	Visit	1
ERS1132256	ID100562	ID10056	ID100562	DZ	74	female	8/13/13	Postal	1
ERS1132291	ID110721	ID11072	ID110721	MZ	74	female	7/20/13	Visit	1
ERS1132269	ID104381	ID10438	ID104381	MZ	53	female	2013-05-08	Postal	1
ERS1132271	ID104502	ID10450	ID104502	DZ	42	female	8/15/13	Visit	1
ERS1132327	ID104032	ID10403	ID104032	DZ	44	female	7/25/13	Visit	1
ERS1132322	ID103171	ID10317	ID103171	DZ	34	female	7/30/13	Postal	1
ERS1132345	ID106571	ID10657	ID106571	MZ	71	female	2013-02-08	Visit	1
ERS1132342	ID106482	ID10648	ID106482	MZ	68	female	8/27/13	Visit	1
ERS1132361	ID108611	ID10861	ID108611	DZ	65	male	7/18/13	Postal	1
ERS1132311	ID102732	ID10273	ID102732	DZ	66	male	7/28/13	Visit	1
ERS1132346	ID106572	ID10657	ID106572	MZ	71	female	2013-03-08	Visit	1
ERS1132368	ID110771	ID11077	ID110771	MZ	70	female	2013-02-08	Visit	1
ERS1132369	ID110891	ID11089	ID110891	MZ	67	female	7/30/13	Visit	1
ERS1132333	ID104631	ID10463	ID104631	DZ	60	female	6/23/13	Visit	1
ERS1132332	ID104441	ID10444	ID104441	MZ	68	female	8/22/13	Visit	1
ERS1132339	ID106272	ID10627	ID106272	MZ	79	female	2013-04-08	Visit	1
ERS1132336	ID105291	ID10529	ID105291	DZ	61	female	10/24/13	Visit	1
ERS1132362	ID109741	ID10974	ID109741	DZ	69	female	10/22/13	Visit	1
ERS1132355	ID107442	ID10744	ID107442	MZ	48	female	10/27/13	Visit	1
ERS1132303	ID100582	ID10058	ID100582	MZ	61	female	10/24/13	Visit	1
ERS1132349	ID107131	ID10713	ID107131	DZ	56	female	2013-11-09	Visit	1
ERS1132335	ID105121	ID10512	ID105121	DZ	55	female	8/27/13	Visit	1
ERS1132341	ID106431	ID10643	ID106431	MZ	67	female	2013-12-09	Visit	1
ERS1132360	ID108442	ID10844	ID108442	MZ	62	female	10/29/13	Visit	1
ERS1132334	ID105102	ID10510	ID105102	MZ	33	female	10/30/13	Visit	1
ERS1132372	ID111872	ID11187	ID111872	DZ	57	male	2013-08-10	Visit	1
ERS1132381	ID115572	ID11557	ID115572	MZ	68	female	2013-06-10	Visit	1
ERS1132307	ID101642	ID10164	ID101642	MZ	52	female	8/31/13	Visit	1
ERS1132306	ID101641	ID10164	ID101641	MZ	52	female	8/31/13	Visit	1
ERS1132329	ID104171	ID10417	ID104171	MZ	73	female	2013-02-09	Visit	1
ERS1132376	ID114342	ID11434	ID114342	DZ	63	female	2013-03-09	Visit	1
ERS1132375	ID114341	ID11434	ID114341	DZ	63	female	2013-03-09	Visit	1
ERS1132313	ID102822	ID10282	ID102822	DZ	55	male	2013-03-09	Visit	1
ERS1132338	ID105802	ID10580	ID105802	DZ	66	female	8/20/13	Postal	1
ERS1132325	ID103421	ID10342	ID103421	DZ	74	female	2013-04-08	Postal	1
ERS1132305	ID101511	ID10151	ID101511	MZ	71	female	2013-05-09	Visit	1
ERS1132315	ID102862	ID10286	ID102862	DZ	47	male	2013-11-09	Visit	1
ERS1132365	ID109841	ID10984	ID109841	DZ	56	female	10/23/13	Visit	1
ERS1132373	ID112811	ID11281	ID112811	MZ	74	female	2013-09-09	Visit	1
ERS1132340	ID106381	ID10638	ID106381	DZ	69	female	2013-07-09	Visit	1
ERS1132323	ID103371	ID10337	ID103371	MZ	65	female	10/20/13	Visit	1
ERS1132363	ID109742	ID10974	ID109742	DZ	69	female	10/21/13	Visit	1
ERS1132367	ID110171	ID11017	ID110171	MZ	42	female	10/23/13	Visit	1
ERS1132324	ID103372	ID10337	ID103372	MZ	65	female	10/20/13	Visit	1
ERS1132356	ID107481	ID10748	ID107481	DZ	69	male	2013-09-09	Postal	1
ERS1132350	ID107132	ID10713	ID107132	DZ	56	female	2013-11-09	Visit	1
ERS1132304	ID100752	ID10075	ID100752	MZ	79	female	2013-11-09	Visit	1
ERS1132309	ID102722	ID10272	ID102722	DZ	44	female	9/13/13	Visit	1
ERS1132308	ID102721	ID10272	ID102721	DZ	44	female	2013-11-09	Visit	1
ERS1132310	ID102731	ID10273	ID102731	DZ	66	male	7/29/13	Visit	1
ERS1132343	ID106521	ID10652	ID106521	MZ	57	female	9/18/13	Visit	1
ERS1132344	ID106522	ID10652	ID106522	MZ	57	female	9/18/13	Visit	1
ERS1132353	ID107331	ID10733	ID107331	MZ	81	female	9/17/13	Visit	1
ERS1132418	ID106491	ID10649	ID106491	MZ	58	female	9/20/13	Visit	1
ERS1132419	ID106492	ID10649	ID106492	MZ	58	female	9/20/13	Visit	1
ERS1132398	ID101942	ID10194	ID101942	MZ	66	female	9/21/13	Visit	1
ERS1132397	ID101941	ID10194	ID101941	MZ	66	female	9/23/13	Visit	1
ERS1132431	ID108702	ID10870	ID108702	DZ	75	female	9/21/13	Visit	1
ERS1132430	ID108701	ID10870	ID108701	DZ	75	female	9/23/13	Visit	1
ERS1132417	ID106391	ID10639	ID106391	MZ	65	female	9/24/13	Visit	1
ERS1132447	ID114311	ID11431	ID114311	MZ	72	female	10/30/13	Visit	1
ERS1132440	ID112101	ID11210	ID112101	MZ	64	female	9/29/13	Visit	1
ERS1132441	ID112102	ID11210	ID112102	MZ	64	female	9/29/13	Visit	1
ERS1132425	ID107471	ID10747	ID107471	MZ	81	female	9/30/13	Visit	1
ERS1132433	ID110061	ID11006	ID110061	MZ	73	female	2013-01-10	Postal	1
ERS1132411	ID105182	ID10518	ID105182	MZ	69	female	2013-07-10	Postal	1
ERS1132429	ID108672	ID10867	ID108672	MZ	52	female	2013-03-10	Visit	1
ERS1132389	ID100541	ID10054	ID100541	MZ	54	female	2013-03-10	Visit	1
ERS1132410	ID105181	ID10518	ID105181	MZ	69	female	2013-03-10	Visit	1
ERS1132428	ID108671	ID10867	ID108671	MZ	52	female	2013-03-10	Visit	1
ERS1132436	ID111871	ID11187	ID111871	DZ	57	male	2013-07-10	Visit	1
ERS1132407	ID104072	ID10407	ID104072	DZ	61	female	9/18/13	Visit	1
ERS1132445	ID114261	ID11426	ID114261	MZ	61	female	2013-09-10	Visit	1
ERS1132390	ID100581	ID10058	ID100581	MZ	61	female	10/24/13	Visit	1
ERS1132446	ID114262	ID11426	ID114262	MZ	61	female	2013-09-10	Visit	1
ERS1132435	ID111692	ID11169	ID111692	MZ	77	female	2013-07-10	Visit	1
ERS1132434	ID111691	ID11169	ID111691	MZ	77	female	2013-07-10	Visit	1
ERS1132409	ID104372	ID10437	ID104372	DZ	78	female	2013-06-10	Visit	1
ERS1132406	ID104071	ID10407	ID104071	DZ	61	female	9/17/13	Visit	1
ERS1132450	ID115571	ID11557	ID115571	MZ	68	female	2013-07-10	Visit	1
ERS1132408	ID104371	ID10437	ID104371	DZ	78	female	2013-05-10	Visit	1
ERS1132416	ID106361	ID10636	ID106361	MZ	69	female	2013-12-10	Visit	1
ERS1132413	ID105621	ID10562	ID105621	DZ	70	female	10/14/13	Visit	1
ERS1132399	ID102801	ID10280	ID102801	MZ	58	male	10/13/13	Postal	1
ERS1132403	ID103811	ID10381	ID103811	MZ	71	female	2013-10-10	Postal	1
ERS1132404	ID103812	ID10381	ID103812	MZ	71	female	2013-09-10	Postal	1
ERS1132432	ID109771	ID10977	ID109771	DZ	69	female	10/15/13	Visit	1
ERS1132439	ID112071	ID11207	ID112071	DZ	74	female	10/16/13	Visit	1
ERS1132420	ID106981	ID10698	ID106981	MZ	59	female	10/16/13	Postal	1
ERS1132391	ID100751	ID10075	ID100751	MZ	79	female	9/19/13	Postal	1
ERS1132482	ID106332	ID10633	ID106332	MZ	63	female	10/28/13	Visit	1
ERS1132468	ID104702	ID10470	ID104702	DZ	72	female	10/30/13	Postal	1
ERS1132529	ID114491	ID11449	ID114491	DZ	59	female	10/28/13	Visit	1
ERS1132504	ID109842	ID10984	ID109842	DZ	56	female	10/30/13	Postal	1
ERS1132474	ID105292	ID10529	ID105292	DZ	61	female	10/24/13	Visit	1
ERS1132469	ID105101	ID10510	ID105101	MZ	33	female	10/27/13	Visit	1
ERS1132483	ID106382	ID10638	ID106382	DZ	69	female	2013-08-09	Visit	1
ERS1132488	ID107482	ID10748	ID107482	DZ	69	male	2013-09-09	Postal	1
ERS1132462	ID103172	ID10317	ID103172	DZ	34	female	10/22/13	Postal	1
ERS1132486	ID107282	ID10728	ID107282	MZ	68	female	10/27/13	Postal	1
ERS1132461	ID101761	ID10176	ID101761	DZ	57	female	10/30/13	Postal	1
ERS1132476	ID105681	ID10568	ID105681	DZ	56	female	10/23/13	Visit	1
ERS1132492	ID108441	ID10844	ID108441	MZ	62	female	10/29/13	Visit	1
ERS1132487	ID107441	ID10744	ID107441	MZ	48	female	10/27/13	Visit	1
ERS1132485	ID107281	ID10728	ID107281	MZ	68	female	10/27/13	Postal	1
ERS1132455	ID100681	ID10068	ID100681	DZ	75	female	2013-01-11	Postal	1
ERS1132472	ID105191	ID10519	ID105191	MZ	72	female	2013-04-11	Visit	1
ERS1132473	ID105192	ID10519	ID105192	MZ	72	female	2013-04-11	Visit	1
ERS1132534	ID115872	ID11587	ID115872	MZ	52	male	10/30/13	Visit	1
ERS1132477	ID105682	ID10568	ID105682	DZ	56	female	10/28/13	Postal	1
ERS1132532	ID115652	ID11565	ID115652	MZ	77	male	2013-05-11	Postal	1
ERS1132502	ID109761	ID10976	ID109761	MZ	46	female	2013-01-11	Visit	1
ERS1132503	ID109762	ID10976	ID109762	MZ	46	female	2013-03-11	Visit	1
ERS1132467	ID104701	ID10470	ID104701	DZ	72	female	10/28/13	Postal	1
ERS1132460	ID101752	ID10175	ID101752	MZ	67	female	2013-04-11	Visit	1
ERS1132459	ID101751	ID10175	ID101751	MZ	67	female	2013-05-11	Visit	1
ERS1132466	ID104692	ID10469	ID104692	MZ	64	female	10/27/13	Visit	1
ERS1132471	ID105142	ID10514	ID105142	MZ	66	female	2013-07-11	Visit	1
ERS1132470	ID105141	ID10514	ID105141	MZ	66	female	2013-07-11	Visit	1
ERS1132458	ID101691	ID10169	ID101691	MZ	58	female	2013-08-11	Visit	1
ERS1132494	ID109291	ID10929	ID109291	DZ	67	female	2013-10-11	Visit	1
ERS1132495	ID109292	ID10929	ID109292	DZ	67	female	2013-10-11	Visit	1
ERS1132465	ID104691	ID10469	ID104691	MZ	64	female	10/27/13	Visit	1
ERS1132511	ID111331	ID11133	ID111331	DZ	75	female	2013-11-11	Visit	1
ERS1132512	ID111332	ID11133	ID111332	DZ	75	female	2013-11-11	Visit	1
ERS1132513	ID111631	ID11163	ID111631	DZ	51	female	2013-09-11	Postal	1
ERS1132538	ID100501	ID10050	ID100501	DZ	67	female	2013-12-11	Visit	1
ERS1132574	ID106351	ID10635	ID106351	DZ	63	male	11/14/13	Visit	1
ERS1132582	ID108601	ID10860	ID108601	DZ	57	female	11/15/13	Visit	1
ERS1132555	ID102782	ID10278	ID102782	DZ	71	female	11/18/13	Visit	1
ERS1132554	ID102781	ID10278	ID102781	DZ	71	female	11/17/13	Visit	1
ERS1132552	ID102662	ID10266	ID102662	MZ	55	male	11/18/13	Visit	1
ERS1132612	ID115562	ID11556	ID115562	MZ	66	female	11/17/13	Visit	1
ERS1132611	ID115561	ID11556	ID115561	MZ	66	female	11/17/13	Visit	1
ERS1132541	ID100552	ID10055	ID100552	DZ	50	female	11/19/13	Visit	1
ERS1132540	ID100551	ID10055	ID100551	DZ	50	female	11/19/13	Visit	1
ERS1132608	ID114731	ID11473	ID114731	DZ	66	female	11/19/13	Postal	1
ERS1132557	ID103031	ID10303	ID103031	DZ	70	female	11/13/13	Visit	1
ERS1132610	ID114912	ID11491	ID114912	DZ	75	female	11/20/13	Visit	1
ERS1132609	ID114911	ID11491	ID114911	DZ	75	female	11/20/13	Visit	1
ERS1132571	ID105671	ID10567	ID105671	DZ	56	female	11/20/13	Visit	1
ERS1132572	ID105672	ID10567	ID105672	DZ	56	female	11/20/13	Visit	1
ERS1132558	ID103032	ID10303	ID103032	DZ	70	female	2013-12-11	Visit	1
ERS1132536	ID100252	ID10025	ID100252	MZ	67	female	11/20/13	Visit	1
ERS1132535	ID100251	ID10025	ID100251	MZ	67	female	11/21/13	Visit	1
ERS1132546	ID101771	ID10177	ID101771	DZ	63	female	11/21/13	Visit	1
ERS1132547	ID101772	ID10177	ID101772	DZ	63	female	11/21/13	Visit	1
ERS1132567	ID105361	ID10536	ID105361	DZ	54	female	11/21/13	Visit	1
ERS1132568	ID105362	ID10536	ID105362	DZ	54	female	11/19/13	Visit	1
ERS1132591	ID111812	ID11181	ID111812	MZ	55	female	11/22/13	Visit	1
ERS1132590	ID111811	ID11181	ID111811	MZ	55	female	11/21/13	Visit	1
ERS1132593	ID112122	ID11212	ID112122	MZ	49	female	11/21/13	Visit	1
ERS1132592	ID112121	ID11212	ID112121	MZ	49	female	11/21/13	Visit	1
ERS1132581	ID108592	ID10859	ID108592	DZ	54	female	11/22/13	Visit	1
ERS1132580	ID108591	ID10859	ID108591	DZ	54	female	11/23/13	Visit	1
ERS1132604	ID114201	ID11420	ID114201	MZ	42	female	11/24/13	Visit	1
ERS1132605	ID114202	ID11420	ID114202	MZ	42	female	11/24/13	Visit	1
ERS1132563	ID103441	ID10344	ID103441	MZ	60	female	11/25/13	Visit	1
ERS1132564	ID103442	ID10344	ID103442	MZ	60	female	11/25/13	Visit	1
ERS1132573	ID106341	ID10634	ID106341	DZ	53	female	11/22/13	Postal	1
ERS1132578	ID107412	ID10741	ID107412	MZ	69	female	11/25/13	Visit	1
ERS1132577	ID107411	ID10741	ID107411	MZ	69	female	11/26/13	Visit	1
ERS1132589	ID110822	ID11082	ID110822	DZ	60	female	11/27/13	Visit	1
ERS1132588	ID110821	ID11082	ID110821	DZ	60	female	11/25/13	Visit	1
ERS1132607	ID114582	ID11458	ID114582	MZ	59	female	11/28/13	Visit	1
ERS1132606	ID114581	ID11458	ID114581	MZ	59	female	11/28/13	Visit	1
ERS1132550	ID101922	ID10192	ID101922	MZ	73	female	11/28/13	Visit	1
ERS1132549	ID101921	ID10192	ID101921	MZ	73	female	11/27/13	Visit	1
ERS1132565	ID104411	ID10441	ID104411	MZ	59	female	11/28/13	Visit	1
ERS1132539	ID100502	ID10050	ID100502	DZ	67	female	11/13/13	Visit	1
ERS1132566	ID104412	ID10441	ID104412	MZ	59	female	11/28/13	Visit	1
ERS1132543	ID101442	ID10144	ID101442	MZ	42	female	11/28/13	Visit	1
ERS1132537	ID100271	ID10027	ID100271	DZ	64	female	11/29/13	Visit	1
ERS1132619	ID102742	ID10274	ID102742	MZ	45	female	2013-11-12	Visit	1
ERS1132654	ID115511	ID11551	ID115511	MZ	66	female	2013-10-12	Visit	1
ERS1132655	ID115512	ID11551	ID115512	MZ	66	female	2013-09-12	Visit	1
ERS1132625	ID105131	ID10513	ID105131	DZ	72	male	2013-10-12	Visit	1
ERS1132648	ID114411	ID11441	ID114411	DZ	53	female	2013-12-12	Visit	1
ERS1132630	ID109752	ID10975	ID109752	MZ	49	female	12/17/13	Visit	1
ERS1132629	ID109751	ID10975	ID109751	MZ	49	female	12/17/13	Visit	1
ERS1132624	ID105091	ID10509	ID105091	DZ	56	female	12/18/13	Postal	1
ERS1132640	ID113151	ID11315	ID113151	MZ	53	female	2014-02-01	Visit	1
ERS1132641	ID113152	ID11315	ID113152	MZ	53	female	2014-03-01	Visit	1
ERS1132653	ID115491	ID11549	ID115491	DZ	64	female	2014-05-01	Visit	1
ERS1132623	ID104091	ID10409	ID104091	MZ	59	female	2014-08-01	Visit	1
ERS1132618	ID102741	ID10274	ID102741	MZ	45	female	2013-11-12	Visit	1
ERS1132658	ID100272	ID10027	ID100272	DZ	64	female	11/29/13	Visit	1
ERS1132677	ID104181	ID10418	ID104181	DZ	40	female	2013-02-12	Visit	1
ERS1132732	ID114211	ID11421	ID114211	DZ	69	female	2013-02-12	Visit	1
ERS1132733	ID114212	ID11421	ID114212	DZ	69	female	11/30/13	Visit	1
ERS1132690	ID106342	ID10634	ID106342	DZ	53	female	2013-03-12	Postal	1
ERS1132738	ID114501	ID11450	ID114501	MZ	61	female	2013-03-12	Visit	1
ERS1132739	ID114502	ID11450	ID114502	MZ	61	female	2013-04-12	Visit	1
ERS1132720	ID113081	ID11308	ID113081	DZ	71	female	11/28/13	Visit	1
ERS1132691	ID106411	ID10641	ID106411	DZ	66	female	2013-04-12	Visit	1
ERS1132692	ID106412	ID10641	ID106412	DZ	66	female	2013-05-12	Visit	1
ERS1132666	ID100882	ID10088	ID100882	DZ	66	female	2013-04-12	Visit	1
ERS1132719	ID113072	ID11307	ID113072	DZ	66	female	2013-03-12	Visit	1
ERS1132718	ID113071	ID11307	ID113071	DZ	66	female	2013-03-12	Visit	1
ERS1132681	ID104431	ID10443	ID104431	MZ	46	female	11/30/13	Visit	1
ERS1132682	ID104432	ID10443	ID104432	MZ	46	female	11/29/13	Visit	1
ERS1132721	ID113082	ID11308	ID113082	DZ	71	female	11/29/13	Visit	1
ERS1132731	ID114192	ID11419	ID114192	MZ	59	female	2013-09-12	Visit	1
ERS1132730	ID114191	ID11419	ID114191	MZ	59	female	2013-08-12	Visit	1
ERS1132669	ID101712	ID10171	ID101712	DZ	62	female	2014-12-01	Visit	1
ERS1132668	ID101711	ID10171	ID101711	DZ	62	female	1/13/14	Visit	1
ERS1132697	ID109932	ID10993	ID109932	DZ	56	female	1/14/14	Visit	1
ERS1132696	ID109931	ID10993	ID109931	DZ	56	female	1/14/14	Visit	1
ERS1132698	ID109941	ID10994	ID109941	DZ	54	female	12/29/13	Postal	1
ERS1132703	ID112131	ID11213	ID112131	MZ	59	female	1/16/14	Visit	1
ERS1132704	ID112132	ID11213	ID112132	MZ	59	female	1/16/14	Visit	1
ERS1132695	ID107301	ID10730	ID107301	MZ	75	female	1/15/14	Visit	1
ERS1132667	ID101701	ID10170	ID101701	DZ	60	female	1/29/14	Visit	1
ERS1132683	ID104462	ID10446	ID104462	DZ	71	female	2014-06-02	Postal	1
ERS1132693	ID106791	ID10679	ID106791	DZ	63	female	2014-06-02	Visit	1
ERS1132694	ID106792	ID10679	ID106792	DZ	63	female	2014-08-02	Visit	1
ERS1132714	ID112472	ID11247	ID112472	DZ	66	female	2014-10-02	Visit	1
ERS1132713	ID112471	ID11247	ID112471	DZ	66	female	2014-09-02	Visit	1
ERS1132676	ID104151	ID10415	ID104151	MZ	71	male	2014-12-02	Visit	1
ERS1132687	ID105631	ID10563	ID105631	DZ	64	female	2/13/14	Visit	1
ERS1132686	ID105422	ID10542	ID105422	MZ	54	female	2/16/14	Visit	1
ERS1132685	ID105421	ID10542	ID105421	MZ	54	female	2/17/14	Visit	1
ERS1132757	ID102811	ID10281	ID102811	DZ	59	female	2/18/14	Visit	1
ERS1132758	ID102812	ID10281	ID102812	DZ	59	female	2/18/14	Visit	1
ERS1132769	ID104401	ID10440	ID104401	DZ	55	female	2/20/14	Visit	1
ERS1132770	ID104402	ID10440	ID104402	DZ	55	female	2/20/14	Visit	1
ERS1132742	ID100981	ID10098	ID100981	DZ	67	female	2/23/14	Visit	1
ERS1132771	ID104491	ID10449	ID104491	MZ	41	female	2/24/14	Visit	1
ERS1132792	ID110981	ID11098	ID110981	DZ	62	male	2/26/14	Visit	1
ERS1132750	ID101661	ID10166	ID101661	MZ	47	female	2/23/14	Visit	1
ERS1132751	ID101662	ID10166	ID101662	MZ	47	female	2/24/14	Visit	1
ERS1132778	ID106441	ID10644	ID106441	MZ	78	female	2/25/14	Visit	1
ERS1132779	ID106442	ID10644	ID106442	MZ	78	female	2/22/14	Visit	1
ERS1132756	ID102682	ID10268	ID102682	DZ	68	male	2/26/14	Visit	1
ERS1132755	ID102681	ID10268	ID102681	DZ	68	male	2/25/14	Visit	1
ERS1132773	ID104712	ID10471	ID104712	DZ	60	female	2/28/14	Visit	1
ERS1132772	ID104711	ID10471	ID104711	DZ	60	female	2/27/14	Visit	1
ERS1132777	ID106421	ID10642	ID106421	MZ	62	female	2/26/14	Postal	1
ERS1132760	ID102852	ID10285	ID102852	DZ	69	female	2014-04-03	Visit	1
ERS1132759	ID102851	ID10285	ID102851	DZ	69	female	2014-04-03	Visit	1
ERS1132791	ID110882	ID11088	ID110882	DZ	67	female	2014-05-03	Visit	1
ERS1132766	ID104342	ID10434	ID104342	MZ	77	female	2/19/14	Visit	1
ERS1132790	ID110881	ID11088	ID110881	DZ	67	female	2014-04-03	Visit	1
ERS1132748	ID101151	ID10115	ID101151	DZ	60	female	2014-06-03	Visit	1
ERS1132813	ID114461	ID11446	ID114461	MZ	58	female	2014-06-03	Visit	1
ERS1132749	ID101152	ID10115	ID101152	DZ	60	female	2014-07-03	Visit	1
ERS1132814	ID114462	ID11446	ID114462	MZ	58	female	2014-05-03	Visit	1
ERS1132765	ID104341	ID10434	ID104341	MZ	77	female	2/19/14	Visit	1
ERS1132741	ID100491	ID10049	ID100491	MZ	62	female	2014-09-03	Visit	1
ERS1132747	ID101131	ID10113	ID101131	MZ	66	female	2014-07-03	Visit	1
ERS1132768	ID104392	ID10439	ID104392	MZ	60	female	2014-10-03	Visit	1
ERS1132767	ID104391	ID10439	ID104391	MZ	60	female	2014-09-03	Visit	1
ERS1132754	ID101741	ID10174	ID101741	DZ	42	female	2/19/14	Visit	1
ERS1132804	ID112062	ID11206	ID112062	DZ	67	female	2014-06-03	Visit	1
ERS1132803	ID112061	ID11206	ID112061	DZ	67	female	2014-07-03	Visit	1
ERS1132780	ID106531	ID10653	ID106531	DZ	63	female	2014-12-03	Visit	1
ERS1132784	ID109801	ID10980	ID109801	DZ	62	female	3/14/14	Visit	1
ERS1132785	ID109802	ID10980	ID109802	DZ	62	female	3/14/14	Visit	1
ERS1132776	ID105632	ID10563	ID105632	DZ	64	female	2014-11-03	Postal	1
ERS1132752	ID101731	ID10173	ID101731	DZ	71	female	3/17/14	Visit	1
ERS1132753	ID101732	ID10173	ID101732	DZ	71	female	3/16/14	Visit	1
ERS1132865	ID108711	ID10871	ID108711	MZ	58	female	3/20/14	Visit	1
ERS1132860	ID108381	ID10838	ID108381	MZ	68	female	3/21/14	Visit	1
ERS1132861	ID108382	ID10838	ID108382	MZ	68	female	3/21/14	Visit	1
ERS1132882	ID112092	ID11209	ID112092	DZ	44	female	3/22/14	Visit	1
ERS1132881	ID112091	ID11209	ID112091	DZ	44	female	3/23/14	Visit	1
ERS1132894	ID115482	ID11548	ID115482	DZ	81	female	3/24/14	Visit	1
ERS1132893	ID115481	ID11548	ID115481	DZ	81	female	3/24/14	Visit	1
ERS1132873	ID111131	ID11113	ID111131	MZ	67	female	3/17/14	Visit	1
ERS1132834	ID104322	ID10432	ID104322	DZ	76	female	3/23/14	Visit	1
ERS1132833	ID104321	ID10432	ID104321	DZ	76	female	3/23/14	Visit	1
ERS1132829	ID103042	ID10304	ID103042	DZ	57	female	3/26/14	Visit	1
ERS1132828	ID103041	ID10304	ID103041	DZ	57	female	3/26/14	Visit	1
ERS1132853	ID106372	ID10637	ID106372	DZ	61	female	3/27/14	Visit	1
ERS1132852	ID106371	ID10637	ID106371	DZ	61	female	3/26/14	Visit	1
ERS1132875	ID111162	ID11116	ID111162	MZ	54	female	3/18/14	Visit	1
ERS1132823	ID100571	ID10057	ID100571	MZ	73	female	3/26/14	Postal	1
ERS1132835	ID104351	ID10435	ID104351	DZ	46	female	3/27/14	Visit	1
ERS1132847	ID105721	ID10572	ID105721	DZ	44	female	3/31/14	Visit	1
ERS1132848	ID105722	ID10572	ID105722	DZ	44	female	3/31/14	Visit	1
ERS1132892	ID115421	ID11542	ID115421	DZ	60	female	3/31/14	Visit	1
ERS1132874	ID111161	ID11116	ID111161	MZ	54	female	3/18/14	Visit	1
ERS1132827	ID102841	ID10284	ID102841	DZ	71	male	3/31/14	Postal	1
ERS1132877	ID111352	ID11135	ID111352	DZ	68	female	3/31/14	Visit	1
ERS1132862	ID108451	ID10845	ID108451	MZ	75	female	2014-01-04	Visit	1
ERS1132863	ID108452	ID10845	ID108452	MZ	75	female	2014-01-04	Visit	1
ERS1132824	ID100572	ID10057	ID100572	MZ	73	female	3/18/14	Visit	1
ERS1132846	ID105652	ID10565	ID105652	DZ	63	female	2014-01-04	Visit	1
ERS1132845	ID105651	ID10565	ID105651	DZ	63	female	2014-01-04	Visit	1
ERS1132826	ID101722	ID10172	ID101722	DZ	61	female	2014-02-04	Visit	1
ERS1132825	ID101721	ID10172	ID101721	DZ	61	female	2014-03-04	Visit	1
ERS1132859	ID108152	ID10815	ID108152	DZ	42	female	2014-04-04	Visit	1
ERS1132838	ID104362	ID10436	ID104362	MZ	38	female	2014-07-04	Visit	1
ERS1132854	ID107311	ID10731	ID107311	MZ	62	female	2014-03-04	Postal	1
ERS1132885	ID114401	ID11440	ID114401	MZ	64	female	2014-07-04	Visit	1
ERS1132886	ID114402	ID11440	ID114402	MZ	64	female	2014-07-04	Visit	1
ERS1132851	ID106051	ID10605	ID106051	DZ	63	female	2014-12-04	Visit	1
ERS1132871	ID110801	ID11080	ID110801	DZ	55	female	2014-12-04	Visit	1
ERS1132872	ID110802	ID11080	ID110802	DZ	55	female	2014-12-04	Visit	1
ERS1132866	ID108712	ID10871	ID108712	MZ	58	female	3/20/14	Visit	1
ERS1132857	ID108081	ID10808	ID108081	DZ	72	female	4/14/14	Visit	1
ERS1132858	ID108082	ID10808	ID108082	DZ	72	female	4/14/14	Visit	1
ERS1132880	ID112032	ID11203	ID112032	DZ	56	female	4/15/14	Visit	1
ERS1132864	ID108512	ID10851	ID108512	DZ	64	female	4/16/14	Visit	1
ERS1132926	ID108511	ID10851	ID108511	DZ	64	female	4/15/14	Visit	1
ERS1132904	ID101602	ID10160	ID101602	MZ	50	female	4/24/14	Visit	1
ERS1132936	ID111141	ID11114	ID111141	MZ	50	female	4/17/14	Visit	1
ERS1132972	ID115731	ID11573	ID115731	DZ	47	female	4/22/14	Visit	1
ERS1132970	ID115551	ID11555	ID115551	MZ	60	female	4/27/14	Visit	1
ERS1132971	ID115552	ID11555	ID115552	MZ	60	female	4/26/14	Visit	1
ERS1132903	ID101601	ID10160	ID101601	MZ	50	female	4/28/14	Postal	1
ERS1132941	ID112012	ID11201	ID112012	MZ	54	female	4/29/14	Visit	1
ERS1132940	ID112011	ID11201	ID112011	MZ	54	female	4/28/14	Visit	1
ERS1132920	ID106552	ID10655	ID106552	DZ	61	female	4/29/14	Visit	1
ERS1132919	ID106551	ID10655	ID106551	DZ	61	female	4/29/14	Visit	1
ERS1132964	ID114451	ID11445	ID114451	MZ	44	female	4/30/14	Visit	1
ERS1132957	ID114292	ID11429	ID114292	MZ	60	female	2014-02-05	Visit	1
ERS1132956	ID114291	ID11429	ID114291	MZ	60	female	2014-01-05	Visit	1
ERS1132958	ID114321	ID11432	ID114321	DZ	67	female	2014-04-05	Visit	1
ERS1132959	ID114322	ID11432	ID114322	DZ	67	female	2014-05-05	Visit	1
ERS1132914	ID105151	ID10515	ID105151	DZ	61	female	2014-07-05	Visit	1
ERS1132955	ID114281	ID11428	ID114281	MZ	64	female	2014-05-05	Visit	1
ERS1132922	ID106562	ID10656	ID106562	DZ	67	male	2014-06-05	Visit	1
ERS1132921	ID106561	ID10656	ID106561	DZ	67	male	2014-08-05	Visit	1
ERS1132901	ID100531	ID10053	ID100531	DZ	75	female	2014-11-05	Visit	1
ERS1132902	ID100532	ID10053	ID100532	DZ	75	female	2014-12-05	Visit	1
ERS1132917	ID105521	ID10552	ID105521	DZ	45	female	2014-11-05	Visit	1
ERS1132918	ID105522	ID10552	ID105522	DZ	45	female	2014-10-05	Visit	1
ERS1132942	ID112031	ID11203	ID112031	DZ	56	female	2014-10-05	Postal	1
ERS1132906	ID102042	ID10204	ID102042	MZ	67	female	2014-11-05	Visit	1
ERS1132966	ID114482	ID11448	ID114482	DZ	76	female	5/13/14	Postal	1
ERS1132965	ID114481	ID11448	ID114481	DZ	76	female	2014-12-05	Postal	1
ERS1132938	ID111192	ID11119	ID111192	MZ	82	female	5/14/14	Visit	1
ERS1132937	ID111191	ID11119	ID111191	MZ	82	female	5/15/14	Visit	1
ERS1132974	ID115821	ID11582	ID115821	MZ	63	female	5/16/14	Visit	1
ERS1132924	ID107951	ID10795	ID107951	DZ	68	female	5/15/14	Visit	1
ERS1132925	ID107952	ID10795	ID107952	DZ	68	female	5/16/14	Visit	1
ERS1132950	ID112461	ID11246	ID112461	DZ	38	female	5/13/14	Visit	1
ERS1132951	ID112462	ID11246	ID112462	DZ	38	female	5/16/14	Visit	1
ERS1132928	ID109282	ID10928	ID109282	DZ	68	female	5/20/14	Visit	1
ERS1132927	ID109281	ID10928	ID109281	DZ	68	female	5/20/14	Visit	1
ERS1132954	ID113761	ID11376	ID113761	MZ	66	female	5/21/14	Postal	1
ERS1133024	ID114671	ID11467	ID114671	MZ	57	female	5/27/14	Visit	1
ERS1133025	ID114672	ID11467	ID114672	MZ	57	female	5/26/14	Visit	1
ERS1132981	ID101672	ID10167	ID101672	MZ	50	female	5/27/14	Visit	1
ERS1132980	ID101671	ID10167	ID101671	MZ	50	female	5/27/14	Visit	1
ERS1133021	ID114082	ID11408	ID114082	MZ	54	female	5/29/14	Visit	1
ERS1133023	ID114302	ID11430	ID114302	MZ	46	female	5/30/14	Visit	1
ERS1133022	ID114301	ID11430	ID114301	MZ	46	female	5/29/14	Visit	1
ERS1132994	ID106501	ID10650	ID106501	MZ	57	female	2014-02-06	Visit	1
ERS1132990	ID105352	ID10535	ID105352	MZ	40	female	5/29/14	Visit	1
ERS1132989	ID105351	ID10535	ID105351	MZ	40	female	2014-02-06	Visit	1
ERS1133020	ID113762	ID11376	ID113762	MZ	66	female	2014-02-06	Postal	1
ERS1132985	ID103102	ID10310	ID103102	MZ	61	female	2014-02-06	Visit	1
ERS1132984	ID103101	ID10310	ID103101	MZ	61	female	2014-03-06	Visit	1
ERS1132976	ID100622	ID10062	ID100622	MZ	74	female	2014-03-06	Visit	1
ERS1132975	ID100621	ID10062	ID100621	MZ	74	female	2014-03-06	Visit	1
ERS1132995	ID106721	ID10672	ID106721	MZ	67	female	2014-03-06	Visit	1
ERS1133014	ID111281	ID11128	ID111281	MZ	77	female	2014-09-06	Visit	1
ERS1133015	ID111282	ID11128	ID111282	MZ	77	female	2014-07-06	Visit	1
ERS1133036	ID115801	ID11580	ID115801	DZ	70	female	2014-06-06	Visit	1
ERS1133002	ID109982	ID10998	ID109982	MZ	83	female	2014-10-06	Visit	1
ERS1133005	ID110871	ID11087	ID110871	DZ	65	female	2014-12-06	Visit	1
ERS1133035	ID115791	ID11579	ID115791	MZ	70	female	6/24/14	Visit	1
ERS1132993	ID106471	ID10647	ID106471	MZ	69	female	6/18/14	Visit	1
ERS1132977	ID100991	ID10099	ID100991	MZ	62	female	6/16/14	Visit	1
ERS1133050	ID104482	ID10448	ID104482	DZ	67	female	6/28/14	Visit	1
ERS1133049	ID104481	ID10448	ID104481	DZ	67	female	6/28/14	Visit	1
ERS1133080	ID115792	ID11579	ID115792	MZ	70	female	6/23/14	Visit	1
ERS1133038	ID100512	ID10051	ID100512	DZ	57	female	6/30/14	Visit	1
ERS1133037	ID100511	ID10051	ID100511	DZ	57	female	6/29/14	Visit	1
ERS1133046	ID101631	ID10163	ID101631	MZ	65	female	6/26/14	Visit	1
ERS1133069	ID110222	ID11022	ID110222	DZ	61	female	2014-01-07	Visit	1
ERS1133068	ID110221	ID11022	ID110221	DZ	61	female	2014-01-07	Visit	1
ERS1133077	ID111171	ID11117	ID111171	DZ	80	female	2014-02-07	Visit	1
ERS1133052	ID105402	ID10540	ID105402	MZ	64	female	2014-02-07	Postal	1
ERS1133078	ID112041	ID11204	ID112041	DZ	73	female	6/23/14	Visit	1
ERS1133073	ID110712	ID11071	ID110712	MZ	60	female	6/30/14	Visit	1
ERS1133079	ID115772	ID11577	ID115772	MZ	72	female	6/26/14	Visit	1
ERS1133072	ID110711	ID11071	ID110711	MZ	60	female	2014-02-07	Visit	1
ERS1133039	ID100521	ID10052	ID100521	MZ	60	female	2014-05-07	Visit	1
ERS1133040	ID100522	ID10052	ID100522	MZ	60	female	2014-05-07	Visit	1
ERS1133051	ID105401	ID10540	ID105401	MZ	64	female	2014-05-07	Postal	1
ERS1133041	ID100591	ID10059	ID100591	MZ	75	female	2014-06-07	Visit	1
ERS1133042	ID100592	ID10059	ID100592	MZ	75	female	2014-05-07	Visit	1
ERS1133104	ID109892	ID10989	ID109892	DZ	68	male	2013-05-03	Visit	1
ERS1133093	ID105271	ID10527	ID105271	DZ	65	male	3/13/13	Postal	1
ERS1133081	ID100942	ID10094	ID100942	DZ	68	female	3/25/13	Postal	1
ERS1133109	ID112241	ID11224	ID112241	DZ	65	female	3/19/13	Postal	1
ERS1133099	ID107361	ID10736	ID107361	DZ	66	female	4/16/13	Postal	1
ERS1133098	ID107122	ID10712	ID107122	MZ	66	female	4/17/13	Postal	1
ERS1133100	ID107362	ID10736	ID107362	DZ	66	female	2013-09-04	Postal	1
ERS1133097	ID107121	ID10712	ID107121	MZ	66	female	2013-07-04	Postal	1
ERS1133113	ID113371	ID11337	ID113371	MZ	77	female	2013-09-04	Postal	1
ERS1133092	ID105171	ID10517	ID105171	MZ	54	female	2013-10-04	Postal	1
ERS1133103	ID107891	ID10789	ID107891	DZ	76	female	2013-08-04	Postal	1
ERS1133112	ID113211	ID11321	ID113211	MZ	66	female	4/15/13	Postal	1
ERS1133119	ID115861	ID11586	ID115861	MZ	46	female	1/17/13	Visit	1
ERS1133108	ID111861	ID11186	ID111861	DZ	53	female	1/31/13	Visit	1
ERS1133111	ID112932	ID11293	ID112932	MZ	44	female	3/26/13	Postal	1
ERS1133116	ID114392	ID11439	ID114392	MZ	62	female	3/13/13	Postal	1
ERS1133114	ID113801	ID11380	ID113801	DZ	66	female	1/16/13	Visit	1
ERS1133115	ID113802	ID11380	ID113802	DZ	66	female	1/16/13	Visit	1
ERS1133110	ID112931	ID11293	ID112931	MZ	44	female	3/26/13	Postal	1
ERS1133102	ID107652	ID10765	ID107652	MZ	57	female	3/18/13	Visit	1
ERS1133082	ID101171	ID10117	ID101171	MZ	48	female	1/28/13	Visit	1
ERS1133118	ID115121	ID11512	ID115121	MZ	59	female	3/26/13	Postal	1
ERS1133101	ID107651	ID10765	ID107651	MZ	57	female	3/17/13	Visit	1
ERS1133086	ID103072	ID10307	ID103072	DZ	72	female	2/20/13	Postal	1
ERS1133095	ID106241	ID10624	ID106241	DZ	70	female	2013-12-03	Postal	1
ERS1133084	ID102291	ID10229	ID102291	DZ	66	female	1/15/13	Visit	1
ERS1133083	ID101891	ID10189	ID101891	MZ	46	female	11/22/12	Visit	1
ERS1133151	ID107232	ID10723	ID107232	MZ	70	female	2/16/11	Visit	1
ERS1133169	ID109221	ID10922	ID109221	DZ	55	female	2/16/11	Visit	1
ERS1133133	ID103532	ID10353	ID103532	DZ	54	female	2011-11-02	Visit	1
ERS1133152	ID107881	ID10788	ID107881	MZ	61	female	2011-01-02	Visit	1
ERS1133144	ID105812	ID10581	ID105812	DZ	60	female	2011-09-01	Visit	1
ERS1133145	ID105921	ID10592	ID105921	MZ	62	female	2011-06-01	Visit	1
ERS1133131	ID103481	ID10348	ID103481	DZ	69	female	2011-04-01	Visit	1
ERS1133143	ID105811	ID10581	ID105811	DZ	60	female	2011-09-01	Visit	1
ERS1133180	ID110992	ID11099	ID110992	DZ	41	female	1/13/11	Visit	1
ERS1133138	ID104992	ID10499	ID104992	DZ	79	female	2011-06-01	Visit	1
ERS1133179	ID110782	ID11078	ID110782	DZ	72	female	2011-12-01	Visit	1
ERS1133178	ID110781	ID11078	ID110781	DZ	72	female	2011-12-01	Visit	1
ERS1133123	ID100881	ID10088	ID100881	DZ	63	female	2011-08-01	Visit	1
ERS1133136	ID104641	ID10464	ID104641	DZ	50	female	2/24/11	Visit	1
ERS1133142	ID105782	ID10578	ID105782	DZ	60	female	2/21/11	Visit	1
ERS1133129	ID103362	ID10336	ID103362	DZ	50	female	2/21/11	Visit	1
ERS1133175	ID110562	ID11056	ID110562	DZ	60	female	2/22/11	Visit	1
ERS1133173	ID110321	ID11032	ID110321	DZ	63	female	2/16/11	Visit	1
ERS1133174	ID110561	ID11056	ID110561	DZ	60	female	2/21/11	Visit	1
ERS1133128	ID103241	ID10324	ID103241	DZ	44	female	2011-01-02	Visit	1
ERS1133132	ID103482	ID10348	ID103482	DZ	69	female	2011-02-01	Visit	1
ERS1133177	ID110612	ID11061	ID110612	DZ	55	female	1/21/11	Visit	1
ERS1133124	ID100951	ID10095	ID100951	DZ	64	female	1/31/11	Visit	1
ERS1133199	ID115612	ID11561	ID115612	DZ	67	female	2011-04-02	Visit	1
ERS1133139	ID105301	ID10530	ID105301	DZ	68	female	2011-01-02	Visit	1
ERS1133172	ID110202	ID11020	ID110202	DZ	80	female	2011-07-02	Visit	1
ERS1133171	ID109412	ID10941	ID109412	DZ	73	female	1/26/11	Visit	1
ERS1133183	ID111372	ID11137	ID111372	DZ	63	female	1/26/11	Visit	1
ERS1133146	ID105931	ID10593	ID105931	DZ	61	female	1/26/11	Visit	1
ERS1133182	ID111371	ID11137	ID111371	DZ	63	female	1/28/11	Visit	1
ERS1133153	ID107922	ID10792	ID107922	DZ	68	female	1/26/11	Visit	1
ERS1133147	ID105932	ID10593	ID105932	DZ	61	female	1/27/11	Visit	1
ERS1133168	ID109212	ID10921	ID109212	MZ	74	female	1/27/11	Visit	1
ERS1133176	ID110611	ID11061	ID110611	DZ	55	female	1/21/11	Visit	1
ERS1133137	ID104952	ID10495	ID104952	DZ	61	female	12/15/10	Visit	1
ERS1133120	ID100032	ID10003	ID100032	DZ	65	female	1/19/11	Postal	1
ERS1133191	ID113651	ID11365	ID113651	MZ	59	female	1/23/11	Visit	1
ERS1133186	ID112352	ID11235	ID112352	DZ	61	female	1/21/11	Visit	1
ERS1133162	ID109001	ID10900	ID109001	DZ	62	female	1/21/11	Visit	1
ERS1133161	ID108842	ID10884	ID108842	DZ	64	female	1/23/11	Visit	1
ERS1133192	ID113652	ID11365	ID113652	MZ	59	female	1/24/11	Visit	1
ERS1133125	ID102062	ID10206	ID102062	DZ	66	female	1/23/11	Visit	1
ERS1133196	ID114732	ID11473	ID114732	DZ	63	female	2011-05-01	Visit	1
ERS1133166	ID109051	ID10905	ID109051	DZ	65	female	1/20/11	Visit	1
ERS1133167	ID109052	ID10905	ID109052	DZ	65	female	1/19/11	Visit	1
ERS1133164	ID109021	ID10902	ID109021	DZ	51	female	1/25/11	Visit	1
ERS1133203	ID115781	ID11578	ID115781	DZ	68	female	1/25/11	Visit	1
ERS1133170	ID109411	ID10941	ID109411	DZ	73	female	1/27/11	Visit	1
ERS1133201	ID115721	ID11572	ID115721	MZ	57	female	12/15/10	Visit	1
ERS1133141	ID105322	ID10532	ID105322	MZ	67	female	2011-08-02	Visit	1
ERS1133140	ID105321	ID10532	ID105321	MZ	67	female	2011-08-02	Visit	1
ERS1133190	ID113621	ID11362	ID113621	DZ	73	female	2/15/11	Visit	1
ERS1133135	ID104612	ID10461	ID104612	MZ	74	female	2/15/11	Visit	1
ERS1133202	ID115722	ID11572	ID115722	MZ	57	female	12/15/10	Visit	1
ERS1133156	ID108202	ID10820	ID108202	MZ	73	female	2/25/11	Postal	1
ERS1133187	ID112831	ID11283	ID112831	MZ	68	female	2/23/11	Visit	1
ERS1133150	ID106762	ID10676	ID106762	MZ	46	female	2/22/11	Visit	1
ERS1133266	ID111382	ID11138	ID111382	DZ	64	female	2011-08-02	Postal	1
ERS1133275	ID113181	ID11318	ID113181	DZ	61	female	2/13/11	Visit	1
ERS1133227	ID105791	ID10579	ID105791	DZ	70	female	1/18/11	Visit	1
ERS1133210	ID102752	ID10275	ID102752	MZ	47	female	2011-10-02	Visit	1
ERS1133249	ID108972	ID10897	ID108972	DZ	64	female	2011-07-02	Visit	1
ERS1133274	ID112681	ID11268	ID112681	DZ	57	female	1/16/11	Visit	1
ERS1133262	ID110192	ID11019	ID110192	DZ	54	female	2011-06-01	Visit	1
ERS1133224	ID105412	ID10541	ID105412	DZ	47	female	2011-06-02	Visit	1
ERS1133209	ID102292	ID10229	ID102292	DZ	64	female	2011-08-02	Visit	1
ERS1133271	ID112412	ID11241	ID112412	DZ	67	female	1/18/11	Visit	1
ERS1133214	ID103531	ID10353	ID103531	DZ	54	female	2011-11-02	Visit	1
ERS1133228	ID105792	ID10579	ID105792	DZ	70	female	1/16/11	Visit	1
ERS1133231	ID106282	ID10628	ID106282	DZ	71	female	4/18/11	Visit	1
ERS1133206	ID101952	ID10195	ID101952	MZ	72	female	1/17/11	Visit	1
ERS1133233	ID106692	ID10669	ID106692	DZ	59	female	4/19/11	Visit	1
ERS1133281	ID114851	ID11485	ID114851	MZ	59	female	2011-12-04	Visit	1
ERS1133283	ID114881	ID11488	ID114881	DZ	59	female	2011-07-01	Postal	1
ERS1133212	ID103211	ID10321	ID103211	MZ	72	female	3/13/11	Visit	1
ERS1133207	ID102132	ID10213	ID102132	MZ	58	female	2011-02-03	Visit	1
ERS1133278	ID113661	ID11366	ID113661	MZ	70	female	2011-03-03	Visit	1
ERS1133244	ID107871	ID10787	ID107871	DZ	41	female	2011-07-03	Visit	1
ERS1133284	ID114891	ID11489	ID114891	MZ	65	female	3/13/11	Visit	1
ERS1133250	ID109002	ID10900	ID109002	DZ	62	female	1/18/11	Visit	1
ERS1133218	ID104621	ID10462	ID104621	MZ	68	female	2011-03-04	Visit	1
ERS1133277	ID113632	ID11363	ID113632	MZ	55	female	2011-06-04	Visit	1
ERS1133269	ID112212	ID11221	ID112212	DZ	54	female	2011-03-04	Visit	1
ERS1133270	ID112222	ID11222	ID112222	DZ	72	female	3/29/11	Visit	1
ERS1133263	ID110261	ID11026	ID110261	MZ	64	female	3/22/11	Visit	1
ERS1133276	ID113631	ID11363	ID113631	MZ	55	female	2011-07-04	Visit	1
ERS1133256	ID109692	ID10969	ID109692	DZ	67	female	3/23/11	Visit	1
ERS1133251	ID109011	ID10901	ID109011	DZ	63	female	2011-08-01	Visit	1
ERS1133286	ID115822	ID11582	ID115822	MZ	59	female	2011-01-04	Visit	1
ERS1133257	ID109861	ID10986	ID109861	DZ	73	female	3/25/11	Visit	1
ERS1133226	ID105702	ID10570	ID105702	DZ	56	female	3/24/11	Visit	1
ERS1133216	ID103582	ID10358	ID103582	DZ	71	female	3/28/11	Visit	1
ERS1133261	ID110042	ID11004	ID110042	DZ	66	female	3/27/11	Visit	1
ERS1133258	ID109862	ID10986	ID109862	DZ	73	female	3/24/11	Visit	1
ERS1133215	ID103581	ID10358	ID103581	DZ	71	female	3/28/11	Visit	1
ERS1133239	ID106931	ID10693	ID106931	MZ	56	female	3/27/11	Visit	1
ERS1133252	ID109271	ID10927	ID109271	MZ	47	female	3/27/11	Visit	1
ERS1133243	ID107832	ID10783	ID107832	MZ	72	female	3/26/11	Visit	1
ERS1133225	ID105701	ID10570	ID105701	DZ	56	female	3/25/11	Visit	1
ERS1133229	ID106271	ID10627	ID106271	MZ	77	female	2011-03-04	Visit	1
ERS1133211	ID103012	ID10301	ID103012	DZ	62	female	3/30/11	Visit	1
ERS1133268	ID112211	ID11221	ID112211	DZ	54	female	2011-02-04	Visit	1
ERS1133253	ID109272	ID10927	ID109272	MZ	47	female	3/28/11	Visit	1
ERS1133223	ID105411	ID10541	ID105411	DZ	47	female	2011-06-02	Visit	1
ERS1133219	ID104622	ID10462	ID104622	MZ	68	female	2011-04-04	Visit	1
ERS1133245	ID107901	ID10790	ID107901	DZ	60	female	3/29/11	Visit	1
ERS1133259	ID109871	ID10987	ID109871	DZ	39	female	2011-04-04	Visit	1
ERS1133246	ID107902	ID10790	ID107902	DZ	60	female	3/28/11	Visit	1
ERS1133248	ID108371	ID10837	ID108371	MZ	60	female	2011-11-04	Visit	1
ERS1133204	ID101141	ID10114	ID101141	DZ	63	female	1/18/11	Visit	1
ERS1133238	ID106921	ID10692	ID106921	DZ	58	female	4/15/11	Visit	1
ERS1133288	ID115862	ID11586	ID115862	MZ	44	female	4/13/11	Visit	1
ERS1133315	ID105731	ID10573	ID105731	DZ	59	female	4/19/11	Visit	1
ERS1133365	ID115982	ID11598	ID115982	DZ	57	female	2011-06-04	Visit	1
ERS1133311	ID104841	ID10484	ID104841	DZ	53	female	2011-09-04	Visit	1
ERS1133345	ID110591	ID11059	ID110591	MZ	65	female	2011-06-04	Visit	1
ERS1133310	ID104842	ID10484	ID104842	DZ	53	female	4/14/11	Visit	1
ERS1133304	ID104652	ID10465	ID104652	DZ	60	female	4/14/11	Visit	1
ERS1133308	ID104732	ID10473	ID104732	DZ	73	female	4/13/11	Visit	1
ERS1133307	ID104731	ID10473	ID104731	DZ	73	female	4/13/11	Visit	1
ERS1133331	ID107931	ID10793	ID107931	DZ	72	female	2011-09-03	Postal	1
ERS1133329	ID107872	ID10787	ID107872	DZ	41	female	2011-06-02	Visit	1
ERS1133291	ID100602	ID10060	ID100602	MZ	65	female	2011-09-03	Visit	1
ERS1133347	ID110772	ID11077	ID110772	MZ	68	female	2011-09-03	Visit	1
ERS1133356	ID113821	ID11382	ID113821	MZ	60	female	2011-07-03	Visit	1
ERS1133309	ID104822	ID10482	ID104822	DZ	77	female	2011-10-03	Visit	1
ERS1133299	ID103212	ID10321	ID103212	MZ	72	female	3/14/11	Visit	1
ERS1133327	ID107381	ID10738	ID107381	MZ	75	female	2011-08-03	Visit	1
ERS1133290	ID100052	ID10005	ID100052	DZ	67	female	2/27/11	Visit	1
ERS1133296	ID101651	ID10165	ID101651	DZ	58	female	2011-03-03	Visit	1
ERS1133346	ID110592	ID11059	ID110592	MZ	65	female	2011-06-04	Visit	1
ERS1133301	ID103541	ID10354	ID103541	DZ	68	female	2011-02-03	Visit	1
ERS1133297	ID101652	ID10165	ID101652	DZ	58	female	2011-04-03	Visit	1
ERS1133323	ID106672	ID10667	ID106672	MZ	62	female	3/16/11	Visit	1
ERS1133319	ID106281	ID10628	ID106281	DZ	71	female	4/18/11	Visit	1
ERS1133358	ID114561	ID11456	ID114561	MZ	70	female	3/16/11	Visit	1
ERS1133305	ID104721	ID10472	ID104721	DZ	76	female	3/22/11	Visit	1
ERS1133333	ID108212	ID10821	ID108212	MZ	73	female	3/14/11	Visit	1
ERS1133322	ID106671	ID10667	ID106671	MZ	62	female	3/15/11	Visit	1
ERS1133332	ID108211	ID10821	ID108211	MZ	73	female	3/15/11	Visit	1
ERS1133324	ID106722	ID10672	ID106722	MZ	64	female	3/17/11	Visit	1
ERS1133340	ID109602	ID10960	ID109602	MZ	59	female	3/16/11	Visit	1
ERS1133306	ID104722	ID10472	ID104722	DZ	76	female	3/21/11	Visit	1
ERS1133295	ID101212	ID10121	ID101212	MZ	71	female	2011-09-04	Visit	1
ERS1133364	ID115841	ID11584	ID115841	MZ	77	female	3/22/11	Visit	1
ERS1133341	ID109712	ID10971	ID109712	DZ	45	female	5/15/11	Visit	1
ERS1133362	ID115051	ID11505	ID115051	DZ	75	female	2011-07-05	Visit	1
ERS1133294	ID101211	ID10121	ID101211	MZ	71	female	2011-08-04	Visit	1
ERS1133357	ID113832	ID11383	ID113832	DZ	63	female	2011-09-05	Visit	1
ERS1133314	ID105611	ID10561	ID105611	DZ	56	female	2011-08-05	Visit	1
ERS1133312	ID105591	ID10559	ID105591	DZ	64	female	2011-10-05	Visit	1
ERS1133313	ID105592	ID10559	ID105592	DZ	64	female	5/13/11	Visit	1
ERS1133325	ID106771	ID10677	ID106771	DZ	73	female	2011-08-05	Visit	1
ERS1133343	ID110301	ID11030	ID110301	DZ	55	female	2011-09-05	Visit	1
ERS1133298	ID101801	ID10180	ID101801	DZ	68	female	2011-02-05	Visit	1
ERS1133300	ID103511	ID10351	ID103511	DZ	64	female	2011-06-05	Visit	1
ERS1133330	ID107911	ID10791	ID107911	DZ	63	female	2011-10-05	Visit	1
ERS1133353	ID113611	ID11361	ID113611	MZ	48	female	2011-05-05	Visit	1
ERS1133317	ID105742	ID10574	ID105742	DZ	63	female	2011-04-05	Visit	1
ERS1133316	ID105741	ID10574	ID105741	DZ	63	female	2011-03-05	Visit	1
ERS1133374	ID102791	ID10279	ID102791	DZ	78	female	5/29/11	Visit	1
ERS1133381	ID105951	ID10595	ID105951	DZ	56	female	5/31/11	Visit	1
ERS1133411	ID113481	ID11348	ID113481	DZ	58	female	5/25/11	Visit	1
ERS1133391	ID109032	ID10903	ID109032	DZ	64	female	5/28/11	Postal	1
ERS1133378	ID104671	ID10467	ID104671	DZ	60	female	6/15/11	Postal	1
ERS1133386	ID107351	ID10735	ID107351	DZ	45	female	5/23/11	Visit	1
ERS1133366	ID100721	ID10072	ID100721	DZ	53	female	5/19/11	Visit	1
ERS1133413	ID114621	ID11462	ID114621	DZ	32	female	5/23/11	Visit	1
ERS1133414	ID114622	ID11462	ID114622	DZ	32	female	5/24/11	Visit	1
ERS1133388	ID108892	ID10889	ID108892	DZ	62	female	5/17/11	Visit	1
ERS1133417	ID114901	ID11490	ID114901	DZ	56	female	5/18/11	Visit	1
ERS1133395	ID110331	ID11033	ID110331	MZ	44	female	5/16/11	Visit	1
ERS1133387	ID108891	ID10889	ID108891	DZ	62	female	5/15/11	Visit	1
ERS1133418	ID114902	ID11490	ID114902	DZ	56	female	5/16/11	Visit	1
ERS1133401	ID111432	ID11143	ID111432	DZ	61	female	5/15/11	Visit	1
ERS1133368	ID100861	ID10086	ID100861	MZ	59	female	5/23/11	Visit	1
ERS1133400	ID111431	ID11143	ID111431	DZ	61	female	5/17/11	Visit	1
ERS1133379	ID104672	ID10467	ID104672	DZ	60	female	5/21/11	Visit	1
ERS1133385	ID106541	ID10654	ID106541	DZ	63	female	5/23/11	Visit	1
ERS1133369	ID100862	ID10086	ID100862	MZ	59	female	5/23/11	Visit	1
ERS1133409	ID113421	ID11342	ID113421	DZ	48	female	5/14/11	Visit	1
ERS1133416	ID114862	ID11486	ID114862	MZ	60	female	4/26/11	Postal	1
ERS1133423	ID115852	ID11585	ID115852	DZ	48	female	5/26/11	Postal	1
ERS1133422	ID115851	ID11585	ID115851	DZ	47	female	5/18/11	Visit	1
ERS1133384	ID106321	ID10632	ID106321	DZ	46	female	11/28/11	Visit	1
ERS1133370	ID100872	ID10087	ID100872	DZ	69	female	10/20/11	Visit	1
ERS1133407	ID112712	ID11271	ID112712	DZ	62	female	11/23/11	Visit	1
ERS1133383	ID106302	ID10630	ID106302	MZ	61	female	11/20/11	Visit	1
ERS1133408	ID112732	ID11273	ID112732	DZ	53	female	2011-10-10	Visit	1
ERS1133399	ID111422	ID11142	ID111422	DZ	48	female	2011-02-10	Visit	1
ERS1133464	ID109561	ID10956	ID109561	DZ	63	female	2012-09-03	Visit	1
ERS1133444	ID104661	ID10466	ID104661	DZ	64	female	2012-07-01	Visit	1
ERS1133427	ID100941	ID10094	ID100941	DZ	67	female	2012-04-02	Visit	1
ERS1133452	ID106601	ID10660	ID106601	DZ	71	female	2012-12-03	Visit	1
ERS1133449	ID106092	ID10609	ID106092	DZ	56	female	2011-07-12	Visit	1
ERS1133438	ID103591	ID10359	ID103591	DZ	66	female	2012-09-02	Visit	1
ERS1133457	ID108391	ID10839	ID108391	DZ	61	female	2012-11-03	Visit	1
ERS1133448	ID106091	ID10609	ID106091	DZ	56	female	2011-08-12	Visit	1
ERS1133468	ID111401	ID11140	ID111401	DZ	79	female	1/30/12	Visit	1
ERS1133474	ID114572	ID11457	ID114572	DZ	67	female	11/22/11	Visit	1
ERS1133463	ID109251	ID10925	ID109251	MZ	67	female	2012-09-01	Visit	1
ERS1133472	ID113601	ID11360	ID113601	DZ	59	female	2012-12-03	Visit	1
ERS1133439	ID103592	ID10359	ID103592	DZ	66	female	2012-10-02	Visit	1
ERS1133451	ID106602	ID10660	ID106602	DZ	71	female	2012-12-03	Visit	1
ERS1133428	ID100982	ID10098	ID100982	DZ	64	female	2011-12-12	Visit	1
ERS1133466	ID110292	ID11029	ID110292	DZ	60	female	2012-12-02	Visit	1
ERS1133450	ID106311	ID10631	ID106311	DZ	50	female	12/20/11	Visit	1
ERS1133470	ID112851	ID11285	ID112851	DZ	63	female	2012-05-03	Visit	1
ERS1133446	ID105821	ID10582	ID105821	DZ	62	female	1/15/12	Visit	1
ERS1133461	ID108991	ID10899	ID108991	DZ	56	female	2/29/12	Visit	1
ERS1133469	ID112791	ID11279	ID112791	DZ	65	female	2011-12-12	Visit	1
ERS1133460	ID108731	ID10873	ID108731	MZ	64	female	2012-07-02	Visit	1
ERS1133471	ID112852	ID11285	ID112852	DZ	63	female	2012-05-03	Visit	1
ERS1133436	ID102412	ID10241	ID102412	DZ	68	female	2011-06-12	Visit	1
ERS1133467	ID111351	ID11135	ID111351	DZ	66	female	3/23/12	Visit	1
ERS1133473	ID114571	ID11457	ID114571	DZ	67	female	2011-06-12	Visit	1
ERS1133425	ID100822	ID10082	ID100822	DZ	56	female	3/19/12	Visit	1
ERS1133501	ID108772	ID10877	ID108772	DZ	67	female	4/16/13	Postal	1
ERS1133495	ID105692	ID10569	ID105692	DZ	49	female	5/22/13	Visit	1
ERS1133498	ID107551	ID10755	ID107551	DZ	60	male	5/22/13	Visit	1
ERS1133504	ID109992	ID10999	ID109992	MZ	87	female	2013-06-06	Visit	1
ERS1133499	ID108652	ID10865	ID108652	DZ	66	female	2013-10-06	Visit	1
ERS1133521	ID115432	ID11543	ID115432	DZ	55	female	6/13/13	Visit	1
ERS1133486	ID103161	ID10316	ID103161	MZ	37	female	7/18/13	Visit	1
ERS1133493	ID105341	ID10534	ID105341	MZ	56	female	7/18/13	Visit	1
ERS1133506	ID110722	ID11072	ID110722	MZ	74	female	7/19/13	Visit	1
ERS1133509	ID111261	ID11126	ID111261	MZ	61	female	7/22/13	Visit	1
ERS1133511	ID111392	ID11139	ID111392	DZ	66	female	7/24/13	Visit	1
ERS1133510	ID111391	ID11139	ID111391	DZ	66	female	7/24/13	Visit	1
ERS1133492	ID105272	ID10527	ID105272	DZ	65	male	2013-01-04	Postal	1
ERS1133500	ID108721	ID10872	ID108721	DZ	65	female	7/29/13	Visit	1
ERS1133519	ID115151	ID11515	ID115151	MZ	71	female	2013-03-04	Postal	1
ERS1133481	ID101791	ID10179	ID101791	MZ	56	female	8/13/13	Visit	1
ERS1133490	ID104501	ID10450	ID104501	DZ	42	female	8/16/13	Visit	1
ERS1133523	ID102141	ID10214	ID102141	DZ	59	female	2013-12-02	Visit	1
ERS1133531	ID113352	ID11335	ID113352	MZ	66	female	4/23/13	Postal	1
ERS1133532	ID113612	ID11361	ID113612	MZ	50	female	2/26/13	Visit	1
ERS1133525	ID105781	ID10578	ID105781	DZ	62	female	2/26/13	Visit	1
ERS1133529	ID110031	ID11003	ID110031	DZ	58	female	3/25/13	Postal	1
ERS1133524	ID103332	ID10333	ID103332	MZ	68	female	1/28/13	Visit	1
ERS1133530	ID111862	ID11186	ID111862	DZ	53	female	1/30/13	Visit	1
ERS1133526	ID108501	ID10850	ID108501	DZ	70	female	3/25/13	Visit	1
ERS1133527	ID108871	ID10887	ID108871	DZ	71	female	3/25/13	Postal	1
ERS1131215	ID104611	ID10461	ID104611	MZ	74	female	2/15/11	Visit	0
ERS1131272	ID115761	ID11576	ID115761	MZ	71	female	5/16/11	Visit	0
ERS1131198	ID100852	ID10085	ID100852	DZ	41	female	5/23/11	Visit	0
ERS1131260	ID113772	ID11377	ID113772	DZ	54	female	2011-05-10	Visit	0
ERS1131388	ID110342	ID11034	ID110342	MZ	59	female	3/22/11	Visit	0
ERS1131357	ID106261	ID10626	ID106261	MZ	83	female	3/16/11	Visit	0
ERS1131445	ID108962	ID10896	ID108962	DZ	70	female	5/20/11	Visit	0
ERS1131471	ID112701	ID11270	ID112701	DZ	55	female	2011-02-06	Visit	0
ERS1131500	ID103262	ID10326	ID103262	DZ	41	female	4/21/11	Visit	0
ERS1131485	ID100922	ID10092	ID100922	MZ	63	female	2011-01-05	Visit	0
ERS1131525	ID109232	ID10923	ID109232	DZ	39	female	2011-03-05	Visit	0
ERS1131579	ID113492	ID11349	ID113492	MZ	55	female	2011-04-10	Visit	0
ERS1131565	ID106732	ID10673	ID106732	MZ	46	female	10/25/11	Visit	0
ERS1131558	ID103352	ID10335	ID103352	DZ	55	female	2011-02-11	Visit	0
ERS1131625	ID111681	ID11168	ID111681	DZ	44	female	2012-12-01	Visit	0
ERS1131589	ID101001	ID10100	ID101001	DZ	73	female	3/14/12	Visit	0
ERS1131615	ID109071	ID10907	ID109071	DZ	58	female	2/14/12	Visit	0
ERS1131649	ID103091	ID10309	ID103091	MZ	56	female	2012-04-12	Visit	0
ERS1131704	ID115592	ID11559	ID115592	DZ	56	male	2012-06-12	Visit	0
ERS1131692	ID113401	ID11340	ID113401	MZ	35	female	2012-06-12	Visit	0
ERS1131670	ID107572	ID10757	ID107572	DZ	69	female	12/21/12	Postal	0
ERS1131669	ID107571	ID10757	ID107571	DZ	69	female	12/19/12	Visit	0
ERS1131656	ID105541	ID10554	ID105541	MZ	67	female	12/18/12	Visit	0
ERS1131642	ID100771	ID10077	ID100771	MZ	60	female	2012-05-12	Visit	0
ERS1131657	ID105542	ID10554	ID105542	MZ	67	female	12/18/12	Visit	0
ERS1131641	ID100741	ID10074	ID100741	MZ	58	female	2012-06-12	Visit	0
ERS1131703	ID115591	ID11559	ID115591	DZ	56	male	2012-07-12	Visit	0
ERS1131745	ID107341	ID10734	ID107341	DZ	45	female	2012-01-07	Postal	0
ERS1131747	ID107612	ID10761	ID107612	MZ	40	female	6/18/12	Postal	0
ERS1131726	ID101861	ID10186	ID101861	MZ	27	female	11/21/12	Visit	0
ERS1131746	ID107611	ID10761	ID107611	MZ	40	female	6/26/12	Postal	0
ERS1131727	ID101862	ID10186	ID101862	MZ	27	female	11/22/12	Visit	0
ERS1131752	ID108911	ID10891	ID108911	MZ	24	female	8/30/12	Postal	0
ERS1131763	ID111001	ID11100	ID111001	DZ	40	male	2012-11-07	Postal	0
ERS1131766	ID112231	ID11223	ID112231	MZ	44	female	2012-02-07	Postal	0
ERS1131721	ID101552	ID10155	ID101552	MZ	55	female	11/22/12	Visit	0
ERS1131839	ID111002	ID11100	ID111002	DZ	40	male	2012-08-08	Postal	0
ERS1131797	ID103121	ID10312	ID103121	MZ	42	female	11/26/12	Visit	0
ERS1131783	ID100791	ID10079	ID100791	MZ	47	male	1/18/13	Visit	0
ERS1131849	ID114102	ID11410	ID114102	MZ	43	female	1/17/13	Visit	0
ERS1131818	ID107531	ID10753	ID107531	MZ	50	female	1/29/13	Visit	0
ERS1131836	ID109961	ID10996	ID109961	DZ	46	male	1/24/13	Visit	0
ERS1131845	ID112401	ID11240	ID112401	DZ	42	male	1/25/13	Visit	0
ERS1131780	ID100662	ID10066	ID100662	MZ	48	female	2013-07-01	Visit	0
ERS1131782	ID100781	ID10078	ID100781	MZ	64	female	2013-05-02	Visit	0
ERS1131807	ID104472	ID10447	ID104472	DZ	58	female	2013-05-02	Visit	0
ERS1131779	ID100661	ID10066	ID100661	MZ	48	female	2013-10-01	Visit	0
ERS1131828	ID108752	ID10875	ID108752	DZ	64	female	1/15/13	Visit	0
ERS1131840	ID111021	ID11102	ID111021	DZ	32	male	1/24/13	Visit	0
ERS1131790	ID101971	ID10197	ID101971	DZ	62	female	1/25/13	Visit	0
ERS1131798	ID103122	ID10312	ID103122	MZ	42	female	11/25/12	Visit	0
ERS1131837	ID109962	ID10996	ID109962	DZ	46	male	1/23/13	Visit	0
ERS1131888	ID106622	ID10662	ID106622	MZ	66	female	2013-06-02	Visit	0
ERS1131909	ID109912	ID10991	ID109912	DZ	63	male	2013-01-03	Visit	0
ERS1131862	ID100792	ID10079	ID100792	MZ	47	male	1/17/13	Visit	0
ERS1131860	ID100761	ID10076	ID100761	MZ	53	female	2/19/13	Visit	0
ERS1131887	ID106621	ID10662	ID106621	MZ	66	female	2013-06-02	Visit	0
ERS1131878	ID103312	ID10331	ID103312	MZ	39	male	2/15/13	Postal	0
ERS1131905	ID108951	ID10895	ID108951	MZ	61	female	2013-08-02	Visit	0
ERS1131921	ID114101	ID11410	ID114101	MZ	43	female	1/15/13	Visit	0
ERS1131893	ID107532	ID10753	ID107532	MZ	50	female	1/31/13	Visit	0
ERS1131861	ID100762	ID10076	ID100762	MZ	53	female	2/19/13	Visit	0
ERS1131865	ID101972	ID10197	ID101972	DZ	62	female	1/23/13	Visit	0
ERS1131906	ID108952	ID10895	ID108952	MZ	61	female	2013-07-02	Visit	0
ERS1131927	ID100801	ID10080	ID100801	MZ	53	female	2013-01-03	Visit	0
ERS1131932	ID101582	ID10158	ID101582	MZ	39	female	3/19/13	Postal	0
ERS1131963	ID111011	ID11101	ID111011	DZ	52	female	2013-07-03	Visit	0
ERS1131975	ID114142	ID11414	ID114142	MZ	59	male	2013-11-03	Postal	0
ERS1131931	ID101581	ID10158	ID101581	MZ	39	female	3/20/13	Postal	0
ERS1131976	ID114151	ID11415	ID114151	MZ	78	male	3/14/13	Postal	0
ERS1131926	ID100642	ID10064	ID100642	DZ	51	female	3/13/13	Visit	0
ERS1131964	ID111012	ID11101	ID111012	DZ	52	female	2013-07-03	Visit	0
ERS1131974	ID114141	ID11414	ID114141	MZ	59	male	3/25/13	Postal	0
ERS1131973	ID114132	ID11413	ID114132	MZ	84	male	3/18/13	Postal	0
ERS1131936	ID103311	ID10331	ID103311	MZ	39	male	2/14/13	Visit	0
ERS1131977	ID114152	ID11415	ID114152	MZ	78	male	2013-12-03	Postal	0
ERS1131956	ID109891	ID10989	ID109891	DZ	68	male	2013-04-03	Visit	0
ERS1131958	ID109902	ID10990	ID109902	DZ	40	male	2013-05-03	Visit	0
ERS1132055	ID115162	ID11516	ID115162	MZ	34	female	3/28/13	Visit	0
ERS1132045	ID114131	ID11413	ID114131	MZ	84	male	2013-08-04	Postal	0
ERS1132066	ID103131	ID10313	ID103131	MZ	32	female	4/15/13	Visit	0
ERS1132093	ID113391	ID11339	ID113391	MZ	47	female	2013-11-04	Visit	0
ERS1132096	ID114511	ID11451	ID114511	DZ	66	female	4/17/13	Postal	0
ERS1132086	ID111202	ID11120	ID111202	MZ	71	female	2013-08-04	Postal	0
ERS1132067	ID103132	ID10313	ID103132	MZ	32	female	4/15/13	Visit	0
ERS1132068	ID103181	ID10318	ID103181	MZ	54	male	4/30/13	Postal	0
ERS1132143	ID111182	ID11118	ID111182	MZ	69	female	5/15/13	Visit	0
ERS1132150	ID113022	ID11302	ID113022	MZ	66	male	5/15/13	Visit	0
ERS1132149	ID113021	ID11302	ID113021	MZ	66	male	5/14/13	Visit	0
ERS1132108	ID100461	ID10046	ID100461	MZ	35	male	5/16/13	Visit	0
ERS1132147	ID112961	ID11296	ID112961	MZ	37	male	5/16/13	Visit	0
ERS1132112	ID101682	ID10168	ID101682	MZ	56	female	5/19/13	Visit	0
ERS1132111	ID101681	ID10168	ID101681	MZ	56	female	5/18/13	Visit	0
ERS1132121	ID107321	ID10732	ID107321	MZ	66	female	5/21/13	Visit	0
ERS1132158	ID115171	ID11517	ID115171	MZ	25	female	5/22/13	Postal	0
ERS1132160	ID115202	ID11520	ID115202	MZ	68	female	5/27/13	Visit	0
ERS1132159	ID115201	ID11520	ID115201	MZ	68	female	5/28/13	Visit	0
ERS1132148	ID112992	ID11299	ID112992	MZ	75	male	5/27/13	Visit	0
ERS1132146	ID112001	ID11200	ID112001	MZ	46	male	2013-09-05	Visit	0
ERS1132155	ID114222	ID11422	ID114222	MZ	35	female	5/29/13	Visit	0
ERS1132154	ID114221	ID11422	ID114221	MZ	35	female	5/29/13	Visit	0
ERS1132114	ID102992	ID10299	ID102992	DZ	63	female	5/29/13	Visit	0
ERS1132151	ID113102	ID11310	ID113102	MZ	29	female	2013-05-06	Postal	0
ERS1132123	ID107522	ID10752	ID107522	MZ	79	male	2013-05-06	Visit	0
ERS1132122	ID107521	ID10752	ID107521	MZ	79	male	2013-05-06	Visit	0
ERS1132106	ID100432	ID10043	ID100432	MZ	72	male	2013-08-05	Visit	0
ERS1132126	ID107592	ID10759	ID107592	MZ	46	male	2013-11-06	Visit	0
ERS1132125	ID107591	ID10759	ID107591	MZ	46	male	2013-11-06	Visit	0
ERS1132107	ID100452	ID10045	ID100452	MZ	56	male	2013-10-05	Visit	0
ERS1132136	ID108681	ID10868	ID108681	DZ	65	female	6/16/13	Visit	0
ERS1132174	ID100471	ID10047	ID100471	MZ	62	male	6/20/13	Visit	0
ERS1132175	ID100472	ID10047	ID100472	MZ	62	male	6/19/13	Visit	0
ERS1132176	ID100731	ID10073	ID100731	MZ	47	female	6/27/13	Visit	0
ERS1132196	ID108551	ID10855	ID108551	DZ	59	female	2013-01-07	Visit	0
ERS1132240	ID113101	ID11310	ID113101	MZ	29	female	6/18/13	Postal	0
ERS1132177	ID100732	ID10073	ID100732	MZ	47	female	6/27/13	Visit	0
ERS1132236	ID112181	ID11218	ID112181	MZ	60	male	2013-07-07	Visit	0
ERS1132187	ID104042	ID10404	ID104042	MZ	62	male	2013-08-07	Visit	0
ERS1132186	ID104041	ID10404	ID104041	MZ	62	male	2013-08-07	Visit	0
ERS1132239	ID113042	ID11304	ID113042	MZ	57	male	2013-08-07	Visit	0
ERS1132238	ID113041	ID11304	ID113041	MZ	57	male	2013-08-07	Visit	0
ERS1132235	ID112162	ID11216	ID112162	MZ	69	male	6/18/13	Visit	0
ERS1132190	ID104332	ID10433	ID104332	DZ	49	female	2013-11-07	Visit	0
ERS1132206	ID109612	ID10961	ID109612	MZ	61	female	2013-10-07	Visit	0
ERS1132205	ID109611	ID10961	ID109611	MZ	61	female	2013-10-07	Visit	0
ERS1132234	ID112161	ID11216	ID112161	MZ	69	male	6/18/13	Visit	0
ERS1132267	ID104051	ID10405	ID104051	MZ	62	male	7/23/13	Postal	0
ERS1132274	ID105432	ID10543	ID105432	DZ	73	female	5/28/13	Visit	0
ERS1132282	ID108491	ID10849	ID108491	MZ	61	female	2013-01-08	Visit	0
ERS1132261	ID102701	ID10270	ID102701	MZ	35	female	8/23/13	Visit	0
ERS1132268	ID104282	ID10428	ID104282	MZ	32	female	8/20/13	Visit	0
ERS1132286	ID109991	ID10999	ID109991	MZ	87	female	2013-06-06	Visit	0
ERS1132276	ID106452	ID10645	ID106452	MZ	56	female	2013-11-08	Visit	0
ERS1132273	ID105381	ID10538	ID105381	MZ	66	female	2013-08-08	Visit	0
ERS1132264	ID102932	ID10293	ID102932	MZ	48	female	2013-12-08	Postal	0
ERS1132296	ID111121	ID11112	ID111121	MZ	52	female	2013-11-08	Postal	0
ERS1132257	ID101481	ID10148	ID101481	MZ	46	male	8/14/13	Visit	0
ERS1132258	ID101482	ID10148	ID101482	MZ	46	male	8/13/13	Visit	0
ERS1132294	ID111111	ID11111	ID111111	MZ	36	female	8/14/13	Postal	0
ERS1132295	ID111112	ID11111	ID111112	MZ	36	female	8/14/13	Postal	0
ERS1132297	ID111122	ID11112	ID111122	MZ	52	female	8/19/13	Postal	0
ERS1132254	ID100281	ID10028	ID100281	MZ	49	female	8/18/13	Visit	0
ERS1132328	ID104131	ID10413	ID104131	DZ	67	female	8/19/13	Visit	0
ERS1132354	ID107371	ID10737	ID107371	MZ	64	female	8/24/13	Visit	0
ERS1132319	ID102991	ID10299	ID102991	DZ	63	female	5/29/13	Visit	0
ERS1132364	ID109812	ID10981	ID109812	DZ	68	female	7/26/13	Visit	0
ERS1132326	ID104021	ID10402	ID104021	MZ	59	male	8/15/13	Visit	0
ERS1132331	ID104281	ID10428	ID104281	MZ	32	female	8/20/13	Visit	0
ERS1132348	ID106911	ID10691	ID106911	MZ	32	female	10/20/13	Visit	0
ERS1132366	ID110091	ID11009	ID110091	DZ	48	female	10/27/13	Visit	0
ERS1132337	ID105512	ID10551	ID105512	MZ	74	male	2013-10-09	Visit	0
ERS1132359	ID108432	ID10843	ID108432	MZ	31	female	10/23/13	Postal	0
ERS1132330	ID104191	ID10419	ID104191	DZ	35	female	2013-06-09	Visit	0
ERS1132357	ID107581	ID10758	ID107581	MZ	53	male	2013-05-09	Visit	0
ERS1132318	ID102951	ID10295	ID102951	DZ	35	female	2013-09-11	Postal	0
ERS1132351	ID107262	ID10726	ID107262	MZ	66	female	10/29/13	Visit	0
ERS1132374	ID112812	ID11281	ID112812	MZ	74	female	2013-09-09	Visit	0
ERS1132371	ID111312	ID11131	ID111312	MZ	52	female	9/14/13	Visit	0
ERS1132370	ID111311	ID11131	ID111311	MZ	52	female	9/13/13	Visit	0
ERS1132378	ID114372	ID11437	ID114372	MZ	60	female	9/15/13	Visit	0
ERS1132377	ID114371	ID11437	ID114371	MZ	60	female	9/16/13	Visit	0
ERS1132358	ID108431	ID10843	ID108431	MZ	31	female	9/15/13	Postal	0
ERS1132424	ID107332	ID10733	ID107332	MZ	81	female	9/16/13	Visit	0
ERS1132438	ID112052	ID11205	ID112052	DZ	57	female	9/23/13	Visit	0
ERS1132405	ID104061	ID10406	ID104061	MZ	60	male	9/18/13	Visit	0
ERS1132402	ID103052	ID10305	ID103052	MZ	38	female	9/30/13	Visit	0
ERS1132426	ID107472	ID10747	ID107472	MZ	81	female	9/30/13	Visit	0
ERS1132385	ID100241	ID10024	ID100241	DZ	66	female	9/29/13	Postal	0
ERS1132414	ID105771	ID10577	ID105771	DZ	64	female	2013-02-10	Visit	0
ERS1132415	ID105772	ID10577	ID105772	DZ	64	female	2013-02-10	Visit	0
ERS1132386	ID100242	ID10024	ID100242	DZ	66	female	9/25/13	Postal	0
ERS1132394	ID101121	ID10112	ID101121	MZ	61	male	2013-03-10	Visit	0
ERS1132395	ID101122	ID10112	ID101122	MZ	61	male	2013-03-10	Visit	0
ERS1132388	ID100422	ID10042	ID100422	MZ	56	male	9/18/13	Postal	0
ERS1132421	ID107261	ID10726	ID107261	MZ	66	female	10/28/13	Visit	0
ERS1132387	ID100301	ID10030	ID100301	DZ	73	male	2013-05-10	Visit	0
ERS1132423	ID107272	ID10727	ID107272	MZ	46	female	2013-08-10	Visit	0
ERS1132422	ID107271	ID10727	ID107271	MZ	46	female	2013-08-10	Visit	0
ERS1132443	ID113001	ID11300	ID113001	MZ	64	male	2013-10-10	Visit	0
ERS1132449	ID115322	ID11532	ID115322	DZ	68	male	9/19/13	Visit	0
ERS1132444	ID113002	ID11300	ID113002	MZ	64	male	2013-10-10	Visit	0
ERS1132448	ID115321	ID11532	ID115321	DZ	68	male	9/19/13	Visit	0
ERS1132412	ID105511	ID10551	ID105511	MZ	74	male	2013-10-09	Visit	0
ERS1132531	ID115291	ID11529	ID115291	MZ	44	female	10/29/13	Visit	0
ERS1132464	ID104542	ID10454	ID104542	DZ	55	male	10/27/13	Visit	0
ERS1132509	ID111321	ID11132	ID111321	MZ	51	female	10/31/13	Visit	0
ERS1132510	ID111322	ID11132	ID111322	MZ	51	female	10/31/13	Visit	0
ERS1132489	ID107582	ID10758	ID107582	MZ	53	male	2013-05-09	Visit	0
ERS1132533	ID115871	ID11587	ID115871	MZ	52	male	2013-04-11	Visit	0
ERS1132500	ID109631	ID10963	ID109631	MZ	29	female	2013-05-11	Postal	0
ERS1132501	ID109632	ID10963	ID109632	MZ	29	female	2013-05-11	Postal	0
ERS1132452	ID100292	ID10029	ID100292	MZ	49	female	2013-06-11	Visit	0
ERS1132451	ID100291	ID10029	ID100291	MZ	49	female	2013-06-11	Visit	0
ERS1132519	ID112741	ID11274	ID112741	MZ	37	female	2013-06-11	Postal	0
ERS1132475	ID105451	ID10545	ID105451	MZ	39	female	2013-06-11	Visit	0
ERS1132524	ID113311	ID11331	ID113311	MZ	28	female	2013-11-11	Visit	0
ERS1132525	ID113312	ID11331	ID113312	MZ	28	female	2013-11-11	Visit	0
ERS1132507	ID111241	ID11124	ID111241	MZ	56	female	2013-11-11	Visit	0
ERS1132508	ID111242	ID11124	ID111242	MZ	56	female	2013-12-11	Visit	0
ERS1132484	ID106461	ID10646	ID106461	MZ	70	female	2013-11-11	Postal	0
ERS1132522	ID113111	ID11311	ID113111	MZ	73	female	2013-11-11	Visit	0
ERS1132523	ID113112	ID11311	ID113112	MZ	73	female	2013-11-11	Visit	0
ERS1132600	ID113142	ID11314	ID113142	MZ	31	female	2013-12-11	Visit	0
ERS1132587	ID110731	ID11073	ID110731	DZ	60	female	2013-11-11	Visit	0
ERS1132579	ID107511	ID10751	ID107511	MZ	64	male	11/17/13	Visit	0
ERS1132551	ID102661	ID10266	ID102661	MZ	55	male	11/18/13	Visit	0
ERS1132570	ID105442	ID10544	ID105442	MZ	63	female	11/18/13	Visit	0
ERS1132569	ID105441	ID10544	ID105441	MZ	63	female	11/19/13	Visit	0
ERS1132599	ID113092	ID11309	ID113092	DZ	41	female	11/20/13	Visit	0
ERS1132598	ID113091	ID11309	ID113091	DZ	41	female	11/20/13	Visit	0
ERS1132561	ID103141	ID10314	ID103141	MZ	50	female	11/20/13	Visit	0
ERS1132556	ID102961	ID10296	ID102961	MZ	28	female	11/19/13	Postal	0
ERS1132575	ID106581	ID10658	ID106581	MZ	56	male	11/25/13	Visit	0
ERS1132576	ID106582	ID10658	ID106582	MZ	56	male	11/25/13	Visit	0
ERS1132602	ID113322	ID11332	ID113322	MZ	21	female	11/26/13	Visit	0
ERS1132586	ID110162	ID11016	ID110162	MZ	55	female	11/25/13	Visit	0
ERS1132585	ID110161	ID11016	ID110161	MZ	55	female	11/26/13	Visit	0
ERS1132601	ID113321	ID11332	ID113321	MZ	21	female	11/28/13	Postal	0
ERS1132614	ID100262	ID10026	ID100262	MZ	40	male	2013-12-12	Visit	0
ERS1132622	ID104012	ID10401	ID104012	MZ	66	female	2013-07-12	Visit	0
ERS1132613	ID100261	ID10026	ID100261	MZ	40	male	2013-12-12	Visit	0
ERS1132649	ID115191	ID11519	ID115191	DZ	61	male	2013-12-12	Visit	0
ERS1132617	ID102652	ID10265	ID102652	MZ	59	male	12/13/13	Visit	0
ERS1132637	ID113012	ID11301	ID113012	MZ	62	male	12/16/13	Visit	0
ERS1132636	ID113011	ID11301	ID113011	MZ	62	male	12/15/13	Visit	0
ERS1132645	ID114232	ID11423	ID114232	MZ	33	female	12/15/13	Visit	0
ERS1132646	ID114241	ID11424	ID114241	MZ	66	male	12/15/13	Visit	0
ERS1132652	ID115231	ID11523	ID115231	MZ	48	female	12/16/13	Visit	0
ERS1132615	ID100321	ID10032	ID100321	MZ	43	female	12/17/13	Visit	0
ERS1132638	ID113131	ID11313	ID113131	MZ	35	female	12/17/13	Visit	0
ERS1132650	ID115221	ID11522	ID115221	MZ	35	female	12/17/13	Visit	0
ERS1132639	ID113132	ID11313	ID113132	MZ	35	female	12/17/13	Visit	0
ERS1132651	ID115222	ID11522	ID115222	MZ	35	female	12/15/13	Visit	0
ERS1132678	ID104182	ID10418	ID104182	DZ	40	female	2013-03-12	Visit	0
ERS1132699	ID111041	ID11104	ID111041	MZ	64	male	2013-02-12	Postal	0
ERS1132701	ID112111	ID11211	ID112111	MZ	58	male	2013-04-12	Visit	0
ERS1132670	ID102831	ID10283	ID102831	MZ	38	male	2013-06-12	Visit	0
ERS1132671	ID102832	ID10283	ID102832	MZ	38	male	2013-05-12	Visit	0
ERS1132664	ID100652	ID10065	ID100652	MZ	31	female	2013-08-12	Visit	0
ERS1132684	ID105371	ID10537	ID105371	MZ	60	female	2014-09-01	Visit	0
ERS1132723	ID113251	ID11325	ID113251	MZ	41	female	2014-10-01	Visit	0
ERS1132716	ID112972	ID11297	ID112972	MZ	66	male	2013-02-12	Visit	0
ERS1132717	ID112981	ID11298	ID112981	MZ	44	male	1/23/14	Visit	0
ERS1132662	ID100612	ID10061	ID100612	DZ	58	female	1/26/14	Visit	0
ERS1132710	ID112272	ID11227	ID112272	MZ	38	male	1/29/14	Visit	0
ERS1132709	ID112271	ID11227	ID112271	MZ	38	male	1/29/14	Visit	0
ERS1132679	ID104251	ID10425	ID104251	MZ	48	female	1/29/14	Visit	0
ERS1132722	ID113171	ID11317	ID113171	MZ	38	female	2014-02-02	Visit	0
ERS1132715	ID112971	ID11297	ID112971	MZ	66	male	2013-02-12	Visit	0
ERS1132726	ID113262	ID11326	ID113262	DZ	66	female	1/30/14	Visit	0
ERS1132712	ID112312	ID11231	ID112312	MZ	25	male	2014-05-02	Visit	0
ERS1132711	ID112311	ID11231	ID112311	MZ	25	male	2014-05-02	Visit	0
ERS1132705	ID112251	ID11225	ID112251	MZ	55	male	2014-06-02	Visit	0
ERS1132706	ID112252	ID11225	ID112252	MZ	55	male	2014-06-02	Visit	0
ERS1132708	ID112262	ID11226	ID112262	DZ	26	male	2014-09-02	Visit	0
ERS1132707	ID112261	ID11226	ID112261	DZ	26	male	2014-10-02	Visit	0
ERS1132680	ID104252	ID10425	ID104252	MZ	48	female	2014-12-02	Visit	0
ERS1132729	ID113291	ID11329	ID113291	MZ	52	female	2/14/14	Visit	0
ERS1132674	ID104081	ID10408	ID104081	DZ	58	male	11/29/13	Visit	0
ERS1132700	ID111841	ID11184	ID111841	MZ	54	female	2/16/14	Visit	0
ERS1132810	ID113122	ID11312	ID113122	MZ	38	female	2/19/14	Visit	0
ERS1132781	ID107541	ID10754	ID107541	MZ	50	male	2/21/14	Visit	0
ERS1132782	ID107542	ID10754	ID107542	MZ	50	male	2/21/14	Visit	0
ERS1132775	ID105481	ID10548	ID105481	MZ	41	female	2/21/14	Visit	0
ERS1132802	ID111302	ID11130	ID111302	MZ	50	male	2/17/14	Visit	0
ERS1132806	ID112192	ID11219	ID112192	MZ	41	female	2/27/14	Visit	0
ERS1132805	ID112191	ID11219	ID112191	MZ	41	female	2/27/14	Visit	0
ERS1132801	ID111301	ID11130	ID111301	MZ	50	male	2/14/14	Visit	0
ERS1132799	ID111252	ID11125	ID111252	DZ	50	female	2/26/14	Visit	0
ERS1132745	ID101051	ID10105	ID101051	MZ	62	female	2/28/14	Visit	0
ERS1132746	ID101052	ID10105	ID101052	MZ	62	female	2/27/14	Visit	0
ERS1132794	ID111211	ID11121	ID111211	MZ	54	male	2014-02-03	Visit	0
ERS1132783	ID109651	ID10965	ID109651	MZ	56	female	2014-02-03	Visit	0
ERS1132788	ID110631	ID11063	ID110631	DZ	63	male	2014-05-03	Visit	0
ERS1132789	ID110632	ID11063	ID110632	DZ	63	male	2014-05-03	Visit	0
ERS1132800	ID111291	ID11129	ID111291	MZ	49	male	2014-06-03	Visit	0
ERS1132763	ID104311	ID10431	ID104311	MZ	45	female	2014-09-03	Visit	0
ERS1132764	ID104312	ID10431	ID104312	MZ	45	female	2014-09-03	Visit	0
ERS1132796	ID111221	ID11122	ID111221	MZ	67	male	2014-11-03	Visit	0
ERS1132807	ID112281	ID11228	ID112281	MZ	48	female	3/14/14	Visit	0
ERS1132808	ID112282	ID11228	ID112282	MZ	48	female	3/14/14	Visit	0
ERS1132762	ID104262	ID10426	ID104262	MZ	46	female	4/13/14	Visit	0
ERS1132774	ID105472	ID10547	ID105472	MZ	63	male	3/17/14	Visit	0
ERS1132842	ID105471	ID10547	ID105471	MZ	63	male	3/17/14	Visit	0
ERS1132879	ID111891	ID11189	ID111891	MZ	60	male	3/21/14	Visit	0
ERS1132883	ID113341	ID11334	ID113341	DZ	65	female	3/27/14	Visit	0
ERS1132884	ID113342	ID11334	ID113342	DZ	65	female	3/26/14	Visit	0
ERS1132836	ID104352	ID10435	ID104352	DZ	46	female	3/26/14	Visit	0
ERS1132820	ID100411	ID10041	ID100411	MZ	55	male	3/31/14	Visit	0
ERS1132888	ID115242	ID11524	ID115242	MZ	29	male	2014-01-04	Visit	0
ERS1132887	ID115241	ID11524	ID115241	MZ	29	male	1/31/14	Visit	0
ERS1132870	ID110762	ID11076	ID110762	MZ	58	female	2014-04-04	Visit	0
ERS1132869	ID110761	ID11076	ID110761	MZ	58	female	2014-04-04	Visit	0
ERS1132837	ID104361	ID10436	ID104361	MZ	38	female	2014-07-04	Visit	0
ERS1132830	ID104241	ID10424	ID104241	MZ	59	female	3/18/14	Visit	0
ERS1132839	ID104531	ID10453	ID104531	DZ	64	male	2014-06-04	Visit	0
ERS1132831	ID104271	ID10427	ID104271	MZ	77	male	2014-07-04	Visit	0
ERS1132895	ID115581	ID11558	ID115581	MZ	64	female	2014-08-04	Visit	0
ERS1132896	ID115582	ID11558	ID115582	MZ	64	female	2014-08-04	Visit	0
ERS1132891	ID115372	ID11537	ID115372	MZ	62	male	2014-07-04	Visit	0
ERS1132890	ID115371	ID11537	ID115371	MZ	62	male	2014-08-04	Visit	0
ERS1132878	ID111831	ID11183	ID111831	MZ	48	female	2014-11-04	Visit	0
ERS1132822	ID100442	ID10044	ID100442	MZ	73	male	4/15/14	Visit	0
ERS1132821	ID100441	ID10044	ID100441	MZ	73	male	4/14/14	Visit	0
ERS1132962	ID114361	ID11436	ID114361	MZ	64	female	4/22/14	Visit	0
ERS1132963	ID114362	ID11436	ID114362	MZ	64	female	4/22/14	Visit	0
ERS1132968	ID115541	ID11554	ID115541	DZ	29	female	4/22/14	Visit	0
ERS1132907	ID104141	ID10414	ID104141	DZ	46	male	4/23/14	Visit	0
ERS1132908	ID104142	ID10414	ID104142	DZ	46	male	4/24/14	Visit	0
ERS1132930	ID110141	ID11014	ID110141	MZ	36	male	4/23/14	Visit	0
ERS1132931	ID110142	ID11014	ID110142	MZ	36	male	4/25/14	Visit	0
ERS1132905	ID101621	ID10162	ID101621	MZ	38	female	4/25/14	Visit	0
ERS1132953	ID113282	ID11328	ID113282	MZ	36	male	4/27/14	Visit	0
ERS1132952	ID113281	ID11328	ID113281	MZ	36	male	4/28/14	Visit	0
ERS1132945	ID112301	ID11230	ID112301	MZ	32	female	4/29/14	Postal	0
ERS1132944	ID112292	ID11229	ID112292	DZ	48	female	4/29/14	Visit	0
ERS1132943	ID112291	ID11229	ID112291	DZ	48	female	4/29/14	Visit	0
ERS1132946	ID112321	ID11232	ID112321	DZ	65	female	2014-07-05	Visit	0
ERS1132947	ID112322	ID11232	ID112322	DZ	65	female	2014-06-05	Visit	0
ERS1132899	ID100481	ID10048	ID100481	MZ	58	male	2014-07-05	Visit	0
ERS1132915	ID105461	ID10546	ID105461	MZ	47	female	4/17/14	Visit	0
ERS1132911	ID104202	ID10420	ID104202	DZ	43	female	5/14/14	Visit	0
ERS1132916	ID105462	ID10546	ID105462	MZ	47	female	4/19/14	Visit	0
ERS1132910	ID104201	ID10420	ID104201	DZ	43	female	5/13/14	Visit	0
ERS1132909	ID104161	ID10416	ID104161	DZ	61	female	5/18/14	Visit	0
ERS1132961	ID114332	ID11433	ID114332	MZ	45	male	5/20/14	Visit	0
ERS1132960	ID114331	ID11433	ID114331	MZ	45	male	5/18/14	Visit	0
ERS1132949	ID112342	ID11234	ID112342	MZ	20	male	5/21/14	Visit	0
ERS1132967	ID115181	ID11518	ID115181	MZ	62	female	4/22/14	Visit	0
ERS1132948	ID112341	ID11234	ID112341	MZ	20	male	5/20/14	Visit	0
ERS1132935	ID110682	ID11068	ID110682	MZ	81	female	5/20/14	Visit	0
ERS1132934	ID110681	ID11068	ID110681	MZ	81	female	5/21/14	Visit	0
ERS1132939	ID111271	ID11127	ID111271	DZ	56	female	5/23/14	Visit	0
ERS1132929	ID110112	ID11011	ID110112	MZ	30	male	5/22/14	Visit	0
ERS1133030	ID115341	ID11534	ID115341	MZ	61	female	5/26/14	Visit	0
ERS1133031	ID115342	ID11534	ID115342	MZ	61	female	5/27/14	Visit	0
ERS1133003	ID110071	ID11007	ID110071	MZ	51	female	5/26/14	Visit	0
ERS1132997	ID107251	ID10725	ID107251	MZ	33	female	6/19/14	Visit	0
ERS1133019	ID112332	ID11233	ID112332	MZ	29	male	5/29/14	Visit	0
ERS1133033	ID115522	ID11552	ID115522	MZ	56	female	2014-03-06	Visit	0
ERS1133032	ID115521	ID11552	ID115521	MZ	56	female	2014-03-06	Visit	0
ERS1133016	ID111641	ID11164	ID111641	MZ	52	female	6/23/14	Visit	0
ERS1133013	ID111102	ID11110	ID111102	MZ	53	female	2014-06-06	Visit	0
ERS1133012	ID111101	ID11110	ID111101	MZ	53	female	2014-06-06	Visit	0
ERS1133027	ID115212	ID11521	ID115212	MZ	68	male	2014-04-06	Visit	0
ERS1133026	ID115211	ID11521	ID115211	MZ	68	male	2014-10-06	Visit	0
ERS1133001	ID109981	ID10998	ID109981	MZ	83	female	2014-11-06	Visit	0
ERS1132999	ID109681	ID10968	ID109681	MZ	24	male	2014-12-06	Visit	0
ERS1133000	ID109682	ID10968	ID109682	MZ	24	male	2014-12-06	Visit	0
ERS1133008	ID111081	ID11108	ID111081	MZ	59	female	6/16/14	Visit	0
ERS1133009	ID111082	ID11108	ID111082	MZ	59	female	6/16/14	Visit	0
ERS1133034	ID115531	ID11553	ID115531	DZ	60	female	6/16/14	Visit	0
ERS1133010	ID111091	ID11109	ID111091	MZ	30	female	6/15/14	Visit	0
ERS1132991	ID105391	ID10539	ID105391	MZ	56	female	6/16/14	Visit	0
ERS1133004	ID110111	ID11011	ID110111	MZ	30	male	5/22/14	Visit	0
ERS1132983	ID102882	ID10288	ID102882	MZ	58	female	6/17/14	Visit	0
ERS1133044	ID101501	ID10150	ID101501	MZ	46	female	6/27/14	Visit	0
ERS1133045	ID101502	ID10150	ID101502	MZ	46	female	6/27/14	Visit	0
ERS1133060	ID108461	ID10846	ID108461	MZ	33	female	6/27/14	Visit	0
ERS1133061	ID108462	ID10846	ID108462	MZ	33	female	6/27/14	Visit	0
ERS1133047	ID101632	ID10163	ID101632	MZ	65	female	6/27/14	Visit	0
ERS1133067	ID109672	ID10967	ID109672	MZ	30	female	2014-01-07	Visit	0
ERS1133066	ID109671	ID10967	ID109671	MZ	30	female	2014-01-07	Visit	0
ERS1133065	ID109661	ID10966	ID109661	DZ	60	female	2014-01-07	Visit	0
ERS1133062	ID108691	ID10869	ID108691	DZ	60	female	2014-03-07	Visit	0
ERS1133059	ID108421	ID10842	ID108421	MZ	29	female	2014-04-07	Visit	0
ERS1133075	ID111062	ID11106	ID111062	MZ	28	female	2014-06-07	Visit	0
ERS1133074	ID111061	ID11106	ID111061	MZ	28	female	2014-05-07	Visit	0
ERS1130258	ID102401	ID10240	ID102401	MZ	62	female	2014-10-07	Visit	0
ERS1130320	ID115991	ID11599	ID115991	DZ	69	female	2014-09-07	Visit	0
ERS1130306	ID110391	ID11039	ID110391	MZ	39	male	2014-08-07	Visit	0
ERS1130305	ID110372	ID11037	ID110372	MZ	53	female	2014-11-07	Visit	0
ERS1130252	ID102071	ID10207	ID102071	DZ	54	female	7/13/14	Visit	0
ERS1130288	ID109142	ID10914	ID109142	MZ	49	female	7/14/14	Visit	0
ERS1130287	ID109141	ID10914	ID109141	MZ	49	female	7/14/14	Visit	0
ERS1130261	ID104961	ID10496	ID104961	DZ	67	female	7/13/14	Visit	0
ERS1130271	ID106811	ID10681	ID106811	MZ	23	female	2014-09-07	Visit	0
ERS1130312	ID111722	ID11172	ID111722	MZ	71	female	7/13/14	Visit	0
ERS1130311	ID111721	ID11172	ID111721	MZ	71	female	7/14/14	Visit	0
ERS1130315	ID113511	ID11351	ID113511	DZ	75	female	7/15/14	Visit	0
ERS1130310	ID111661	ID11166	ID111661	DZ	77	female	7/15/14	Visit	0
ERS1130298	ID109511	ID10951	ID109511	MZ	78	male	2014-01-07	Visit	0
ERS1130299	ID109512	ID10951	ID109512	MZ	78	male	7/15/14	Visit	0
ERS1130250	ID101431	ID10143	ID101431	MZ	37	female	7/17/14	Visit	0
ERS1130317	ID115931	ID11593	ID115931	DZ	77	female	2014-08-07	Visit	0
ERS1130277	ID107452	ID10745	ID107452	MZ	62	female	7/21/14	Visit	0
ERS1130276	ID107451	ID10745	ID107451	MZ	62	female	7/21/14	Visit	0
ERS1130260	ID104881	ID10488	ID104881	DZ	76	female	7/22/14	Visit	0
ERS1130318	ID115932	ID11593	ID115932	DZ	77	female	2014-06-07	Visit	0
ERS1130281	ID108001	ID10800	ID108001	MZ	58	female	7/22/14	Postal	0
ERS1130278	ID107661	ID10766	ID107661	MZ	60	male	7/23/14	Visit	0
ERS1130279	ID107662	ID10766	ID107662	MZ	60	male	7/22/14	Visit	0
ERS1130269	ID106011	ID10601	ID106011	DZ	59	female	7/21/14	Visit	0
ERS1130270	ID106012	ID10601	ID106012	DZ	59	female	7/25/14	Visit	0
ERS1130268	ID105872	ID10587	ID105872	MZ	32	female	7/24/14	Visit	0
ERS1130267	ID105871	ID10587	ID105871	MZ	32	female	7/23/14	Visit	0
ERS1130247	ID100082	ID10008	ID100082	MZ	48	female	7/23/14	Visit	0
ERS1130246	ID100081	ID10008	ID100081	MZ	48	female	7/24/14	Visit	0
ERS1130266	ID105862	ID10586	ID105862	MZ	43	female	7/22/14	Visit	0
ERS1130265	ID105861	ID10586	ID105861	MZ	43	female	7/24/14	Visit	0
ERS1130274	ID107421	ID10742	ID107421	MZ	71	female	7/28/14	Visit	0
ERS1130275	ID107422	ID10742	ID107422	MZ	71	female	7/28/14	Visit	0
ERS1130257	ID102282	ID10228	ID102282	MZ	68	female	2014-08-07	Visit	0
ERS1130264	ID105822	ID10582	ID105822	DZ	64	female	7/26/14	Visit	0
ERS1130289	ID109171	ID10917	ID109171	MZ	55	female	7/28/14	Visit	0
ERS1130290	ID109172	ID10917	ID109172	MZ	55	female	7/28/14	Visit	0
ERS1130262	ID105021	ID10502	ID105021	MZ	46	female	7/29/14	Visit	0
ERS1130297	ID109421	ID10942	ID109421	DZ	57	male	7/29/14	Visit	0
ERS1130256	ID102281	ID10228	ID102281	MZ	68	female	2014-08-07	Visit	0
ERS1133089	ID104521	ID10452	ID104521	MZ	32	female	11/30/12	Visit	0
ERS1133096	ID106651	ID10665	ID106651	MZ	65	female	3/13/13	Visit	0
ERS1133088	ID104471	ID10447	ID104471	DZ	58	female	2013-05-02	Visit	0
ERS1130368	ID110702	ID11070	ID110702	MZ	76	female	7/30/14	Visit	0
ERS1130383	ID112571	ID11257	ID112571	DZ	70	female	2014-04-08	Visit	0
ERS1130384	ID112572	ID11257	ID112572	DZ	70	female	2014-03-08	Visit	0
ERS1130367	ID110701	ID11070	ID110701	MZ	76	female	7/29/14	Visit	0
ERS1130387	ID113941	ID11394	ID113941	MZ	71	female	2014-05-08	Visit	0
ERS1130388	ID113942	ID11394	ID113942	MZ	71	female	2014-05-08	Visit	0
ERS1130376	ID111771	ID11177	ID111771	MZ	74	female	2014-04-08	Visit	0
ERS1130377	ID111772	ID11177	ID111772	MZ	74	female	2014-03-08	Visit	0
ERS1130371	ID111591	ID11159	ID111591	MZ	60	female	2014-04-08	Visit	0
ERS1130347	ID108041	ID10804	ID108041	MZ	60	female	7/31/14	Visit	0
ERS1130366	ID110672	ID11067	ID110672	DZ	69	female	2014-06-08	Visit	0
ERS1130330	ID102091	ID10209	ID102091	MZ	56	female	2014-07-08	Visit	0
ERS1130369	ID110861	ID11086	ID110861	MZ	57	female	2014-06-08	Visit	0
ERS1130391	ID115671	ID11567	ID115671	MZ	55	female	2014-07-08	Visit	0
ERS1130382	ID112431	ID11243	ID112431	DZ	56	female	2014-08-08	Visit	0
ERS1130361	ID109472	ID10947	ID109472	MZ	64	female	2014-11-08	Visit	0
ERS1130360	ID109471	ID10947	ID109471	MZ	64	female	2014-11-08	Visit	0
ERS1130332	ID102311	ID10231	ID102311	MZ	58	female	2014-11-08	Visit	0
ERS1130326	ID101331	ID10133	ID101331	MZ	74	female	2014-11-08	Visit	0
ERS1130343	ID107191	ID10719	ID107191	DZ	69	female	2014-12-08	Visit	0
ERS1130359	ID109252	ID10925	ID109252	MZ	69	female	2014-12-08	Visit	0
ERS1130324	ID101101	ID10110	ID101101	DZ	62	female	2014-12-08	Visit	0
ERS1130325	ID101102	ID10110	ID101102	DZ	62	female	2014-11-08	Visit	0
ERS1130379	ID111902	ID11190	ID111902	MZ	70	female	2014-12-08	Postal	0
ERS1130378	ID111901	ID11190	ID111901	MZ	70	female	2014-12-08	Postal	0
ERS1130363	ID109482	ID10948	ID109482	MZ	58	female	8/14/14	Visit	0
ERS1130362	ID109481	ID10948	ID109481	MZ	58	female	8/14/14	Visit	0
ERS1130323	ID101062	ID10106	ID101062	MZ	60	female	8/13/14	Visit	0
ERS1130342	ID106961	ID10696	ID106961	DZ	38	female	8/14/14	Visit	0
ERS1130336	ID103641	ID10364	ID103641	MZ	34	female	2014-12-08	Visit	0
ERS1130357	ID109241	ID10924	ID109241	MZ	56	male	8/17/14	Visit	0
ERS1130358	ID109242	ID10924	ID109242	MZ	56	male	8/17/14	Visit	0
ERS1130373	ID111711	ID11171	ID111711	MZ	48	female	8/18/14	Visit	0
ERS1130356	ID109191	ID10919	ID109191	DZ	60	female	8/18/14	Visit	0
ERS1130380	ID111981	ID11198	ID111981	MZ	57	female	8/18/14	Postal	0
ERS1130381	ID111982	ID11198	ID111982	MZ	57	female	8/17/14	Postal	0
ERS1130322	ID100161	ID10016	ID100161	DZ	81	female	8/17/14	Visit	0
ERS1130334	ID103571	ID10357	ID103571	MZ	63	female	8/19/14	Visit	0
ERS1130335	ID103572	ID10357	ID103572	MZ	63	female	8/17/14	Visit	0
ERS1130355	ID109161	ID10916	ID109161	MZ	25	female	8/18/14	Visit	0
ERS1130333	ID102351	ID10235	ID102351	DZ	68	female	8/18/14	Visit	0
ERS1130390	ID115061	ID11506	ID115061	DZ	53	female	8/19/14	Visit	0
ERS1130344	ID107501	ID10750	ID107501	DZ	53	female	8/20/14	Visit	0
ERS1130385	ID113841	ID11384	ID113841	MZ	70	female	8/19/14	Visit	0
ERS1130386	ID113842	ID11384	ID113842	MZ	70	female	8/19/14	Visit	0
ERS1130389	ID114991	ID11499	ID114991	MZ	70	female	8/20/14	Visit	0
ERS1130395	ID101091	ID10109	ID101091	DZ	56	female	8/20/14	Visit	0
ERS1130432	ID107982	ID10798	ID107982	MZ	66	female	8/27/14	Visit	0
ERS1130446	ID111462	ID11146	ID111462	MZ	51	female	8/28/14	Visit	0
ERS1130426	ID106152	ID10615	ID106152	DZ	61	male	8/22/14	Visit	0
ERS1130420	ID104922	ID10492	ID104922	MZ	82	female	2014-01-09	Visit	0
ERS1130397	ID101272	ID10127	ID101272	MZ	78	female	2014-01-09	Visit	0
ERS1130462	ID115951	ID11595	ID115951	DZ	78	female	2014-02-09	Visit	0
ERS1130459	ID113911	ID11391	ID113911	MZ	56	female	2014-03-09	Visit	0
ERS1130448	ID111762	ID11176	ID111762	DZ	65	female	2014-01-09	Visit	0
ERS1130445	ID111451	ID11145	ID111451	DZ	67	female	2014-08-09	Visit	0
ERS1130428	ID106841	ID10684	ID106841	MZ	63	male	8/21/14	Visit	0
ERS1130422	ID105012	ID10501	ID105012	MZ	49	female	2014-08-09	Visit	0
ERS1130443	ID110472	ID11047	ID110472	MZ	51	male	2014-11-09	Visit	0
ERS1130393	ID101021	ID10102	ID101021	MZ	46	female	9/15/14	Visit	0
ERS1130434	ID108262	ID10826	ID108262	DZ	65	female	9/14/14	Postal	0
ERS1130415	ID103991	ID10399	ID103991	MZ	43	female	9/16/14	Postal	0
ERS1130410	ID103621	ID10362	ID103621	MZ	65	female	9/17/14	Visit	0
ERS1130409	ID103601	ID10360	ID103601	MZ	70	female	9/17/14	Visit	0
ERS1130399	ID101322	ID10132	ID101322	MZ	76	female	9/17/14	Visit	0
ERS1130416	ID103992	ID10399	ID103992	MZ	43	female	9/18/14	Postal	0
ERS1130400	ID101371	ID10137	ID101371	MZ	39	female	9/18/14	Visit	0
ERS1130418	ID104561	ID10456	ID104561	MZ	48	female	9/19/14	Visit	0
ERS1130406	ID102522	ID10252	ID102522	DZ	69	female	9/22/14	Visit	0
ERS1130394	ID101071	ID10107	ID101071	DZ	67	female	9/23/14	Visit	0
ERS1130460	ID113921	ID11392	ID113921	MZ	77	female	9/25/14	Visit	0
ERS1130461	ID113931	ID11393	ID113931	DZ	75	female	8/25/14	Visit	0
ERS1130452	ID113531	ID11353	ID113531	DZ	49	female	9/24/14	Visit	0
ERS1130457	ID113851	ID11385	ID113851	DZ	71	female	9/25/14	Visit	0
ERS1130398	ID101312	ID10131	ID101312	MZ	76	female	9/29/14	Visit	0
ERS1130442	ID110412	ID11041	ID110412	MZ	64	female	9/29/14	Visit	0
ERS1130392	ID100162	ID10016	ID100162	DZ	81	female	8/25/14	Postal	0
ERS1130431	ID107491	ID10749	ID107491	MZ	71	female	8/26/14	Visit	0
ERS1130490	ID106171	ID10617	ID106171	MZ	48	female	8/26/14	Postal	0
ERS1130498	ID107981	ID10798	ID107981	MZ	66	female	8/27/14	Visit	0
ERS1130514	ID111461	ID11146	ID111461	MZ	52	female	8/31/14	Visit	0
ERS1130487	ID105841	ID10584	ID105841	DZ	26	female	2014-01-09	Visit	0
ERS1130483	ID104921	ID10492	ID104921	MZ	82	female	2014-01-09	Visit	0
ERS1130467	ID101271	ID10127	ID101271	MZ	78	female	2014-01-09	Visit	0
ERS1130504	ID109302	ID10930	ID109302	MZ	76	female	2014-02-09	Visit	0
ERS1130479	ID103932	ID10393	ID103932	MZ	68	female	2014-02-09	Visit	0
ERS1130531	ID115952	ID11595	ID115952	DZ	78	female	2014-02-09	Visit	0
ERS1130525	ID113912	ID11391	ID113912	MZ	56	female	2014-03-09	Visit	0
ERS1130530	ID115751	ID11575	ID115751	DZ	75	female	2014-04-09	Visit	0
ERS1130475	ID103431	ID10343	ID103431	MZ	71	female	2014-07-09	Visit	0
ERS1130516	ID111742	ID11174	ID111742	MZ	46	female	2014-09-09	Visit	0
ERS1130485	ID105011	ID10501	ID105011	MZ	49	female	2014-07-09	Visit	0
ERS1130528	ID114811	ID11481	ID114811	MZ	80	female	2014-09-09	Postal	0
ERS1130510	ID110471	ID11047	ID110471	MZ	51	male	2014-12-09	Visit	0
ERS1130491	ID106842	ID10684	ID106842	MZ	63	male	8/22/14	Visit	0
ERS1130935	ID102371	ID10237	ID102371	MZ	74	female	2014-09-09	Visit	0
ERS1130943	ID113871	ID11387	ID113871	MZ	70	female	2014-12-09	Visit	0
ERS1130938	ID108261	ID10826	ID108261	DZ	65	female	9/13/14	Postal	0
ERS1130939	ID109351	ID10935	ID109351	MZ	49	female	9/15/14	Postal	0
ERS1130936	ID103001	ID10300	ID103001	MZ	83	female	9/15/14	Visit	0
ERS1130499	ID108101	ID10810	ID108101	DZ	66	female	8/25/14	Visit	0
ERS1130941	ID112641	ID11264	ID112641	MZ	76	female	9/13/14	Visit	0
ERS1130477	ID103622	ID10362	ID103622	MZ	65	female	9/17/14	Visit	0
ERS1130488	ID105971	ID10597	ID105971	DZ	73	female	9/17/14	Visit	0
ERS1130470	ID101372	ID10137	ID101372	MZ	39	female	9/18/14	Visit	0
ERS1130513	ID110691	ID11069	ID110691	MZ	64	female	8/25/14	Visit	0
ERS1130481	ID103981	ID10398	ID103981	MZ	52	female	9/19/14	Visit	0
ERS1130492	ID106942	ID10694	ID106942	MZ	41	female	9/20/14	Visit	0
ERS1130474	ID102521	ID10252	ID102521	DZ	69	female	9/21/14	Visit	0
ERS1130500	ID108191	ID10819	ID108191	MZ	61	female	9/21/14	Visit	0
ERS1130465	ID101072	ID10107	ID101072	DZ	67	female	9/22/14	Visit	0
ERS1130515	ID111531	ID11153	ID111531	MZ	63	male	9/24/14	Visit	0
ERS1130526	ID113922	ID11392	ID113922	MZ	77	female	9/23/14	Visit	0
ERS1130519	ID113532	ID11353	ID113532	DZ	49	female	9/24/14	Visit	0
ERS1130501	ID108621	ID10862	ID108621	DZ	63	female	9/24/14	Visit	0
ERS1130494	ID107031	ID10703	ID107031	MZ	71	female	9/25/14	Visit	0
ERS1130524	ID113852	ID11385	ID113852	DZ	71	female	9/25/14	Visit	0
ERS1130466	ID101251	ID10125	ID101251	MZ	79	female	9/29/14	Visit	0
ERS1130468	ID101311	ID10131	ID101311	MZ	76	female	9/29/14	Visit	0
ERS1130509	ID110411	ID11041	ID110411	MZ	64	female	9/29/14	Visit	0
ERS1130529	ID115021	ID11502	ID115021	DZ	75	female	9/29/14	Postal	0
ERS1130464	ID101031	ID10103	ID101031	DZ	55	female	9/30/14	Visit	0
ERS1130523	ID113681	ID11368	ID113681	DZ	70	female	9/29/14	Visit	0
ERS1130527	ID114661	ID11466	ID114661	DZ	65	female	9/30/14	Visit	0
ERS1130511	ID110501	ID11050	ID110501	MZ	44	male	9/30/14	Visit	0
ERS1130520	ID113581	ID11358	ID113581	MZ	49	male	9/30/14	Visit	0
ERS1130505	ID109312	ID10931	ID109312	MZ	64	female	2014-01-10	Visit	0
ERS1130493	ID107002	ID10700	ID107002	MZ	71	male	9/29/14	Visit	0
ERS1130497	ID107492	ID10749	ID107492	MZ	71	female	8/26/14	Visit	0
ERS1131013	ID113861	ID11386	ID113861	MZ	78	female	2014-03-10	Visit	0
ERS1131018	ID114951	ID11495	ID114951	DZ	72	female	2014-04-10	Visit	0
ERS1130976	ID107041	ID10704	ID107041	MZ	40	female	2014-07-10	Visit	0
ERS1130966	ID104772	ID10477	ID104772	MZ	61	female	2014-07-10	Visit	0
ERS1130978	ID107162	ID10716	ID107162	MZ	68	female	2014-08-10	Visit	0
ERS1130977	ID107161	ID10716	ID107161	MZ	68	female	2014-08-10	Visit	0
ERS1131008	ID113501	ID11350	ID113501	MZ	62	female	2014-09-10	Visit	0
ERS1130983	ID108121	ID10812	ID108121	MZ	63	female	2014-12-10	Visit	0
ERS1130984	ID108122	ID10812	ID108122	MZ	63	female	2014-12-10	Visit	0
ERS1130960	ID102631	ID10263	ID102631	MZ	66	female	2014-11-10	Visit	0
ERS1130989	ID108251	ID10825	ID108251	MZ	66	female	2014-11-10	Visit	0
ERS1131010	ID113572	ID11357	ID113572	MZ	79	female	2014-12-10	Visit	0
ERS1131009	ID113571	ID11357	ID113571	MZ	79	female	10/15/14	Visit	0
ERS1131015	ID114692	ID11469	ID114692	DZ	63	female	10/15/14	Visit	0
ERS1131014	ID114691	ID11469	ID114691	DZ	63	female	10/15/14	Visit	0
ERS1130955	ID102411	ID10241	ID102411	DZ	71	female	10/15/14	Visit	0
ERS1131016	ID114821	ID11482	ID114821	MZ	63	female	10/15/14	Visit	0
ERS1131017	ID114822	ID11482	ID114822	MZ	63	female	10/15/14	Visit	0
ERS1130959	ID102601	ID10260	ID102601	MZ	66	female	10/13/14	Visit	0
ERS1130979	ID107401	ID10740	ID107401	MZ	58	female	10/20/14	Visit	0
ERS1130974	ID106991	ID10699	ID106991	MZ	61	female	10/19/14	Visit	0
ERS1130975	ID106992	ID10699	ID106992	MZ	61	female	10/18/14	Visit	0
ERS1130963	ID103971	ID10397	ID103971	MZ	70	female	10/19/14	Visit	0
ERS1130999	ID111501	ID11150	ID111501	MZ	67	female	10/20/14	Postal	0
ERS1131000	ID111502	ID11150	ID111502	MZ	67	female	10/20/14	Postal	0
ERS1130986	ID108182	ID10818	ID108182	MZ	59	female	10/17/14	Visit	0
ERS1130985	ID108181	ID10818	ID108181	MZ	59	female	10/17/14	Visit	0
ERS1130957	ID102471	ID10247	ID102471	DZ	66	female	10/19/14	Visit	0
ERS1130958	ID102472	ID10247	ID102472	DZ	66	female	10/20/14	Visit	0
ERS1130962	ID103501	ID10350	ID103501	DZ	69	female	2014-04-10	Visit	0
ERS1130982	ID108111	ID10811	ID108111	MZ	48	female	10/21/14	Postal	0
ERS1130967	ID105981	ID10598	ID105981	MZ	60	female	10/23/14	Visit	0
ERS1130968	ID105982	ID10598	ID105982	MZ	60	female	10/22/14	Visit	0
ERS1130991	ID108322	ID10832	ID108322	DZ	77	female	10/22/14	Visit	0
ERS1130990	ID108321	ID10832	ID108321	DZ	77	female	10/22/14	Visit	0
ERS1131002	ID112511	ID11251	ID112511	DZ	55	female	2014-05-10	Visit	0
ERS1131041	ID102571	ID10257	ID102571	MZ	57	female	10/26/14	Visit	0
ERS1131035	ID102221	ID10222	ID102221	MZ	67	female	10/27/14	Visit	0
ERS1131036	ID102222	ID10222	ID102222	MZ	67	female	10/27/14	Visit	0
ERS1131044	ID102621	ID10262	ID102621	MZ	59	female	10/28/14	Visit	0
ERS1131045	ID102622	ID10262	ID102622	MZ	59	female	10/28/14	Visit	0
ERS1131087	ID112912	ID11291	ID112912	MZ	55	female	10/27/14	Visit	0
ERS1131086	ID112911	ID11291	ID112911	MZ	55	female	10/27/14	Visit	0
ERS1131051	ID103941	ID10394	ID103941	MZ	58	female	10/24/14	Visit	0
ERS1131081	ID111741	ID11174	ID111741	MZ	46	female	10/29/14	Postal	0
ERS1131038	ID102232	ID10223	ID102232	MZ	61	female	10/29/14	Visit	0
ERS1131037	ID102231	ID10223	ID102231	MZ	61	female	10/29/14	Visit	0
ERS1131052	ID103942	ID10394	ID103942	MZ	58	female	10/24/14	Visit	0
ERS1131076	ID109521	ID10952	ID109521	MZ	45	female	10/30/14	Visit	0
ERS1131077	ID109522	ID10952	ID109522	MZ	45	female	10/29/14	Visit	0
ERS1131032	ID102102	ID10210	ID102102	DZ	56	female	10/31/14	Visit	0
ERS1131031	ID102101	ID10210	ID102101	DZ	56	female	10/31/14	Visit	0
ERS1131089	ID113542	ID11354	ID113542	MZ	60	female	2014-03-11	Visit	0
ERS1131088	ID113541	ID11354	ID113541	MZ	60	female	2014-03-11	Visit	0
ERS1131026	ID100212	ID10021	ID100212	MZ	74	female	2014-03-11	Visit	0
ERS1131025	ID100211	ID10021	ID100211	MZ	74	female	2014-02-11	Visit	0
ERS1131024	ID100131	ID10013	ID100131	MZ	60	male	2014-03-11	Visit	0
ERS1131079	ID110851	ID11085	ID110851	MZ	64	female	2014-03-11	Postal	0
ERS1131034	ID102182	ID10218	ID102182	MZ	75	female	2014-03-11	Visit	0
ERS1131033	ID102181	ID10218	ID102181	MZ	75	female	2014-03-11	Visit	0
ERS1131091	ID113881	ID11388	ID113881	DZ	48	female	2014-03-11	Visit	0
ERS1131092	ID113882	ID11388	ID113882	DZ	48	female	2014-02-11	Visit	0
ERS1131040	ID102482	ID10248	ID102482	DZ	70	female	10/24/14	Visit	0
ERS1131053	ID104761	ID10476	ID104761	MZ	52	female	2014-06-11	Visit	0
ERS1131054	ID104762	ID10476	ID104762	MZ	52	female	2014-06-11	Visit	0
ERS1131094	ID114651	ID11465	ID114651	MZ	75	male	2014-06-11	Visit	0
ERS1131027	ID101111	ID10111	ID101111	DZ	65	female	2014-06-11	Visit	0
ERS1131022	ID100071	ID10007	ID100071	MZ	63	female	2014-04-11	Visit	0
ERS1131023	ID100072	ID10007	ID100072	MZ	63	female	2014-05-11	Visit	0
ERS1131039	ID102481	ID10248	ID102481	DZ	70	female	10/25/14	Visit	0
ERS1131043	ID102612	ID10261	ID102612	MZ	59	female	2014-10-11	Visit	0
ERS1131042	ID102611	ID10261	ID102611	MZ	59	female	2014-10-11	Visit	0
ERS1131069	ID108022	ID10802	ID108022	MZ	68	male	2014-10-11	Visit	0
ERS1131063	ID106891	ID10689	ID106891	MZ	65	male	2014-10-11	Visit	0
ERS1131030	ID101381	ID10138	ID101381	DZ	45	female	2014-10-11	Visit	0
ERS1131080	ID110852	ID11085	ID110852	MZ	64	female	2014-10-11	Postal	0
ERS1131072	ID109152	ID10915	ID109152	MZ	66	female	2014-10-11	Visit	0
ERS1131071	ID109151	ID10915	ID109151	MZ	66	female	2014-10-11	Visit	0
ERS1131046	ID103461	ID10346	ID103461	MZ	75	male	2014-11-11	Visit	0
ERS1131047	ID103462	ID10346	ID103462	MZ	75	male	2014-10-11	Visit	0
ERS1130559	ID106101	ID10610	ID106101	MZ	58	female	11/13/14	Visit	0
ERS1130539	ID102261	ID10226	ID102261	MZ	62	female	11/15/14	Visit	0
ERS1130573	ID109181	ID10918	ID109181	MZ	60	male	11/18/14	Visit	0
ERS1130535	ID101341	ID10134	ID101341	DZ	82	male	2014-11-11	Visit	0
ERS1130536	ID101421	ID10142	ID101421	DZ	59	male	11/18/14	Postal	0
ERS1130566	ID108112	ID10811	ID108112	MZ	48	female	11/18/14	Postal	0
ERS1130582	ID110951	ID11095	ID110951	DZ	62	female	11/18/14	Visit	0
ERS1130574	ID110361	ID11036	ID110361	DZ	64	female	11/18/14	Visit	0
ERS1130603	ID114942	ID11494	ID114942	MZ	52	female	2014-11-11	Visit	0
ERS1130589	ID111922	ID11192	ID111922	MZ	41	female	11/20/14	Visit	0
ERS1130561	ID106902	ID10690	ID106902	DZ	44	female	11/24/14	Visit	0
ERS1130560	ID106901	ID10690	ID106901	DZ	44	female	11/24/14	Visit	0
ERS1130562	ID107061	ID10706	ID107061	MZ	63	female	11/21/14	Visit	0
ERS1130563	ID107062	ID10706	ID107062	MZ	63	female	11/22/14	Visit	0
ERS1130551	ID104871	ID10487	ID104871	MZ	84	male	11/24/14	Visit	0
ERS1130602	ID114941	ID11494	ID114941	MZ	52	female	2014-12-11	Visit	0
ERS1130579	ID110461	ID11046	ID110461	MZ	59	female	11/25/14	Visit	0
ERS1130553	ID104911	ID10491	ID104911	MZ	85	female	11/24/14	Visit	0
ERS1130594	ID112502	ID11250	ID112502	DZ	67	female	11/25/14	Visit	0
ERS1130593	ID112501	ID11250	ID112501	DZ	67	female	11/25/14	Visit	0
ERS1130569	ID108331	ID10833	ID108331	MZ	67	female	11/25/14	Visit	0
ERS1130570	ID108332	ID10833	ID108332	MZ	67	female	11/25/14	Visit	0
ERS1130549	ID104781	ID10478	ID104781	MZ	26	female	11/13/14	Visit	0
ERS1130599	ID114022	ID11402	ID114022	MZ	36	female	11/26/14	Visit	0
ERS1130598	ID114021	ID11402	ID114021	MZ	36	female	11/26/14	Visit	0
ERS1130540	ID102501	ID10250	ID102501	DZ	73	female	11/27/14	Visit	0
ERS1130544	ID103401	ID10340	ID103401	MZ	62	male	11/30/14	Visit	0
ERS1130543	ID102982	ID10298	ID102982	DZ	76	female	11/29/14	Visit	0
ERS1130542	ID102981	ID10298	ID102981	DZ	76	female	11/29/14	Visit	0
ERS1130550	ID104782	ID10478	ID104782	MZ	26	female	11/13/14	Visit	0
ERS1130558	ID106031	ID10603	ID106031	DZ	72	female	11/30/14	Postal	0
ERS1130537	ID102251	ID10225	ID102251	DZ	48	female	2014-01-12	Visit	0
ERS1130538	ID102252	ID10225	ID102252	DZ	48	female	2014-02-12	Visit	0
ERS1130552	ID104901	ID10490	ID104901	DZ	75	female	2014-02-12	Visit	0
ERS1130568	ID108162	ID10816	ID108162	MZ	55	female	11/30/14	Visit	0
ERS1130554	ID104971	ID10497	ID104971	MZ	68	female	11/24/14	Visit	0
ERS1130555	ID104972	ID10497	ID104972	MZ	68	female	11/22/14	Visit	0
ERS1130576	ID110431	ID11043	ID110431	MZ	67	female	2014-03-12	Visit	0
ERS1130596	ID112662	ID11266	ID112662	MZ	60	female	2014-02-12	Visit	0
ERS1130595	ID112661	ID11266	ID112661	MZ	60	female	2014-02-12	Visit	0
ERS1130587	ID111612	ID11161	ID111612	MZ	70	female	2014-03-12	Visit	0
ERS1130586	ID111611	ID11161	ID111611	MZ	70	female	2014-03-12	Visit	0
ERS1130600	ID114761	ID11476	ID114761	DZ	71	female	2014-02-12	Visit	0
ERS1130601	ID114762	ID11476	ID114762	DZ	71	female	2014-03-12	Visit	0
ERS1130581	ID110491	ID11049	ID110491	MZ	46	male	2014-03-12	Visit	0
ERS1130585	ID111561	ID11156	ID111561	MZ	54	female	2014-12-11	Visit	0
ERS1131097	ID100191	ID10019	ID100191	DZ	55	female	2014-08-12	Visit	0
ERS1131101	ID101081	ID10108	ID101081	DZ	76	female	2014-10-12	Visit	0
ERS1131149	ID113971	ID11397	ID113971	DZ	65	male	2014-10-12	Visit	0
ERS1131103	ID102391	ID10239	ID102391	MZ	69	female	2014-08-12	Visit	0
ERS1131137	ID111601	ID11160	ID111601	DZ	84	male	2014-10-12	Visit	0
ERS1131138	ID111602	ID11160	ID111602	DZ	84	male	2014-10-12	Visit	0
ERS1131144	ID112901	ID11290	ID112901	MZ	71	female	2014-11-12	Visit	0
ERS1131158	ID115081	ID11508	ID115081	DZ	39	female	12/14/14	Visit	0
ERS1131125	ID107861	ID10786	ID107861	MZ	79	male	12/15/14	Visit	0
ERS1131153	ID114702	ID11470	ID114702	MZ	64	female	2014-08-12	Visit	0
ERS1131129	ID108301	ID10830	ID108301	DZ	59	female	12/14/14	Visit	0
ERS1131130	ID108302	ID10830	ID108302	DZ	59	female	2014-12-12	Visit	0
ERS1131096	ID100102	ID10010	ID100102	MZ	71	female	12/18/14	Visit	0
ERS1131095	ID100101	ID10010	ID100101	MZ	71	female	12/18/14	Visit	0
ERS1131127	ID108142	ID10814	ID108142	MZ	65	female	12/17/14	Visit	0
ERS1131126	ID108141	ID10814	ID108141	MZ	65	female	12/16/14	Visit	0
ERS1131100	ID101041	ID10104	ID101041	DZ	66	female	12/18/14	Visit	0
ERS1131120	ID106861	ID10686	ID106861	MZ	50	male	12/19/14	Visit	0
ERS1131152	ID114701	ID11470	ID114701	MZ	64	female	2014-08-12	Visit	0
ERS1131133	ID109491	ID10949	ID109491	MZ	42	female	2015-05-01	Visit	0
ERS1131113	ID105961	ID10596	ID105961	DZ	69	female	2015-05-01	Visit	0
ERS1131114	ID105962	ID10596	ID105962	DZ	69	female	2015-05-01	Visit	0
ERS1131156	ID115031	ID11503	ID115031	DZ	81	male	2015-05-01	Visit	0
ERS1131157	ID115032	ID11503	ID115032	DZ	81	male	2015-04-01	Visit	0
ERS1131132	ID109112	ID10911	ID109112	MZ	68	female	2014-07-12	Visit	0
ERS1131124	ID107182	ID10718	ID107182	DZ	74	female	2015-04-01	Visit	0
ERS1131154	ID114931	ID11493	ID114931	DZ	75	female	2015-06-01	Visit	0
ERS1131122	ID107171	ID10717	ID107171	DZ	76	female	2015-06-01	Visit	0
ERS1131148	ID113732	ID11373	ID113732	DZ	55	female	2015-07-01	Visit	0
ERS1131147	ID113731	ID11373	ID113731	DZ	55	female	2015-06-01	Visit	0
ERS1131131	ID109111	ID10911	ID109111	MZ	68	female	2014-06-12	Visit	0
ERS1131136	ID111571	ID11157	ID111571	MZ	28	female	2015-08-01	Visit	0
ERS1131115	ID106131	ID10613	ID106131	MZ	60	female	2015-09-01	Visit	0
ERS1131104	ID102641	ID10264	ID102641	MZ	51	female	2015-12-01	Visit	0
[truncated: 295 more rows]
