# Supplementary material for: Heritable components of the human fecal microbiome are associated with visceral fat
Source: Springer Nature journal article supplement (doi:10.1186/s13059-016-1052-7), 2016-09-21

Visceral Fat Mass

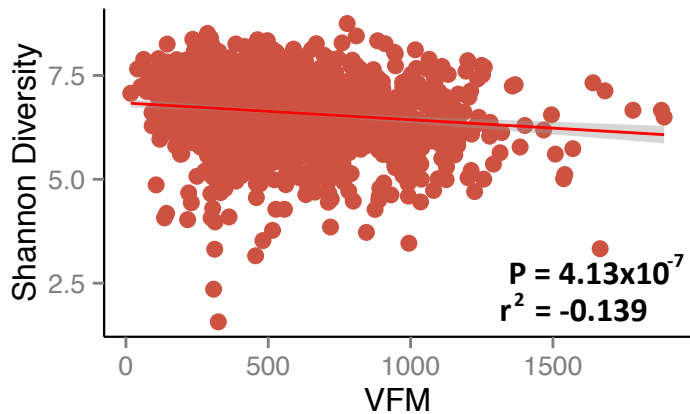

BMI

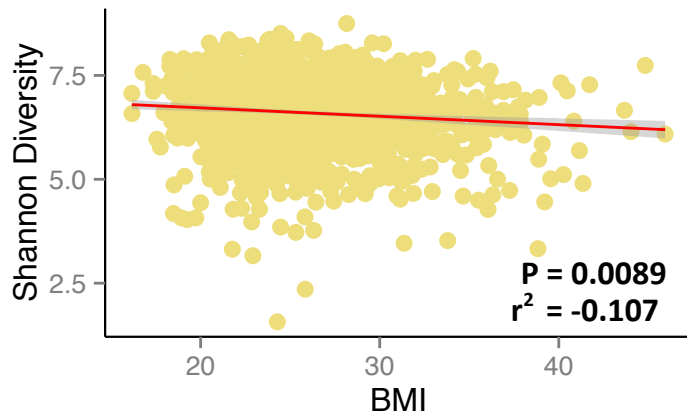

Subcutaneous Fat Mass

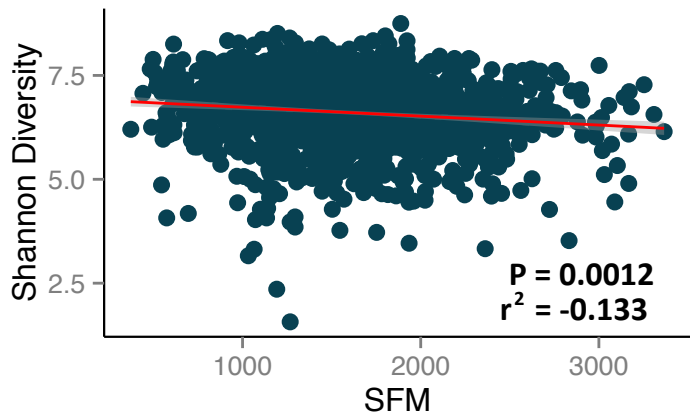

% Trunk Fat

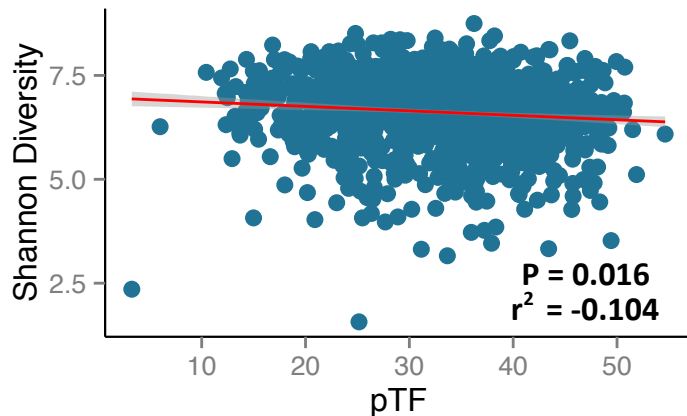

Android:Gynoid Ratio

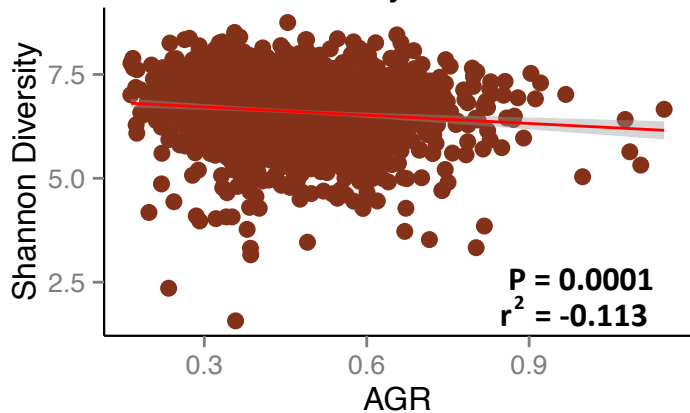

Waist:Hip Ratio

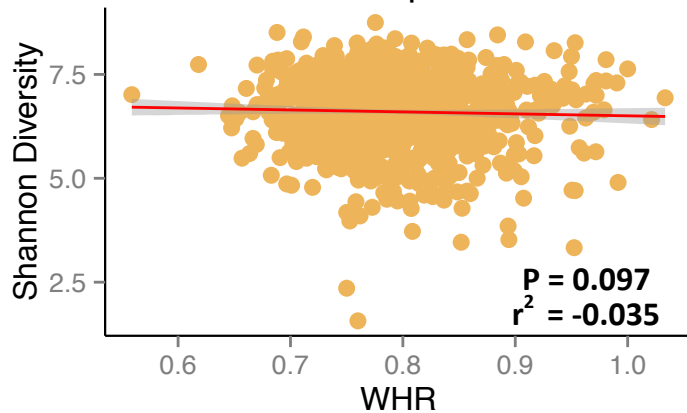

Supplement: MOESM4 [file 13059_2016_1052_MOESM4_ESM.pdf]
