# Supplementary material for: Heritable components of the human fecal microbiome are associated with visceral fat
Source: Springer Nature journal article supplement (doi:10.1186/s13059-016-1052-7), 2016-09-21

**A.**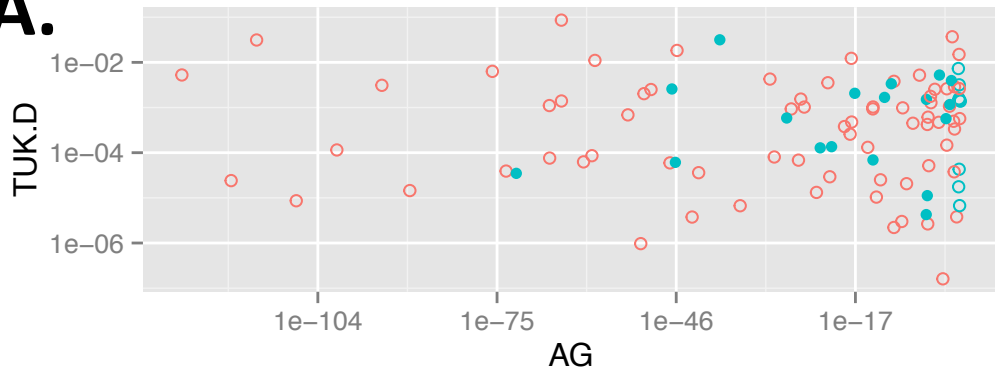**B.**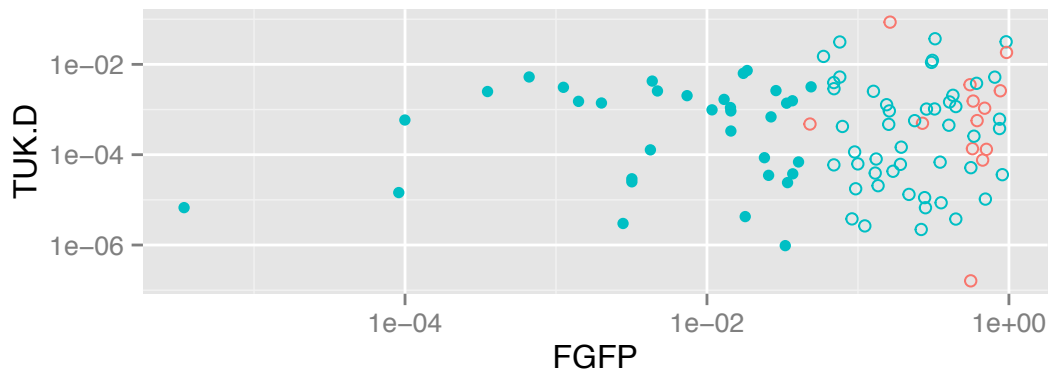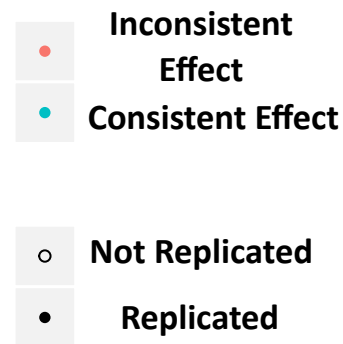**C.**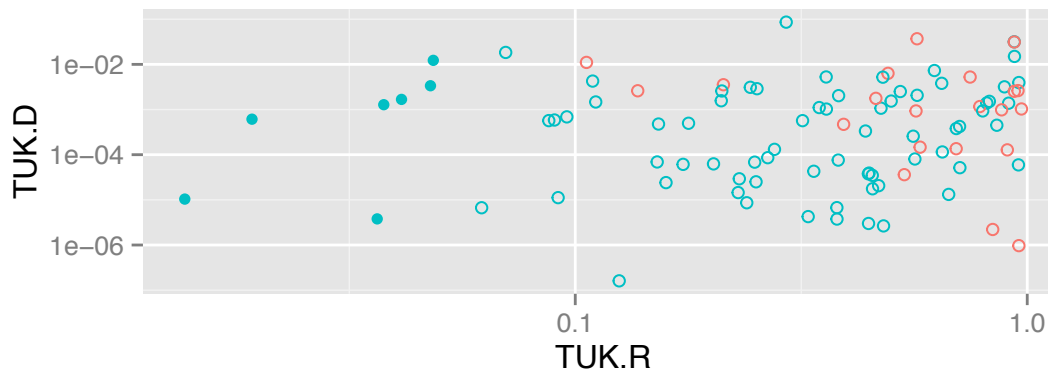

Supplement: MOESM5 [file 13059_2016_1052_MOESM5_ESM.pdf]
